# Supplementary material for: FIRMA: a method for detection of alternative splicing from exon array data
Source: PubMed Central journal article supplement — Bioinformatics. 2008 Jun 23;24(15):1707–14. doi: 10.1093/bioinformatics/btn284 (PMC2638867; doi:10.1093/bioinformatics/btn284), 2008-06-23

ENSG00000075415 – SLC25A3

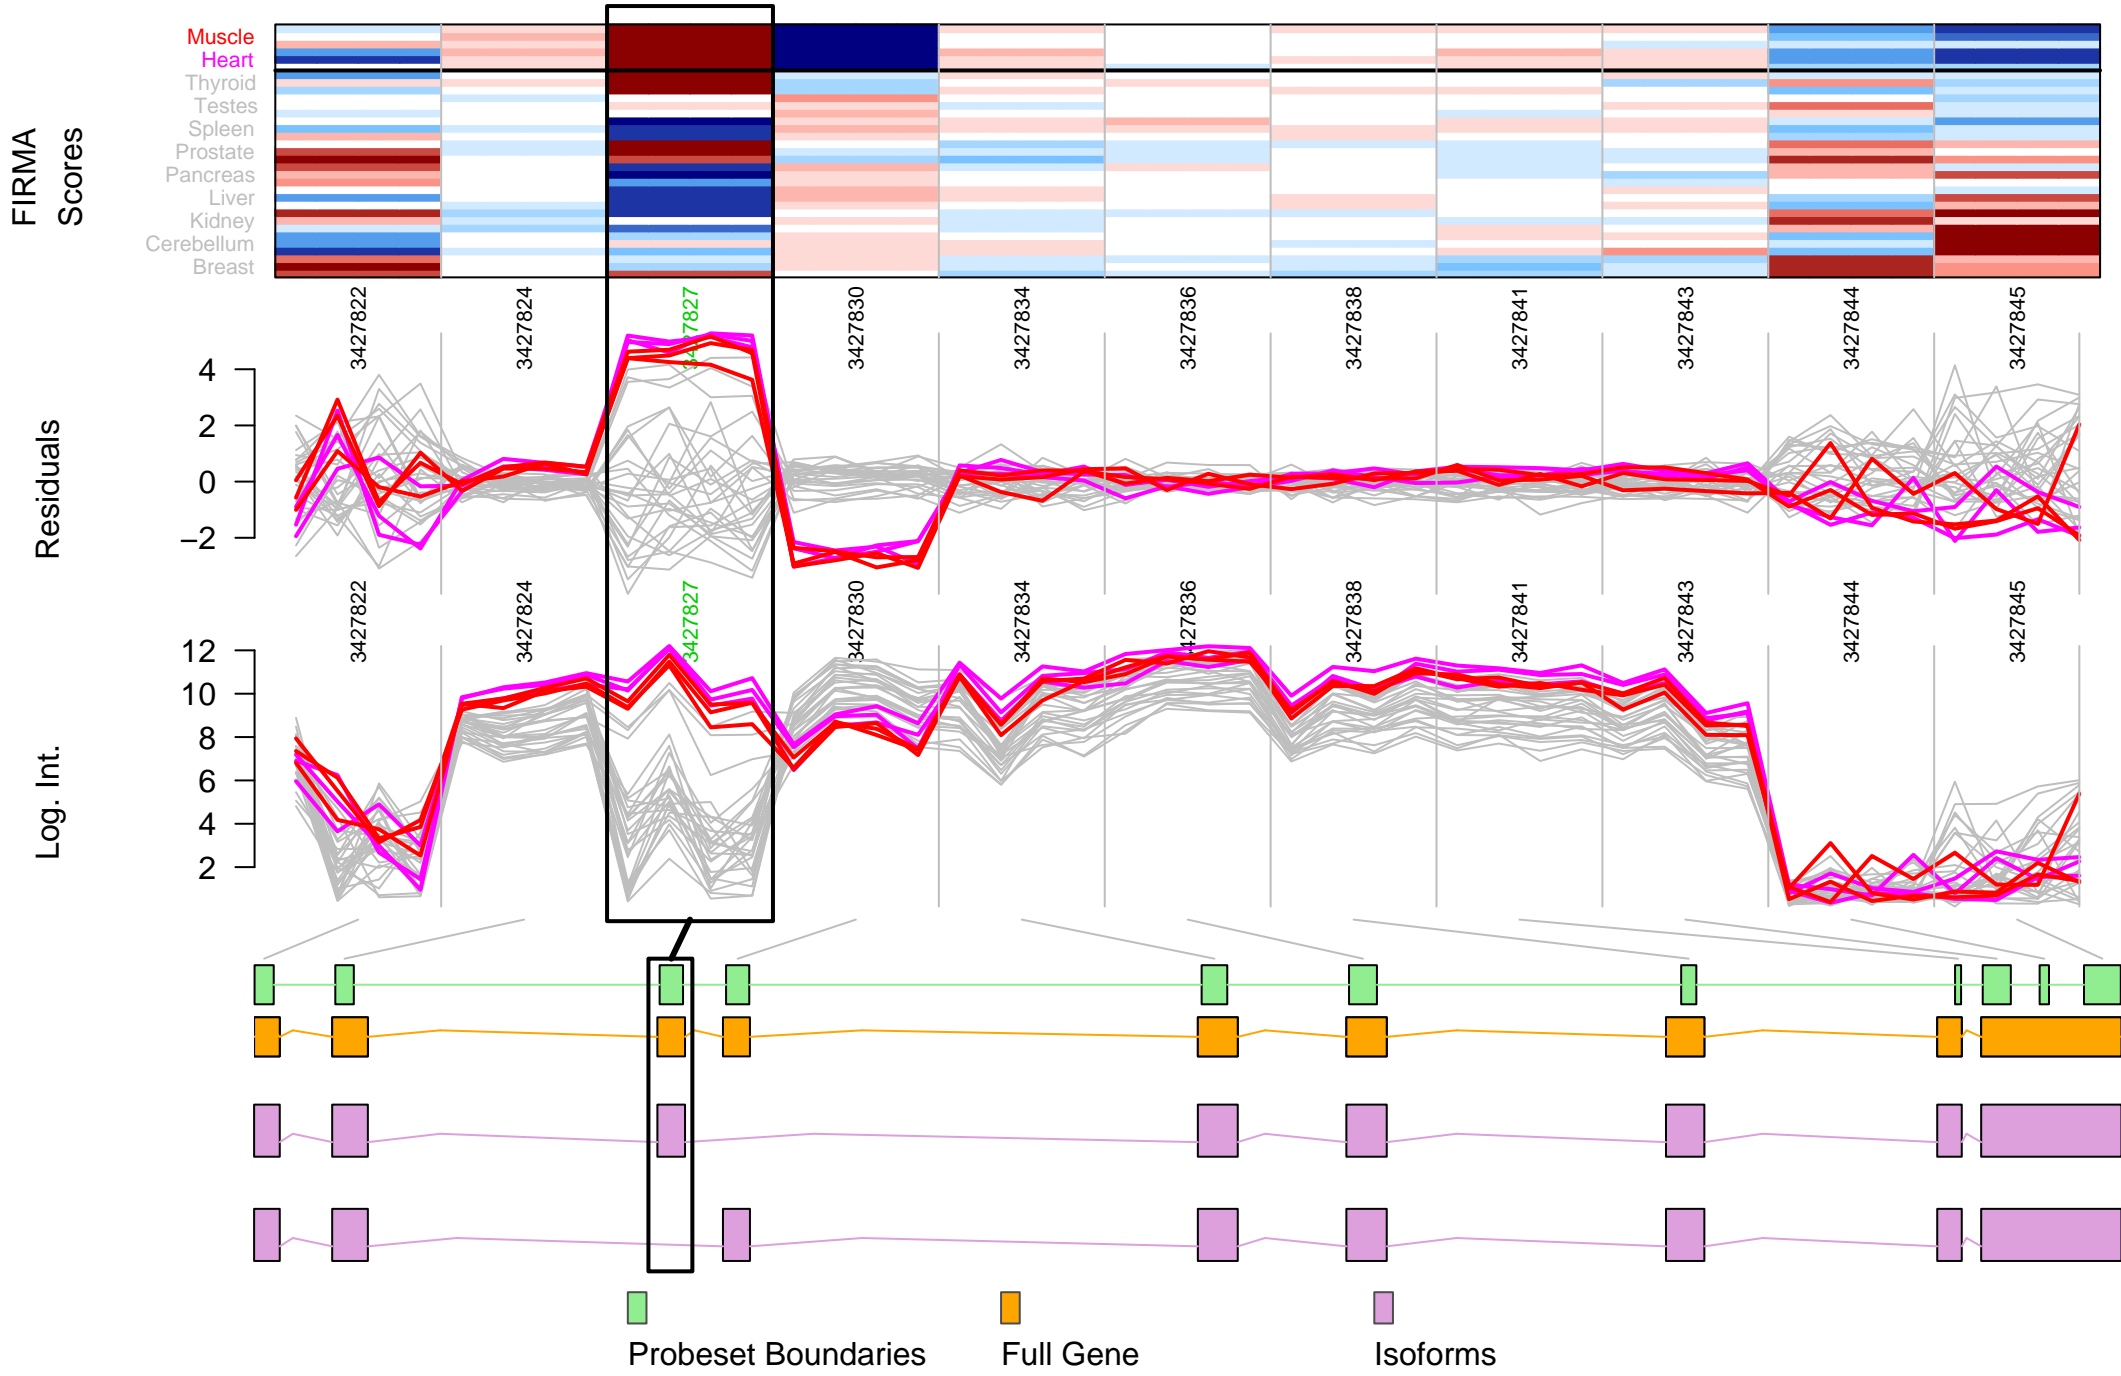

# ENSG00000109332 - UBE2D3

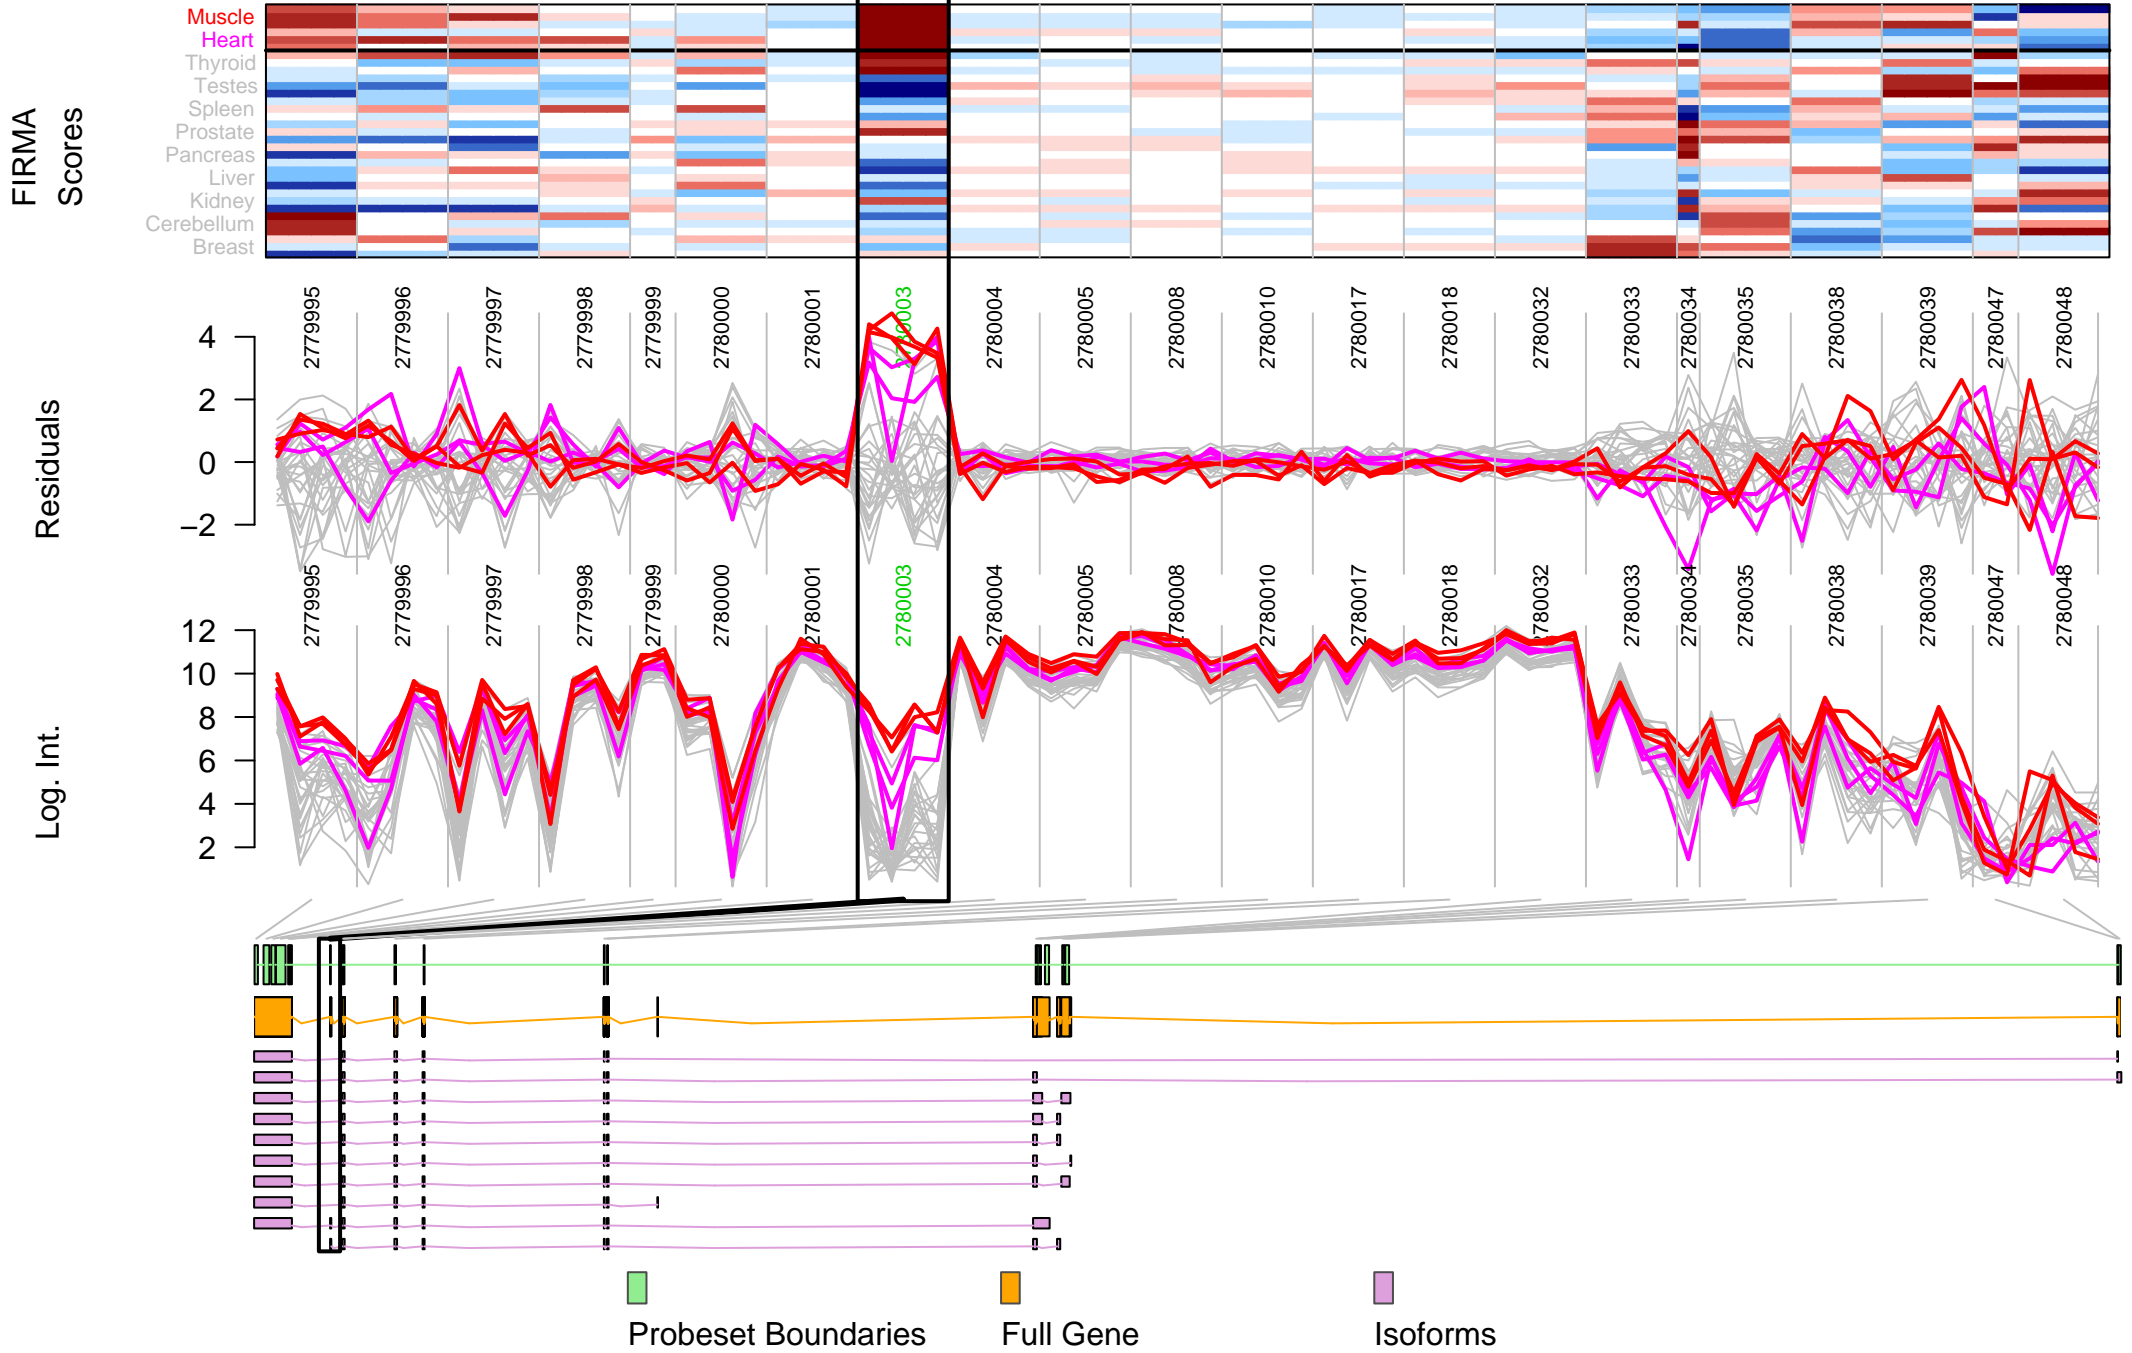

ENSG00000077549 – CAPZB

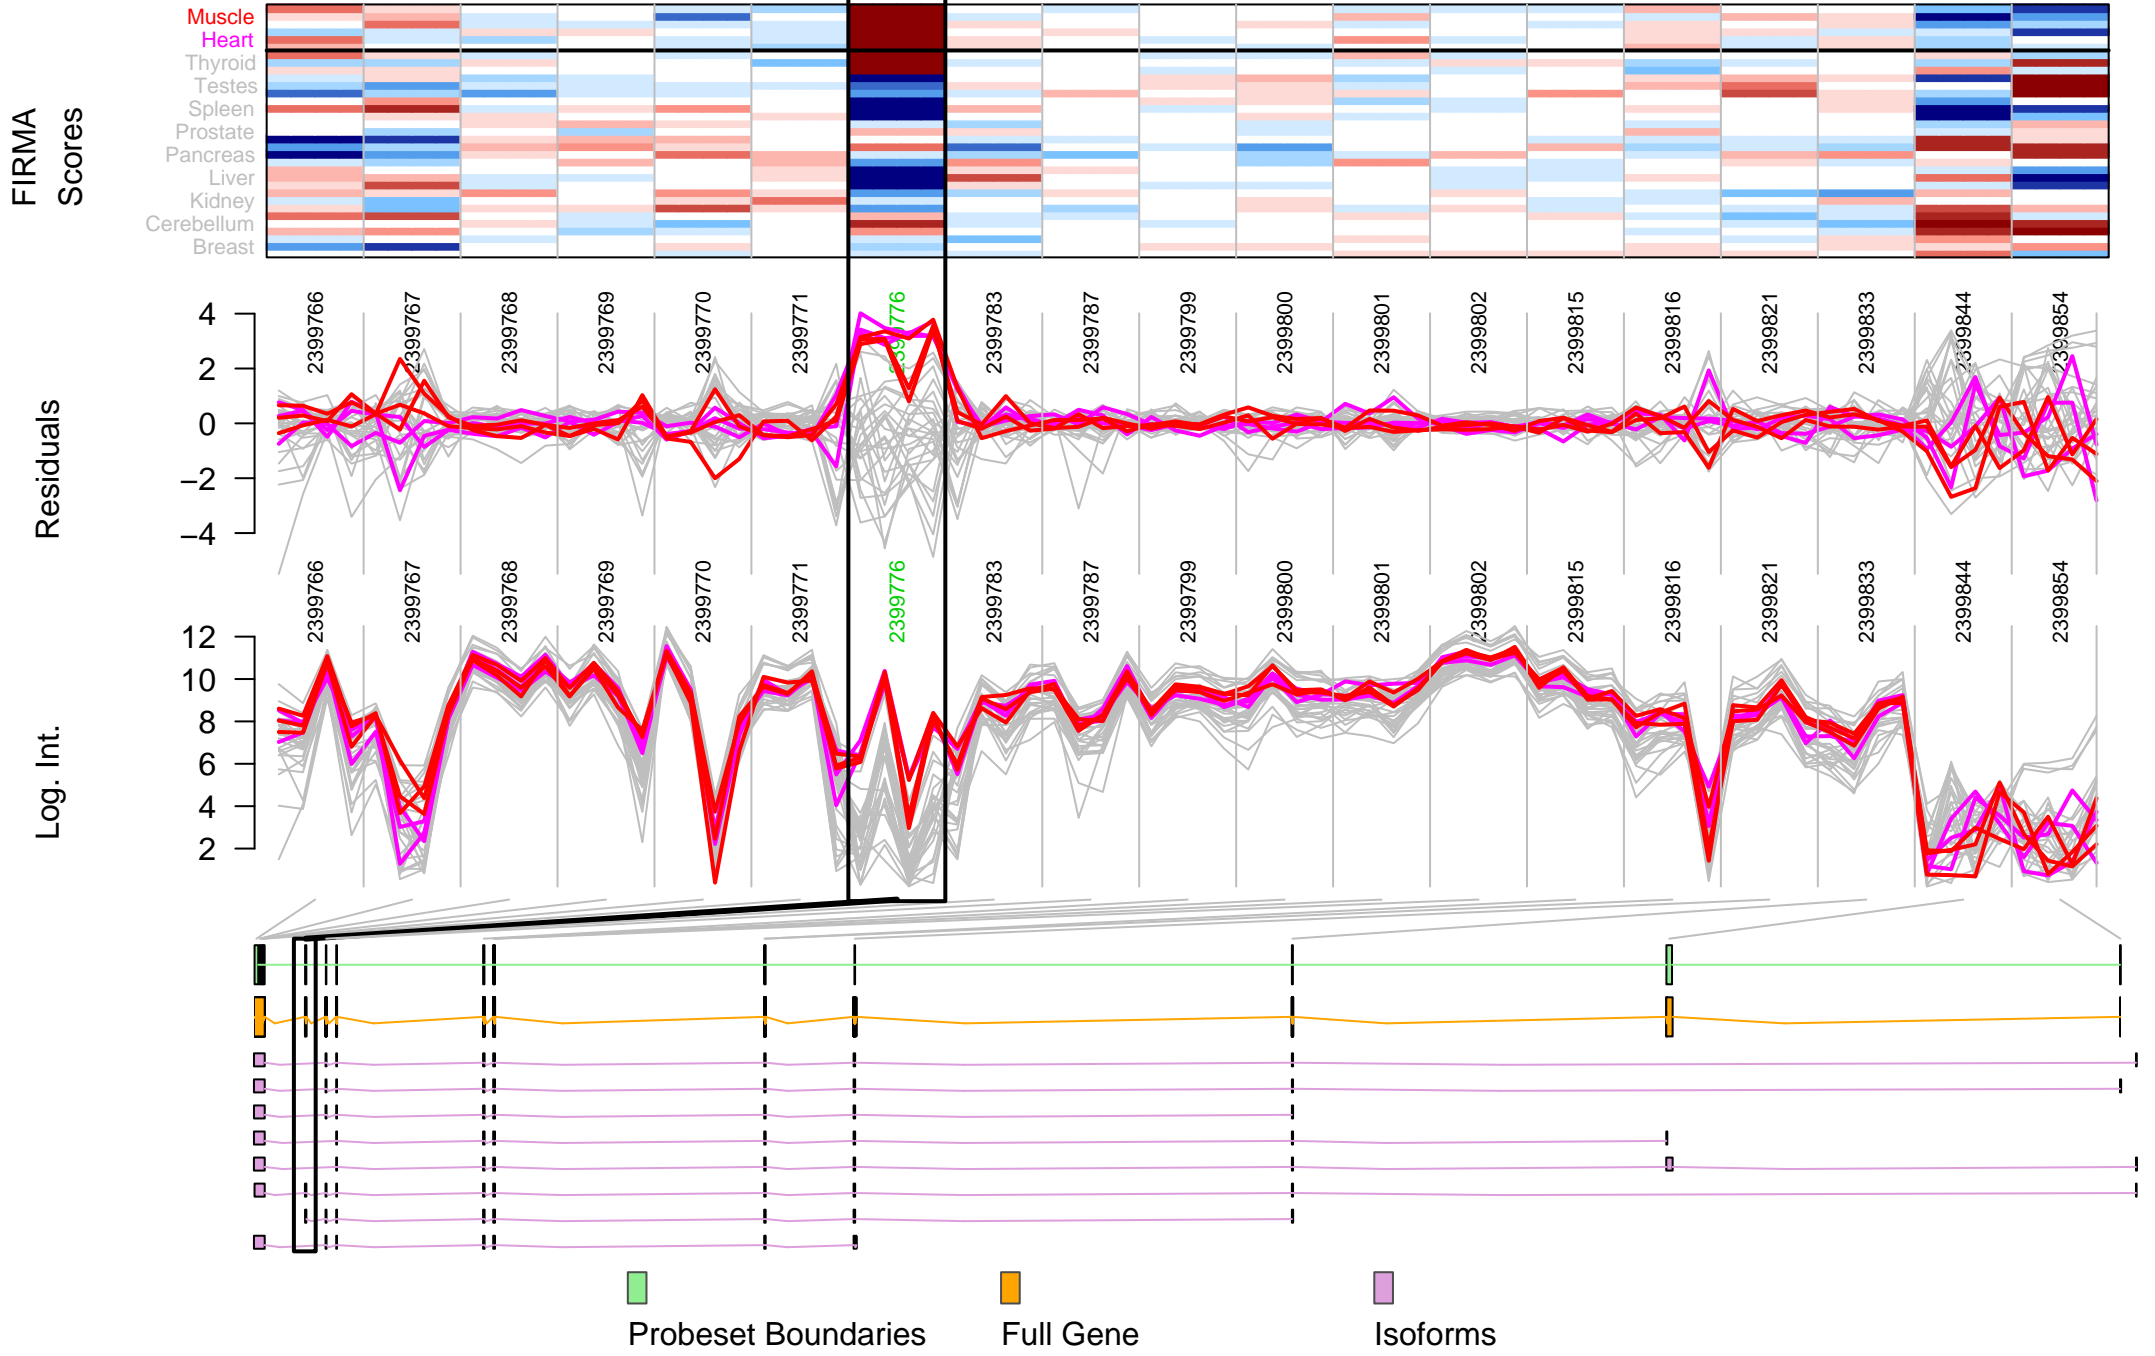

ENSG00000127481 – UBR4

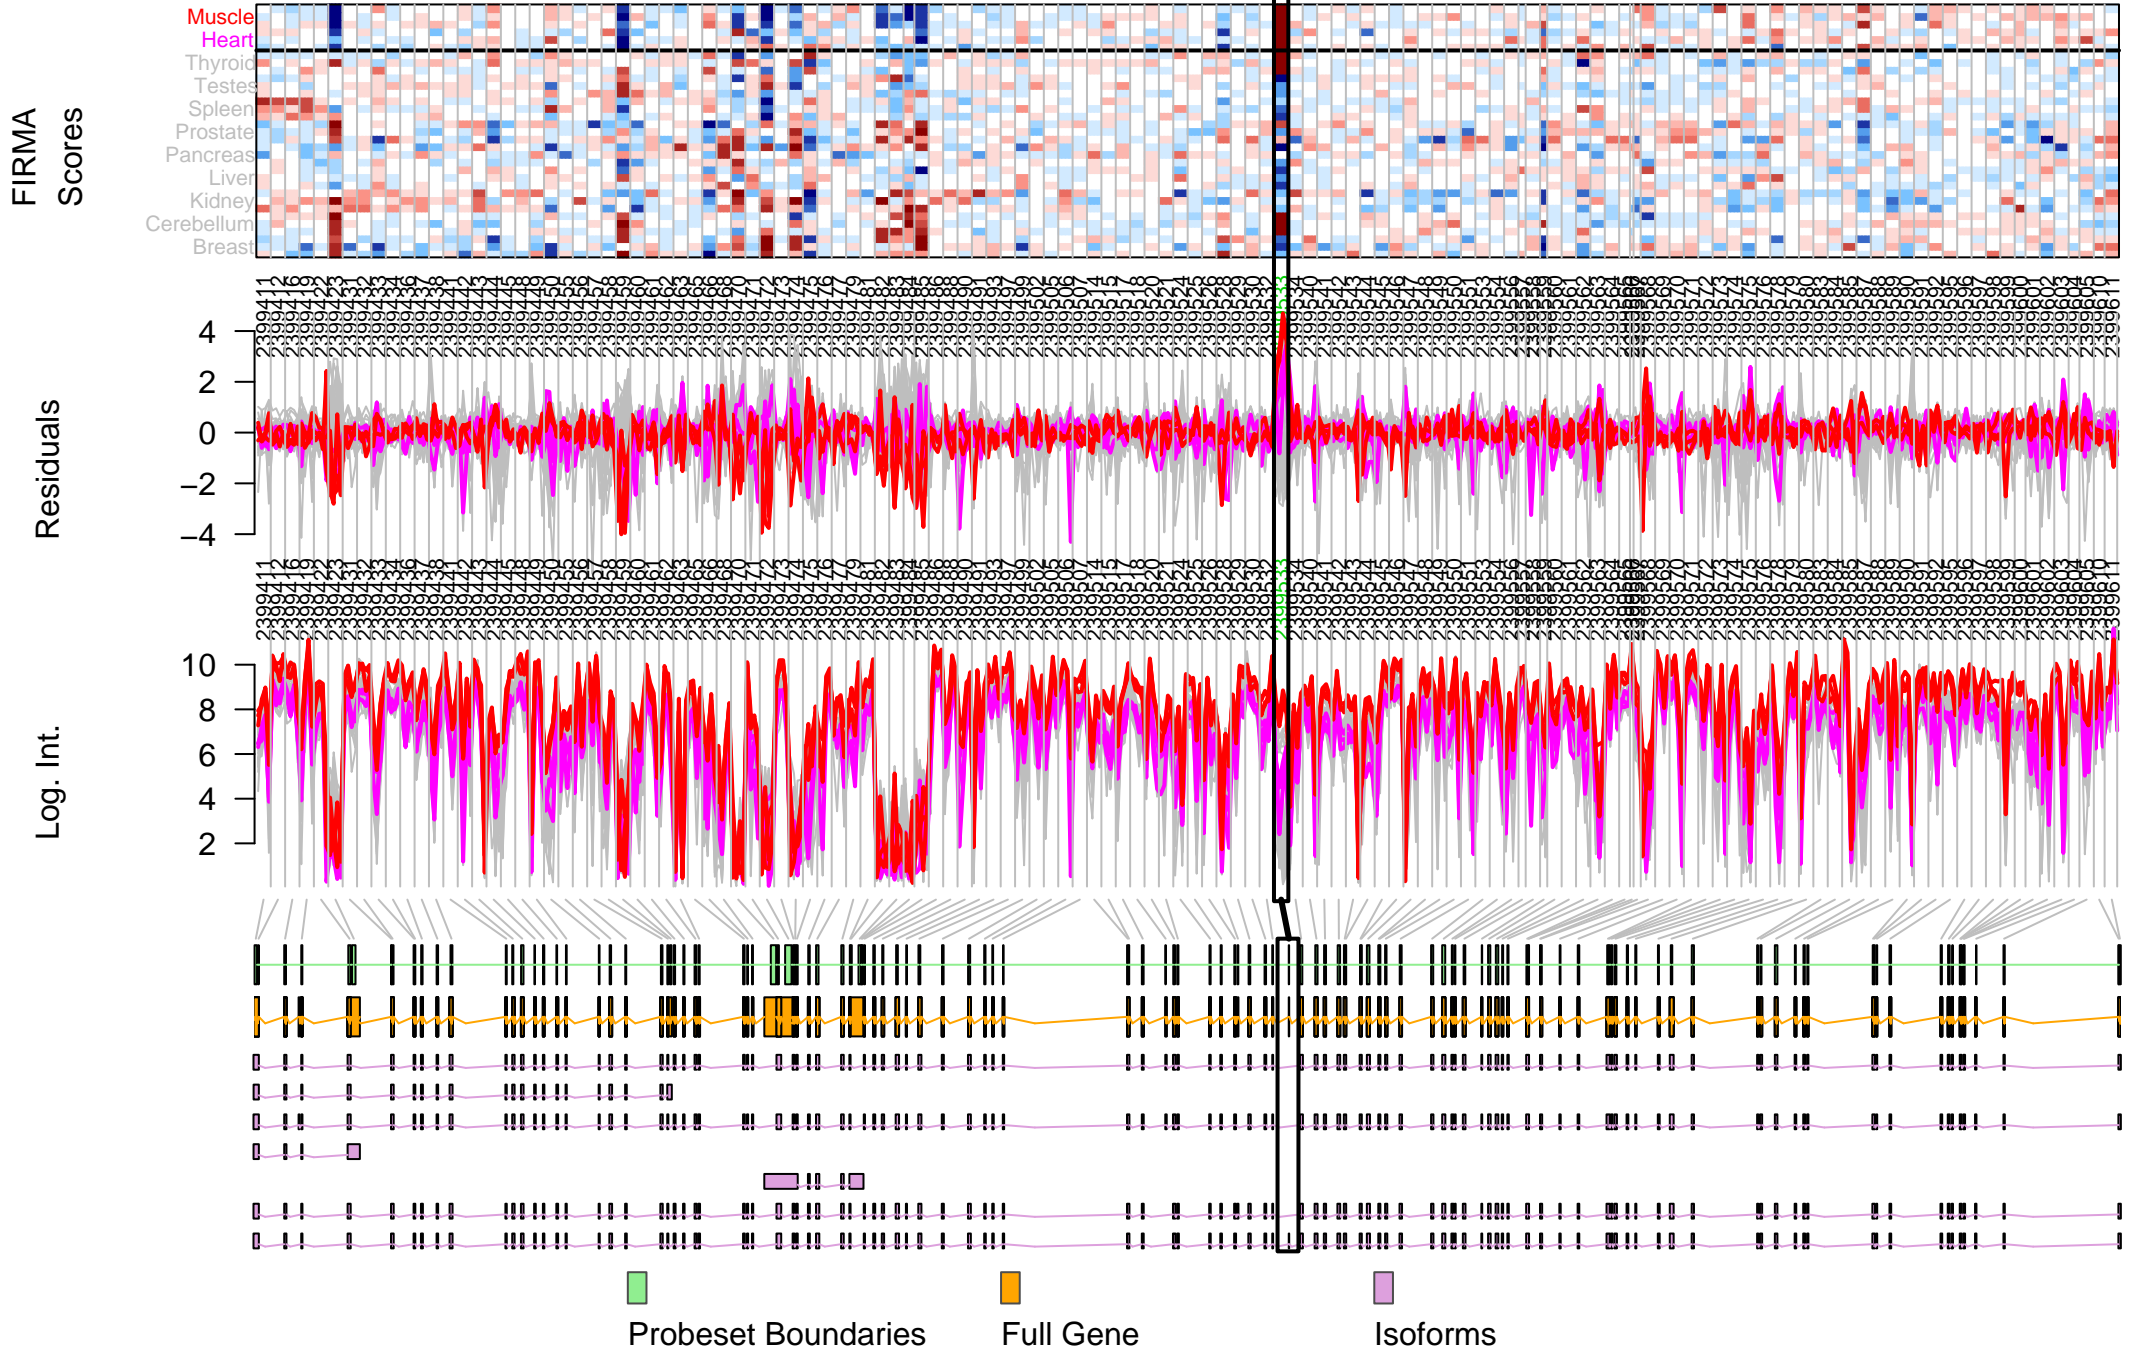

ENSG00000198033 -

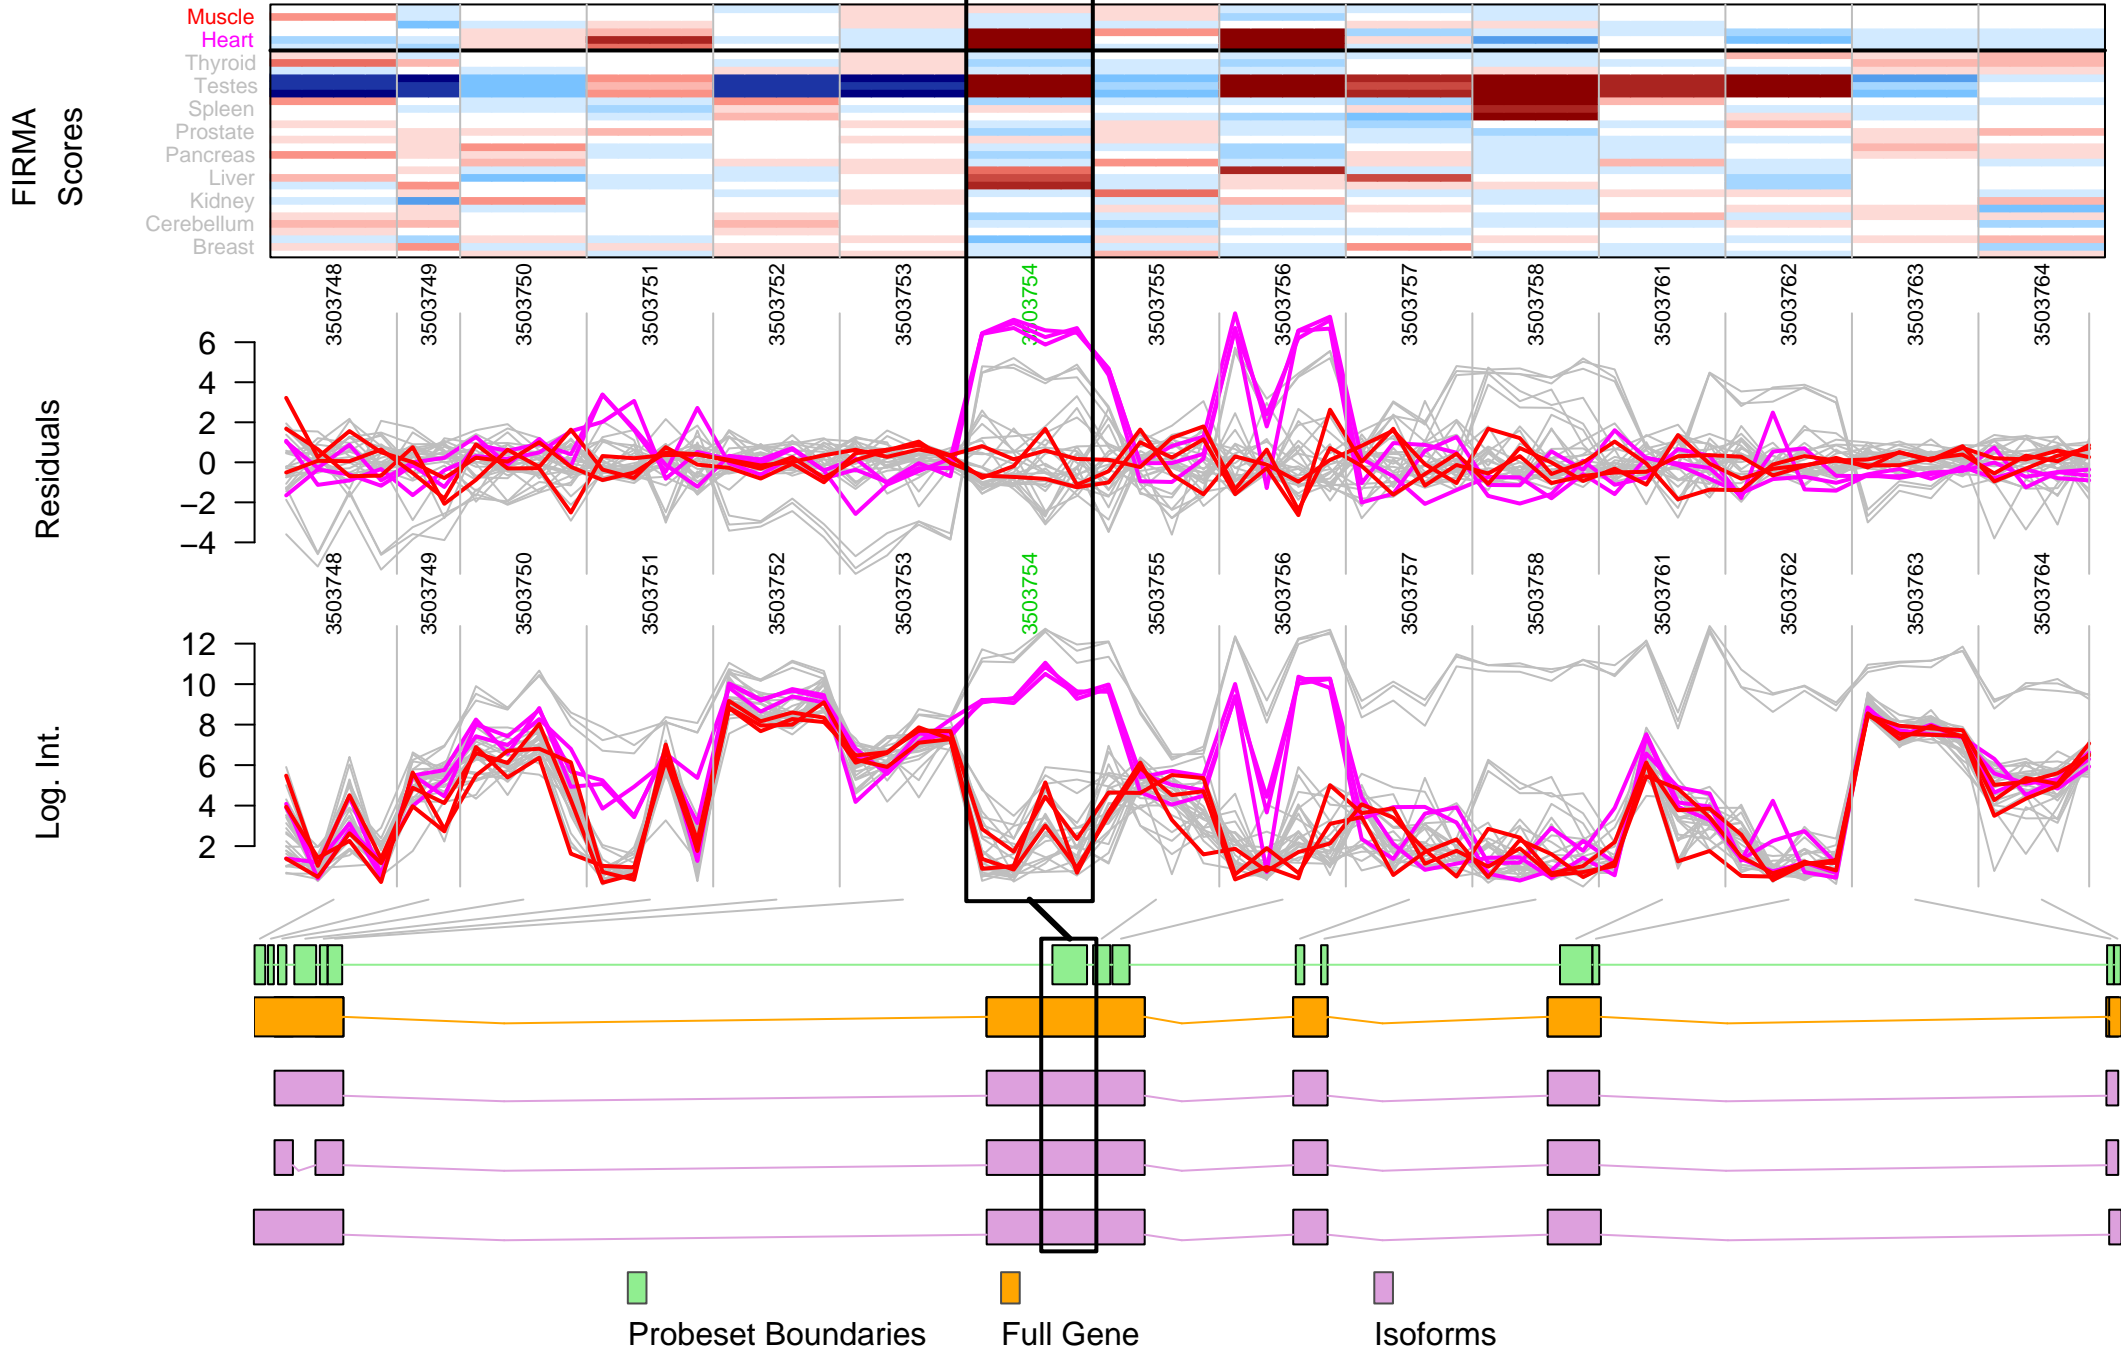

ENSG00000198033 -

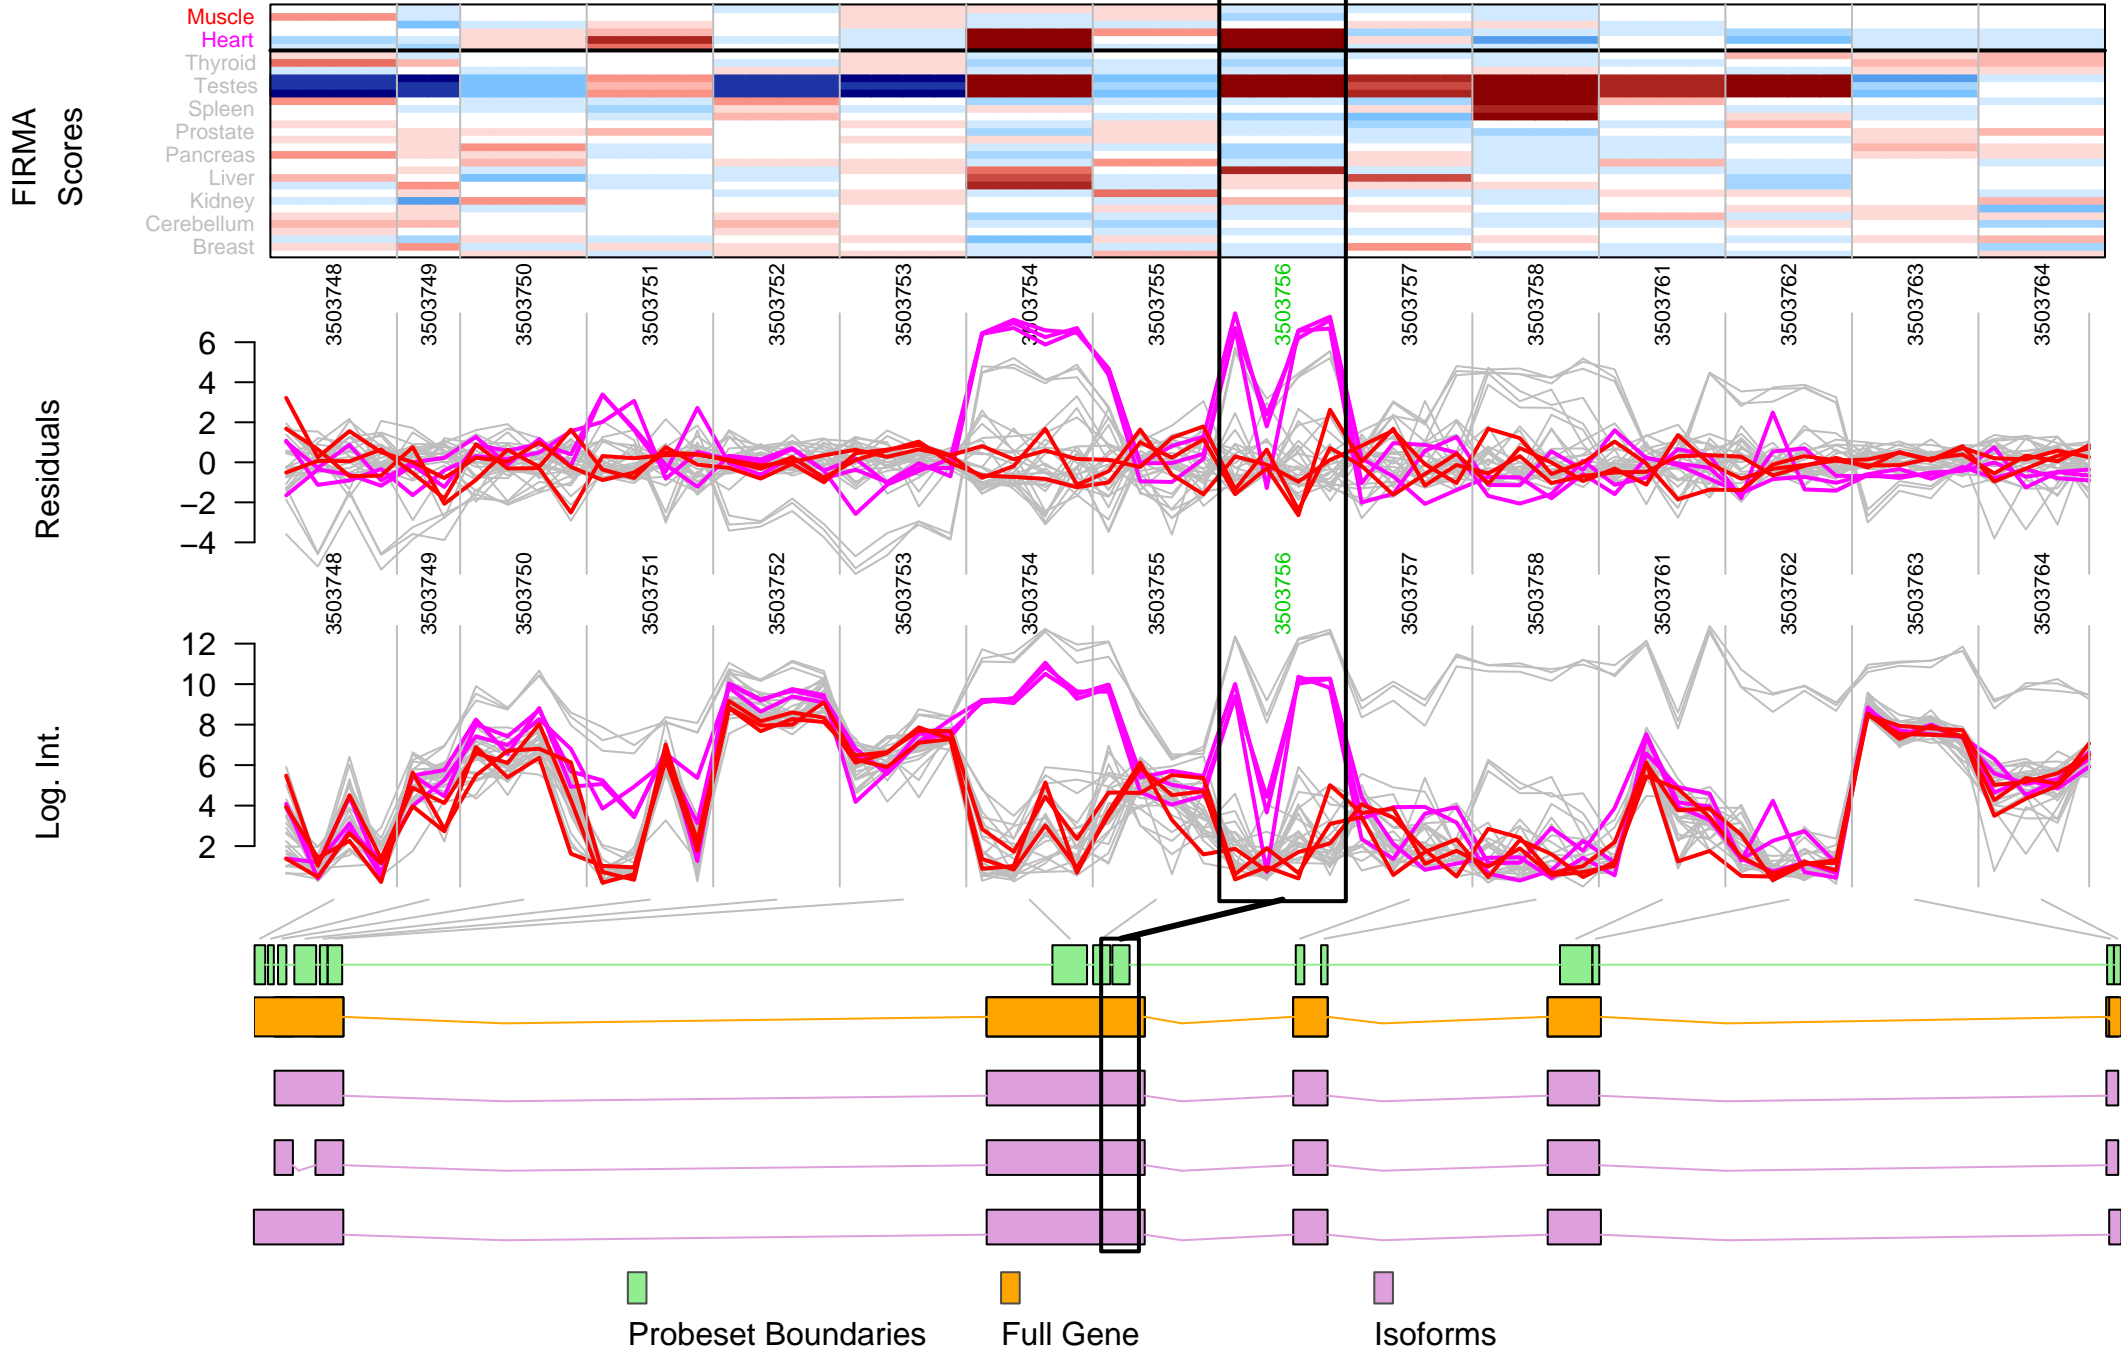

ENSG00000134313 -

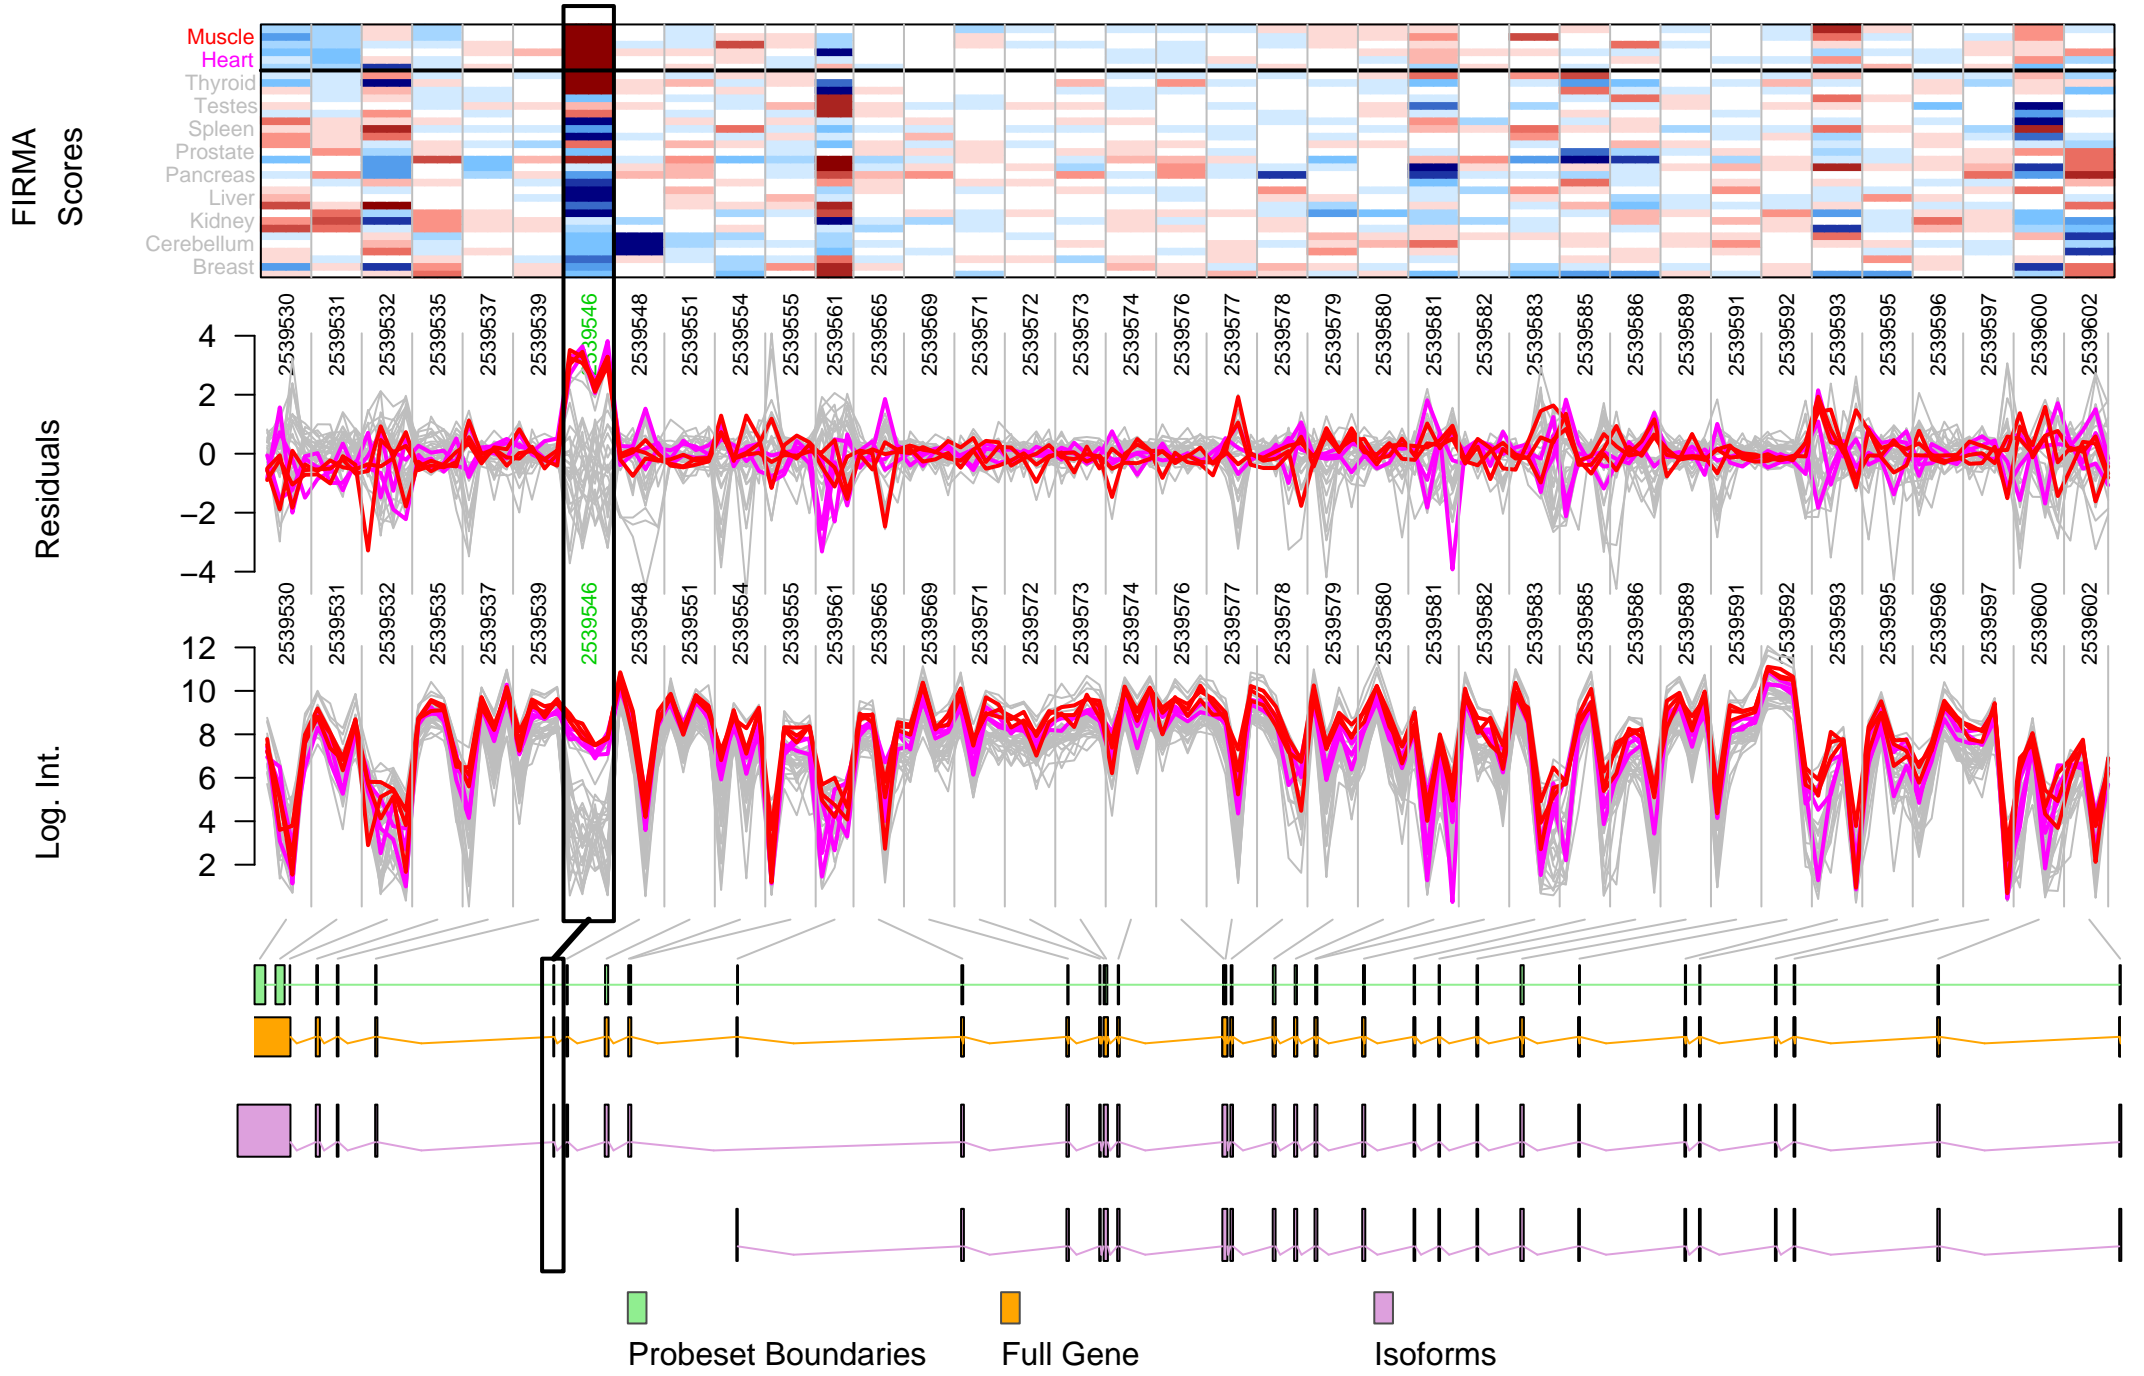

# ENSG00000142192 - APP

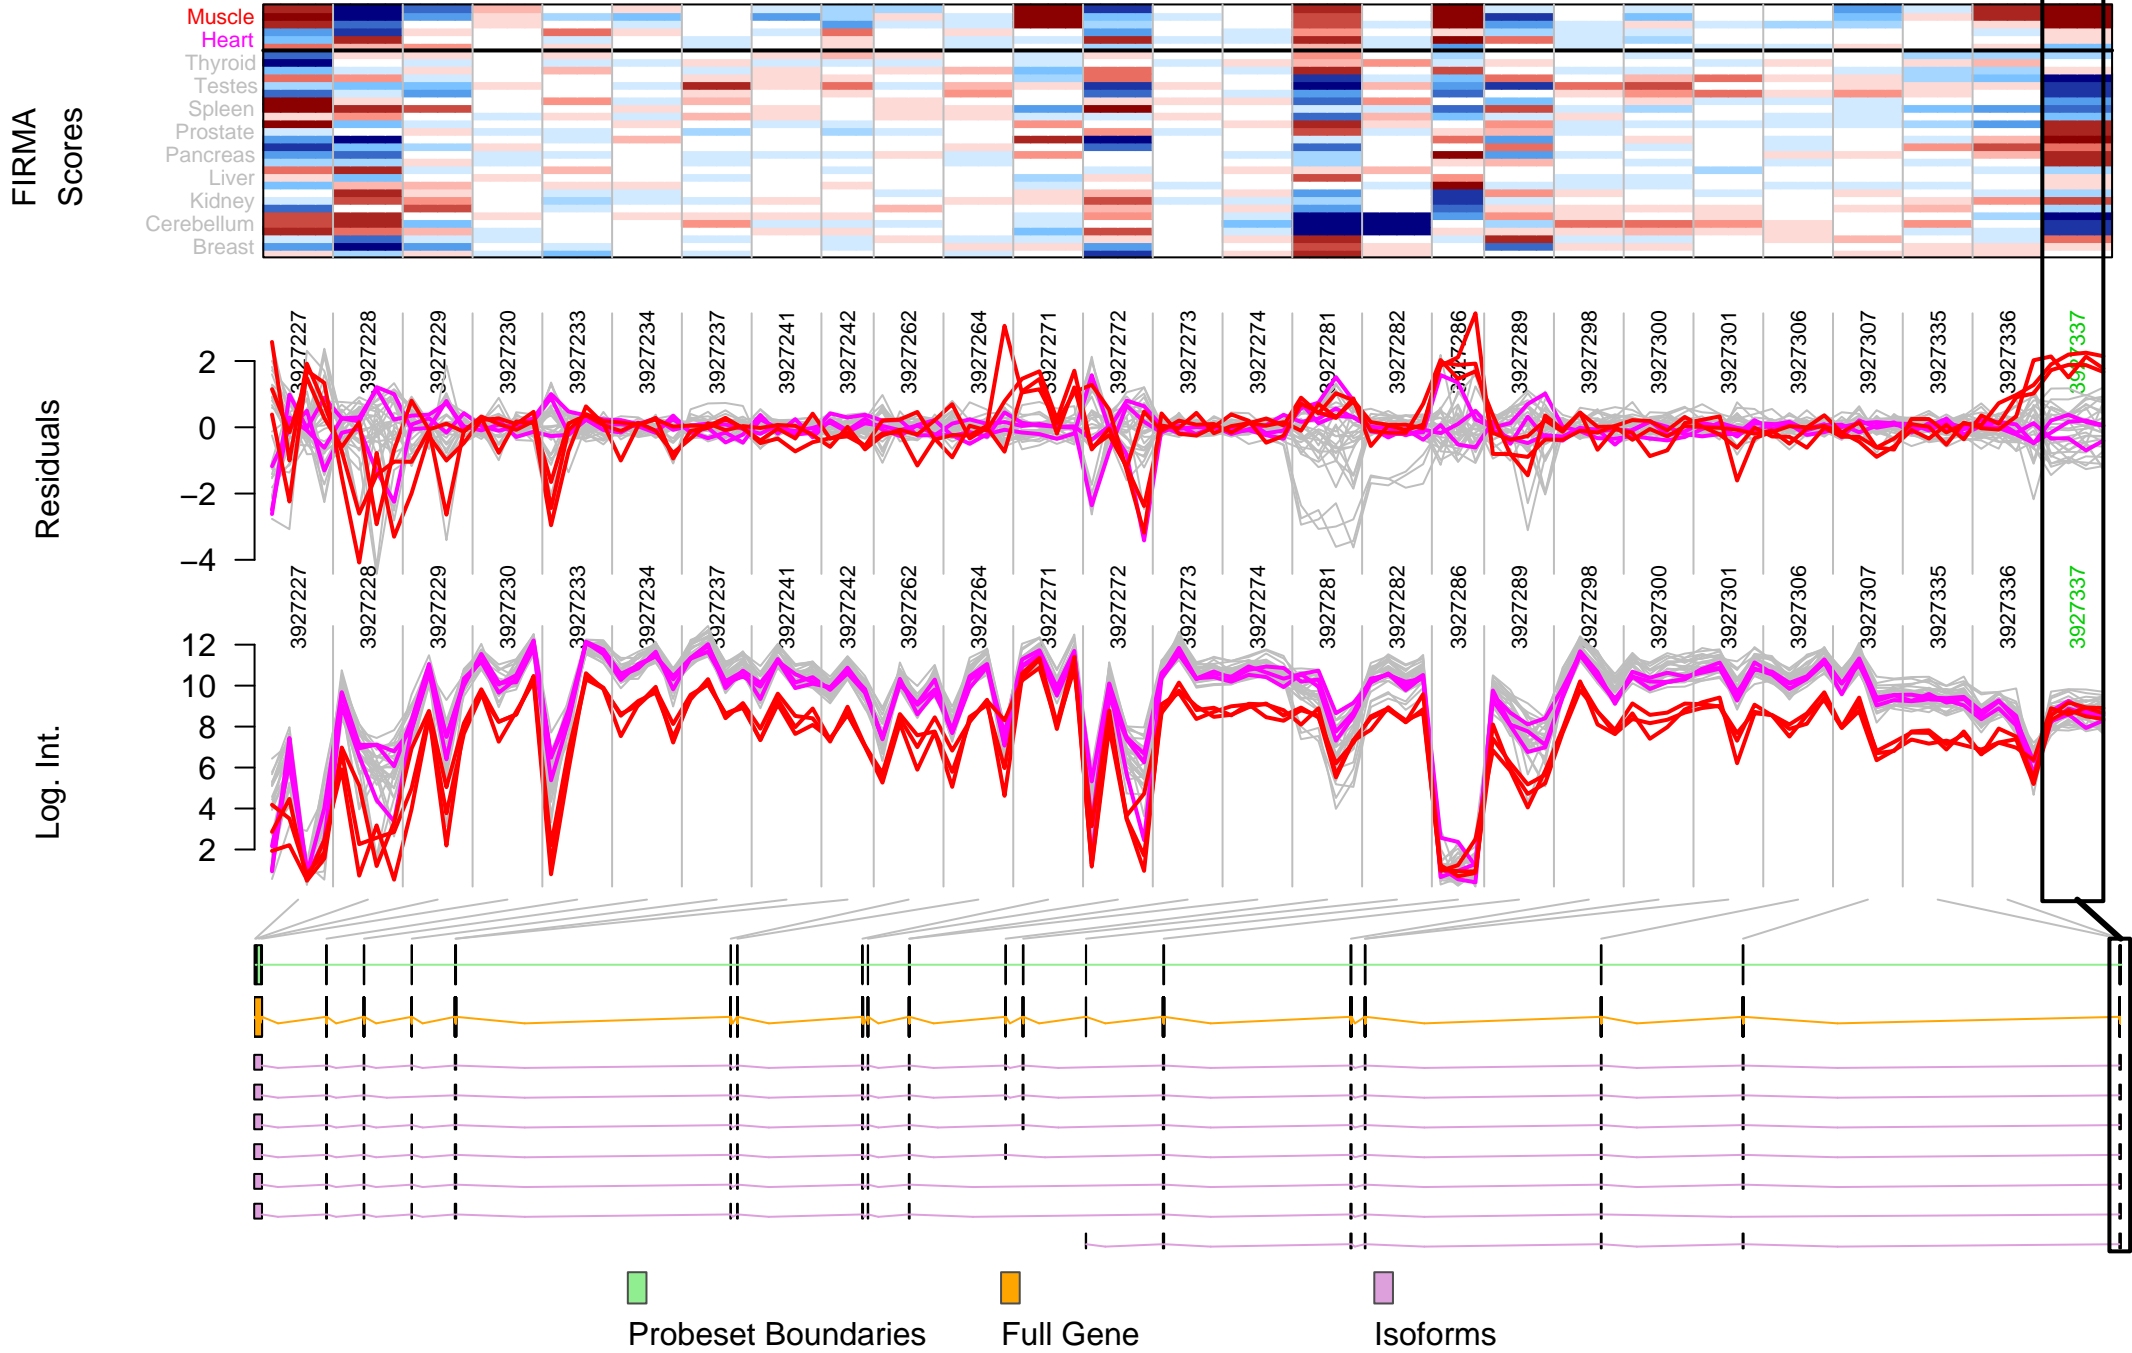



ENSG00000127603 – MACF1

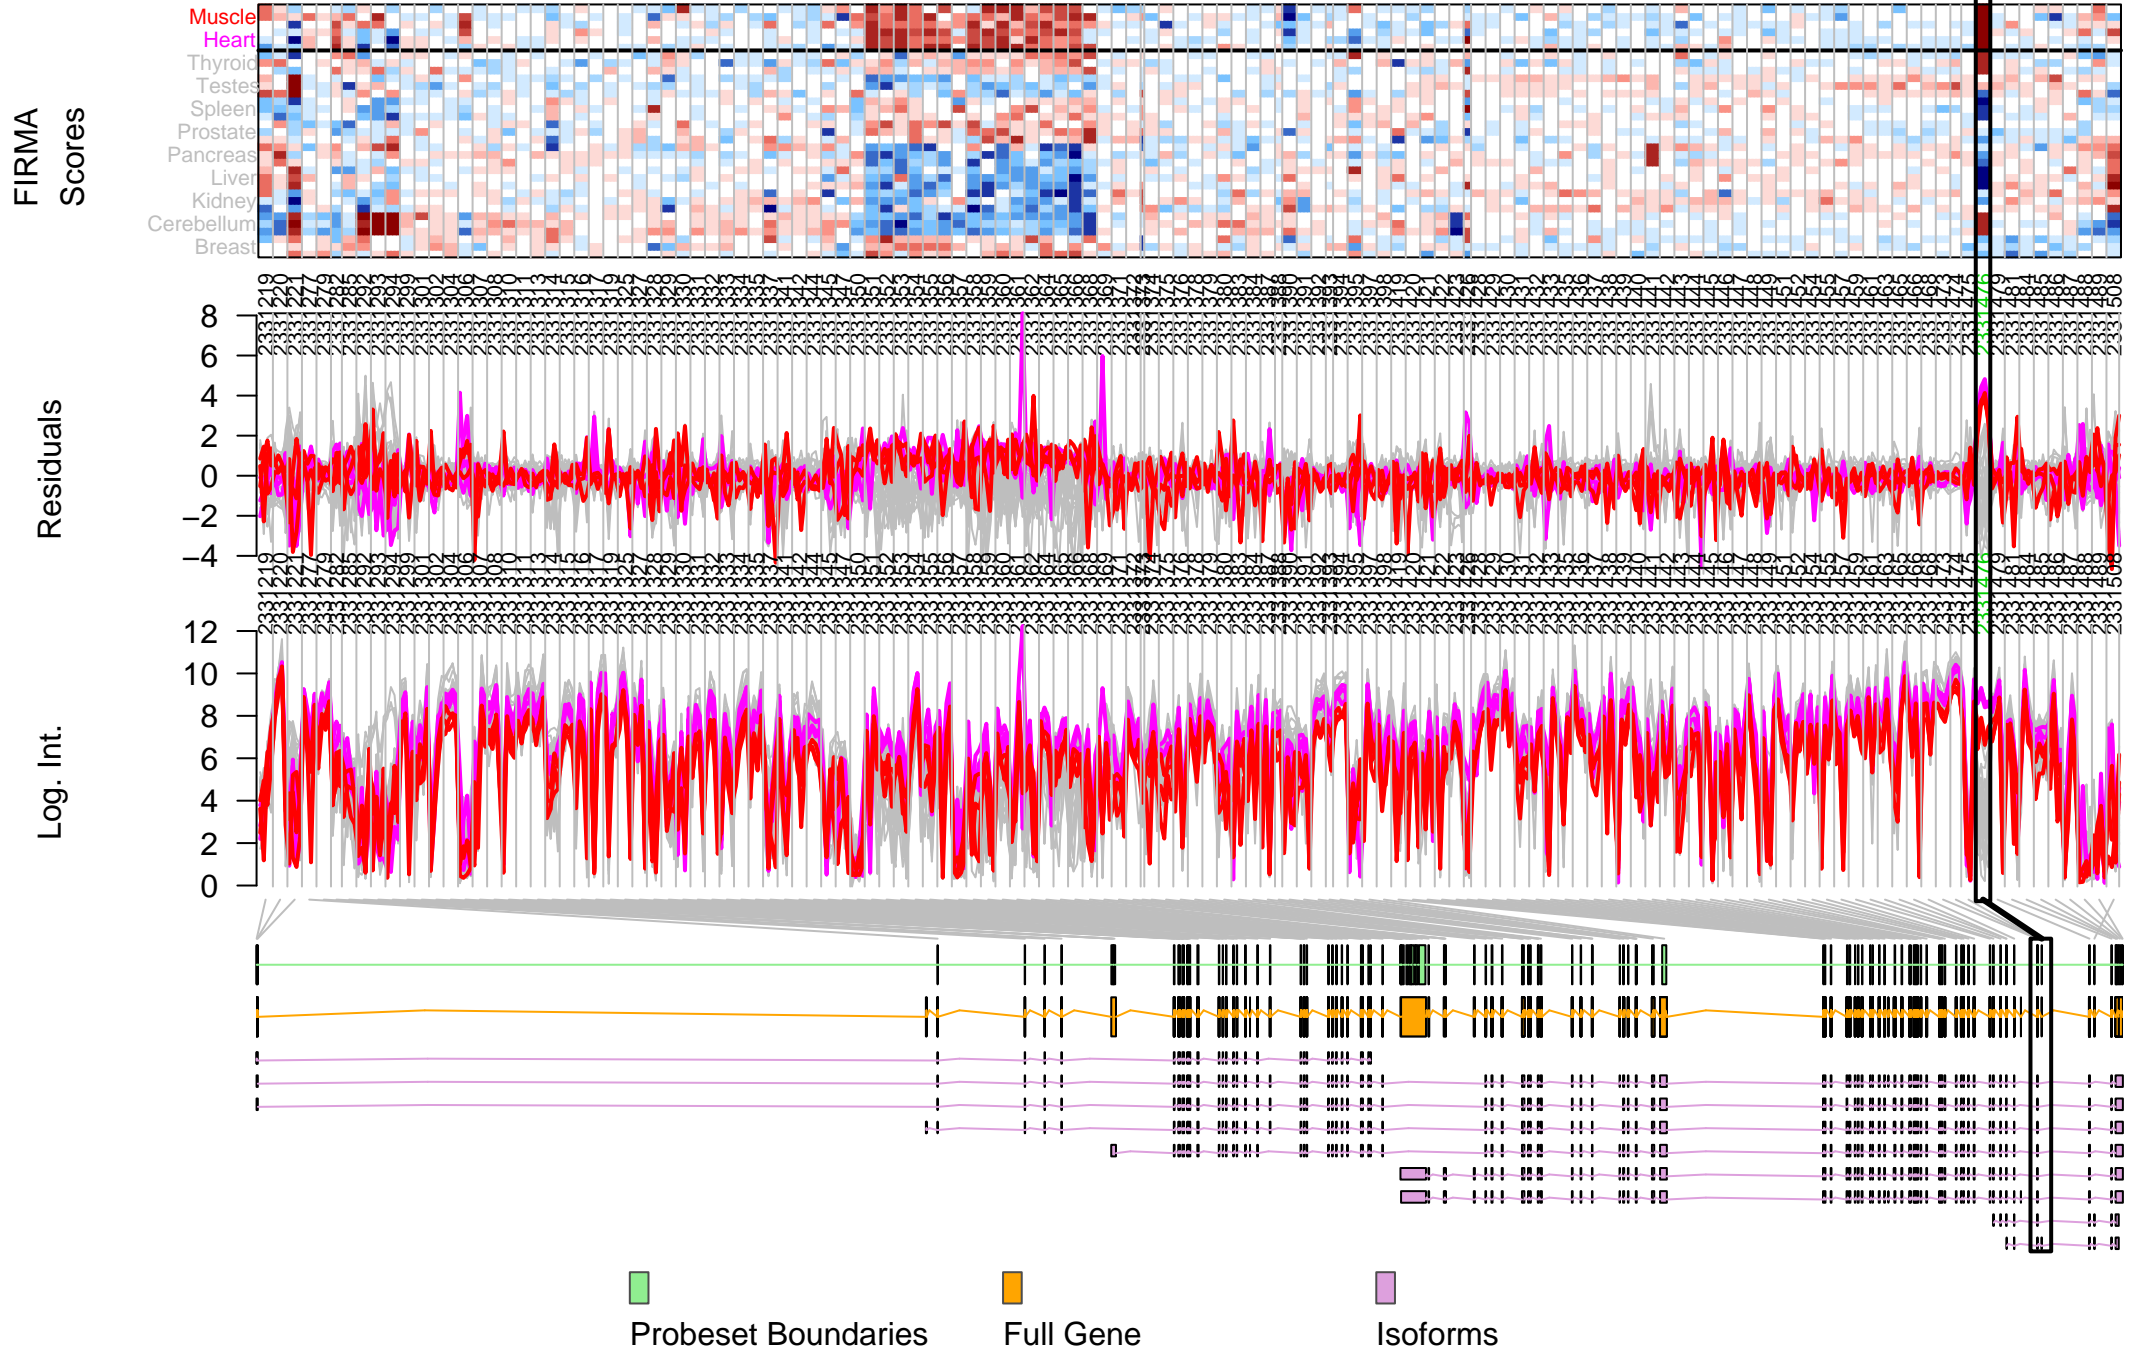

ENSG00000185313 – SCN10A

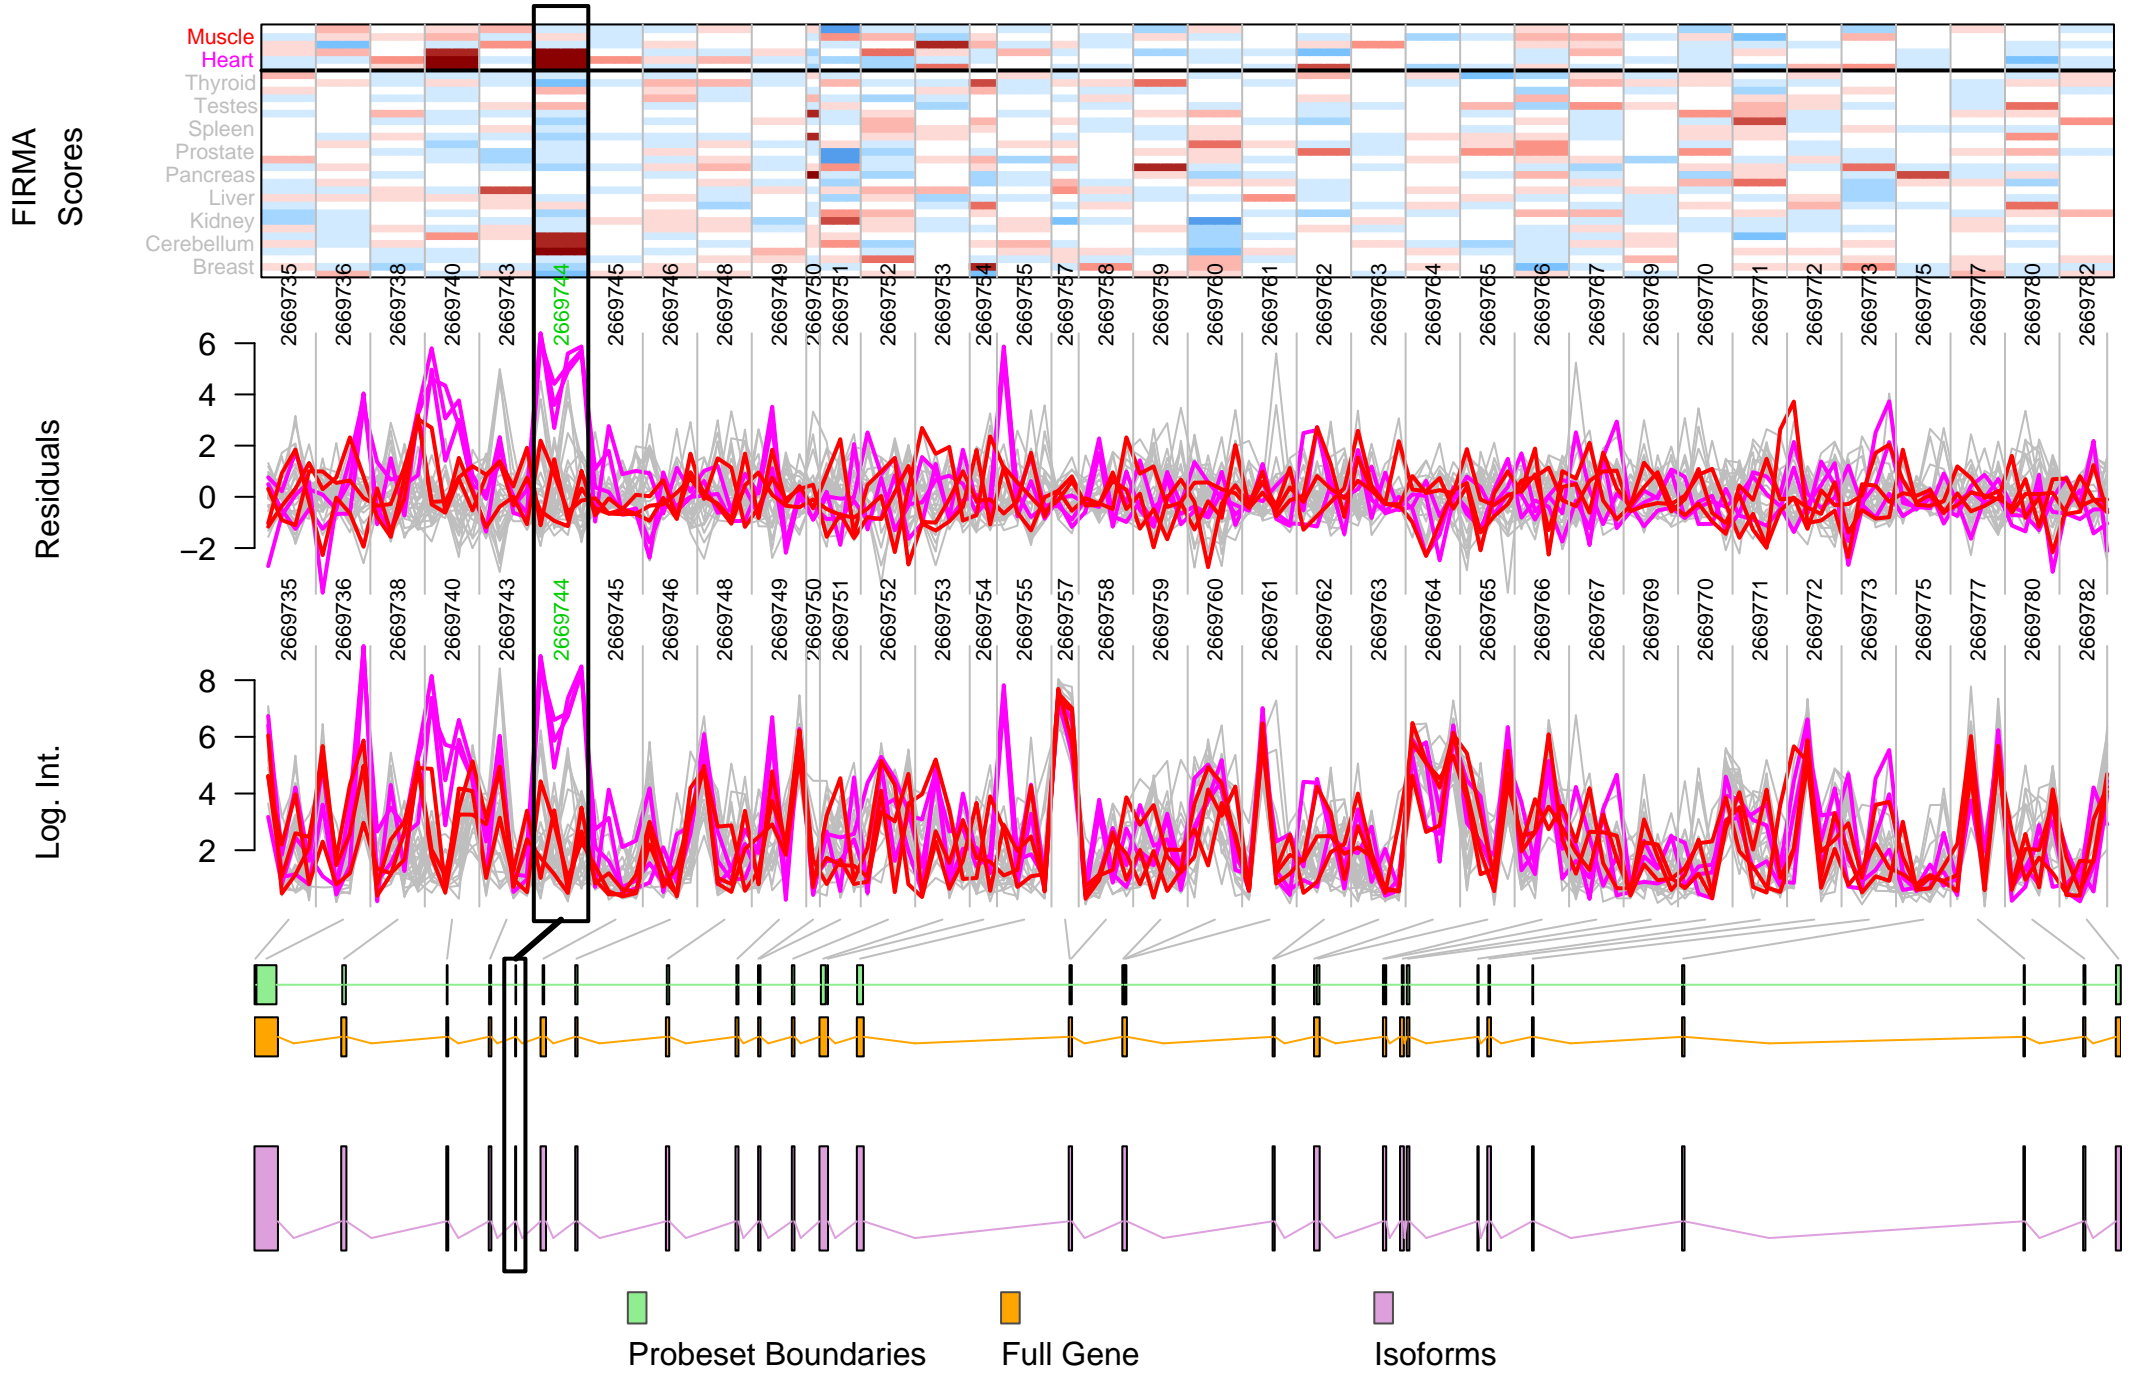

# ENSG00000047849 – MAP4

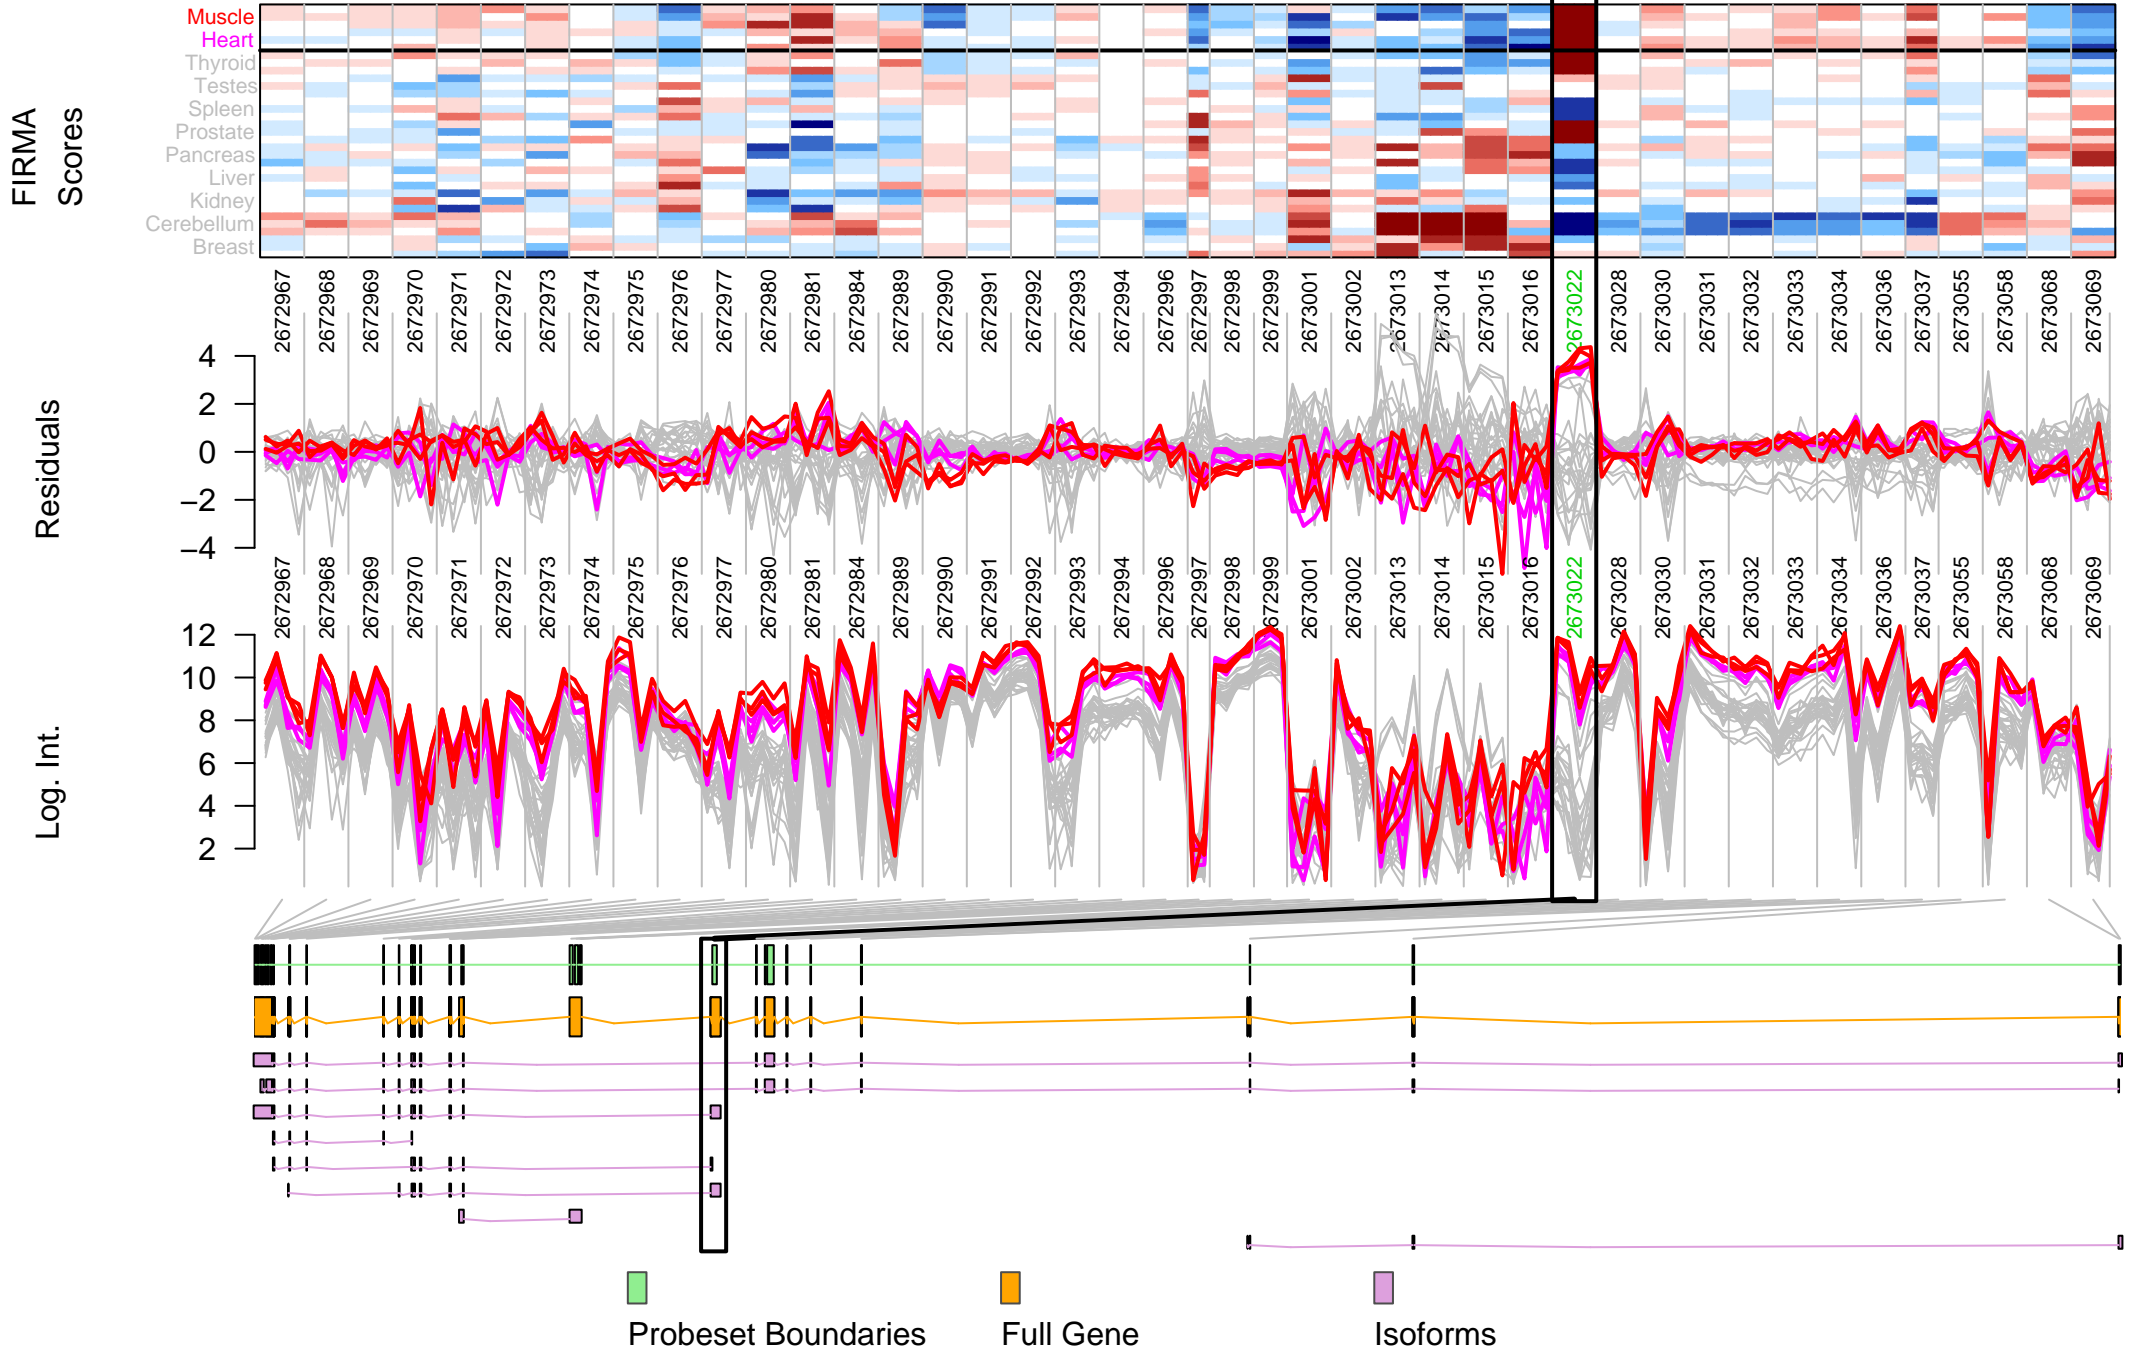

# ENSG00000140718 - FTO

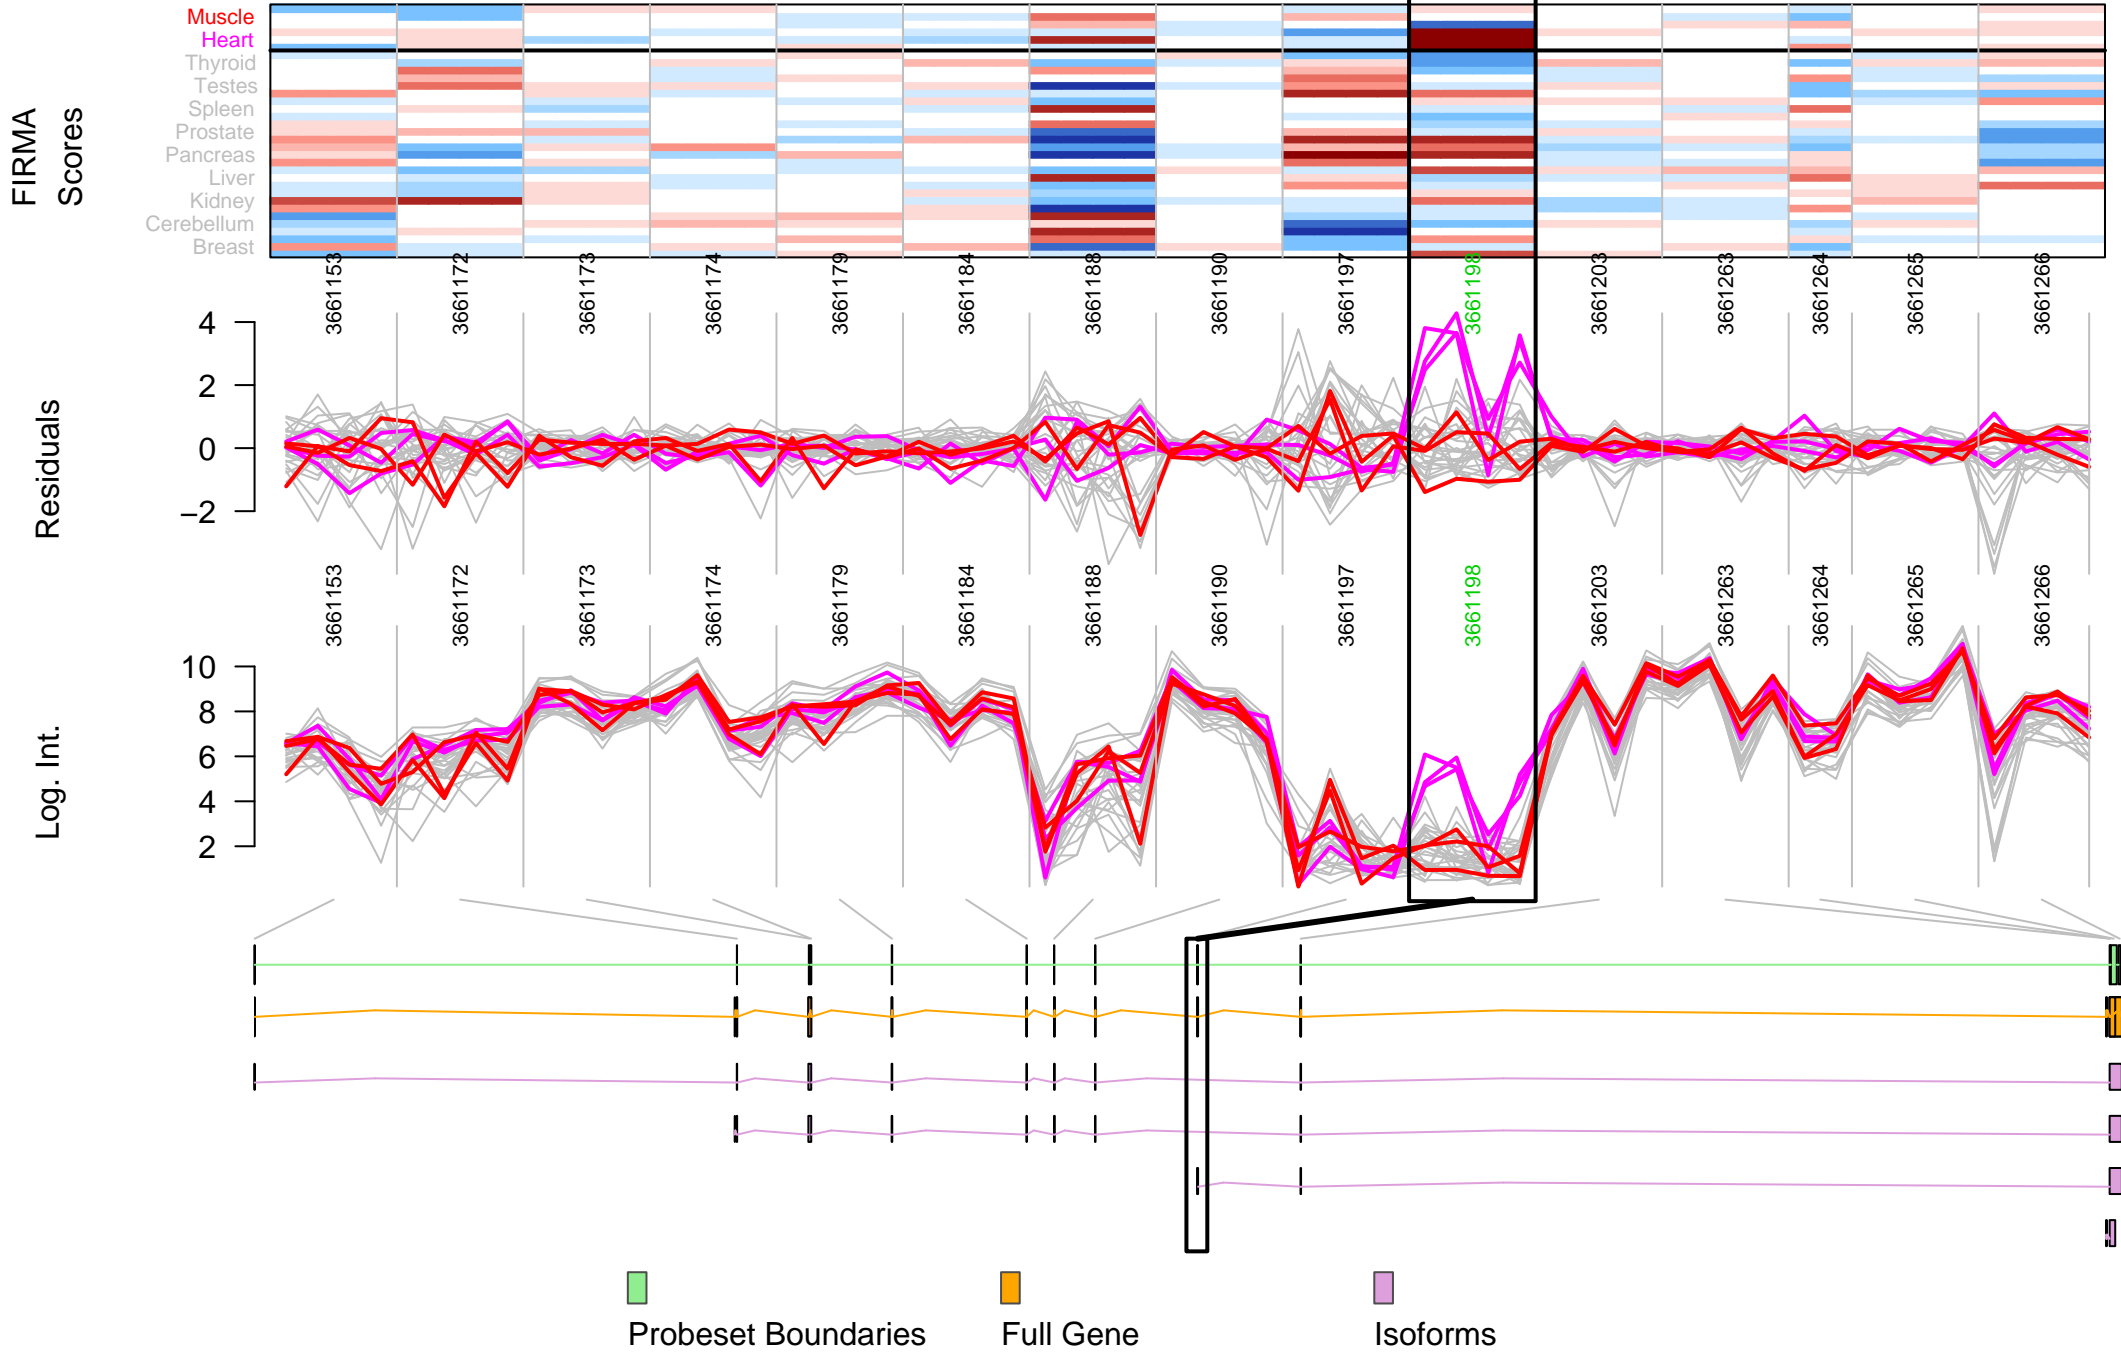

# ENSG00000118705 – RPN2

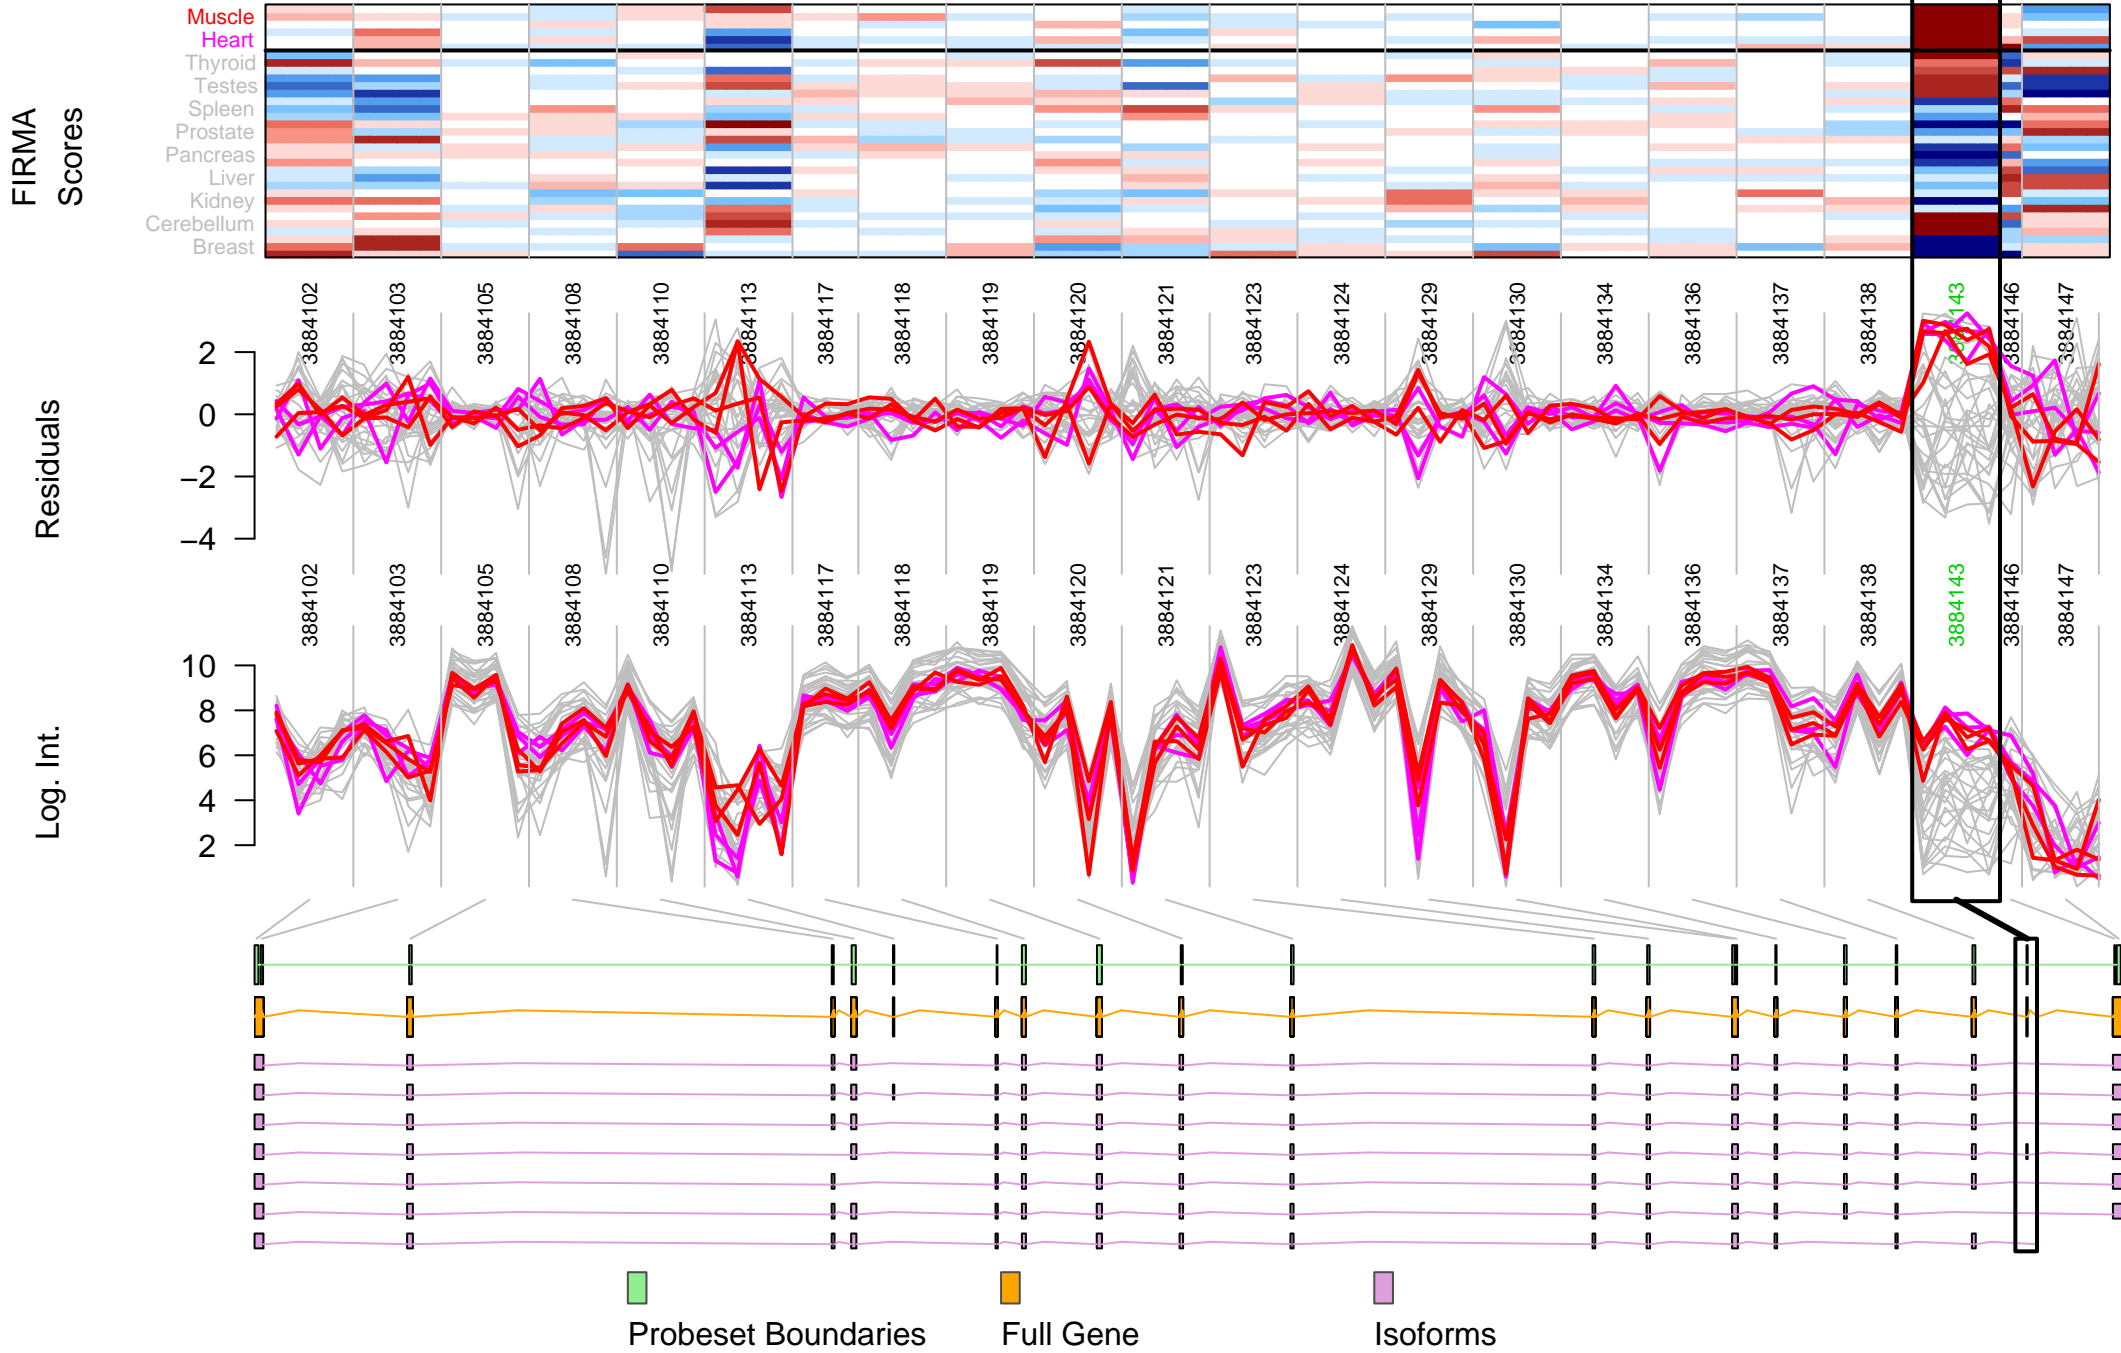

ENSG00000213763 -

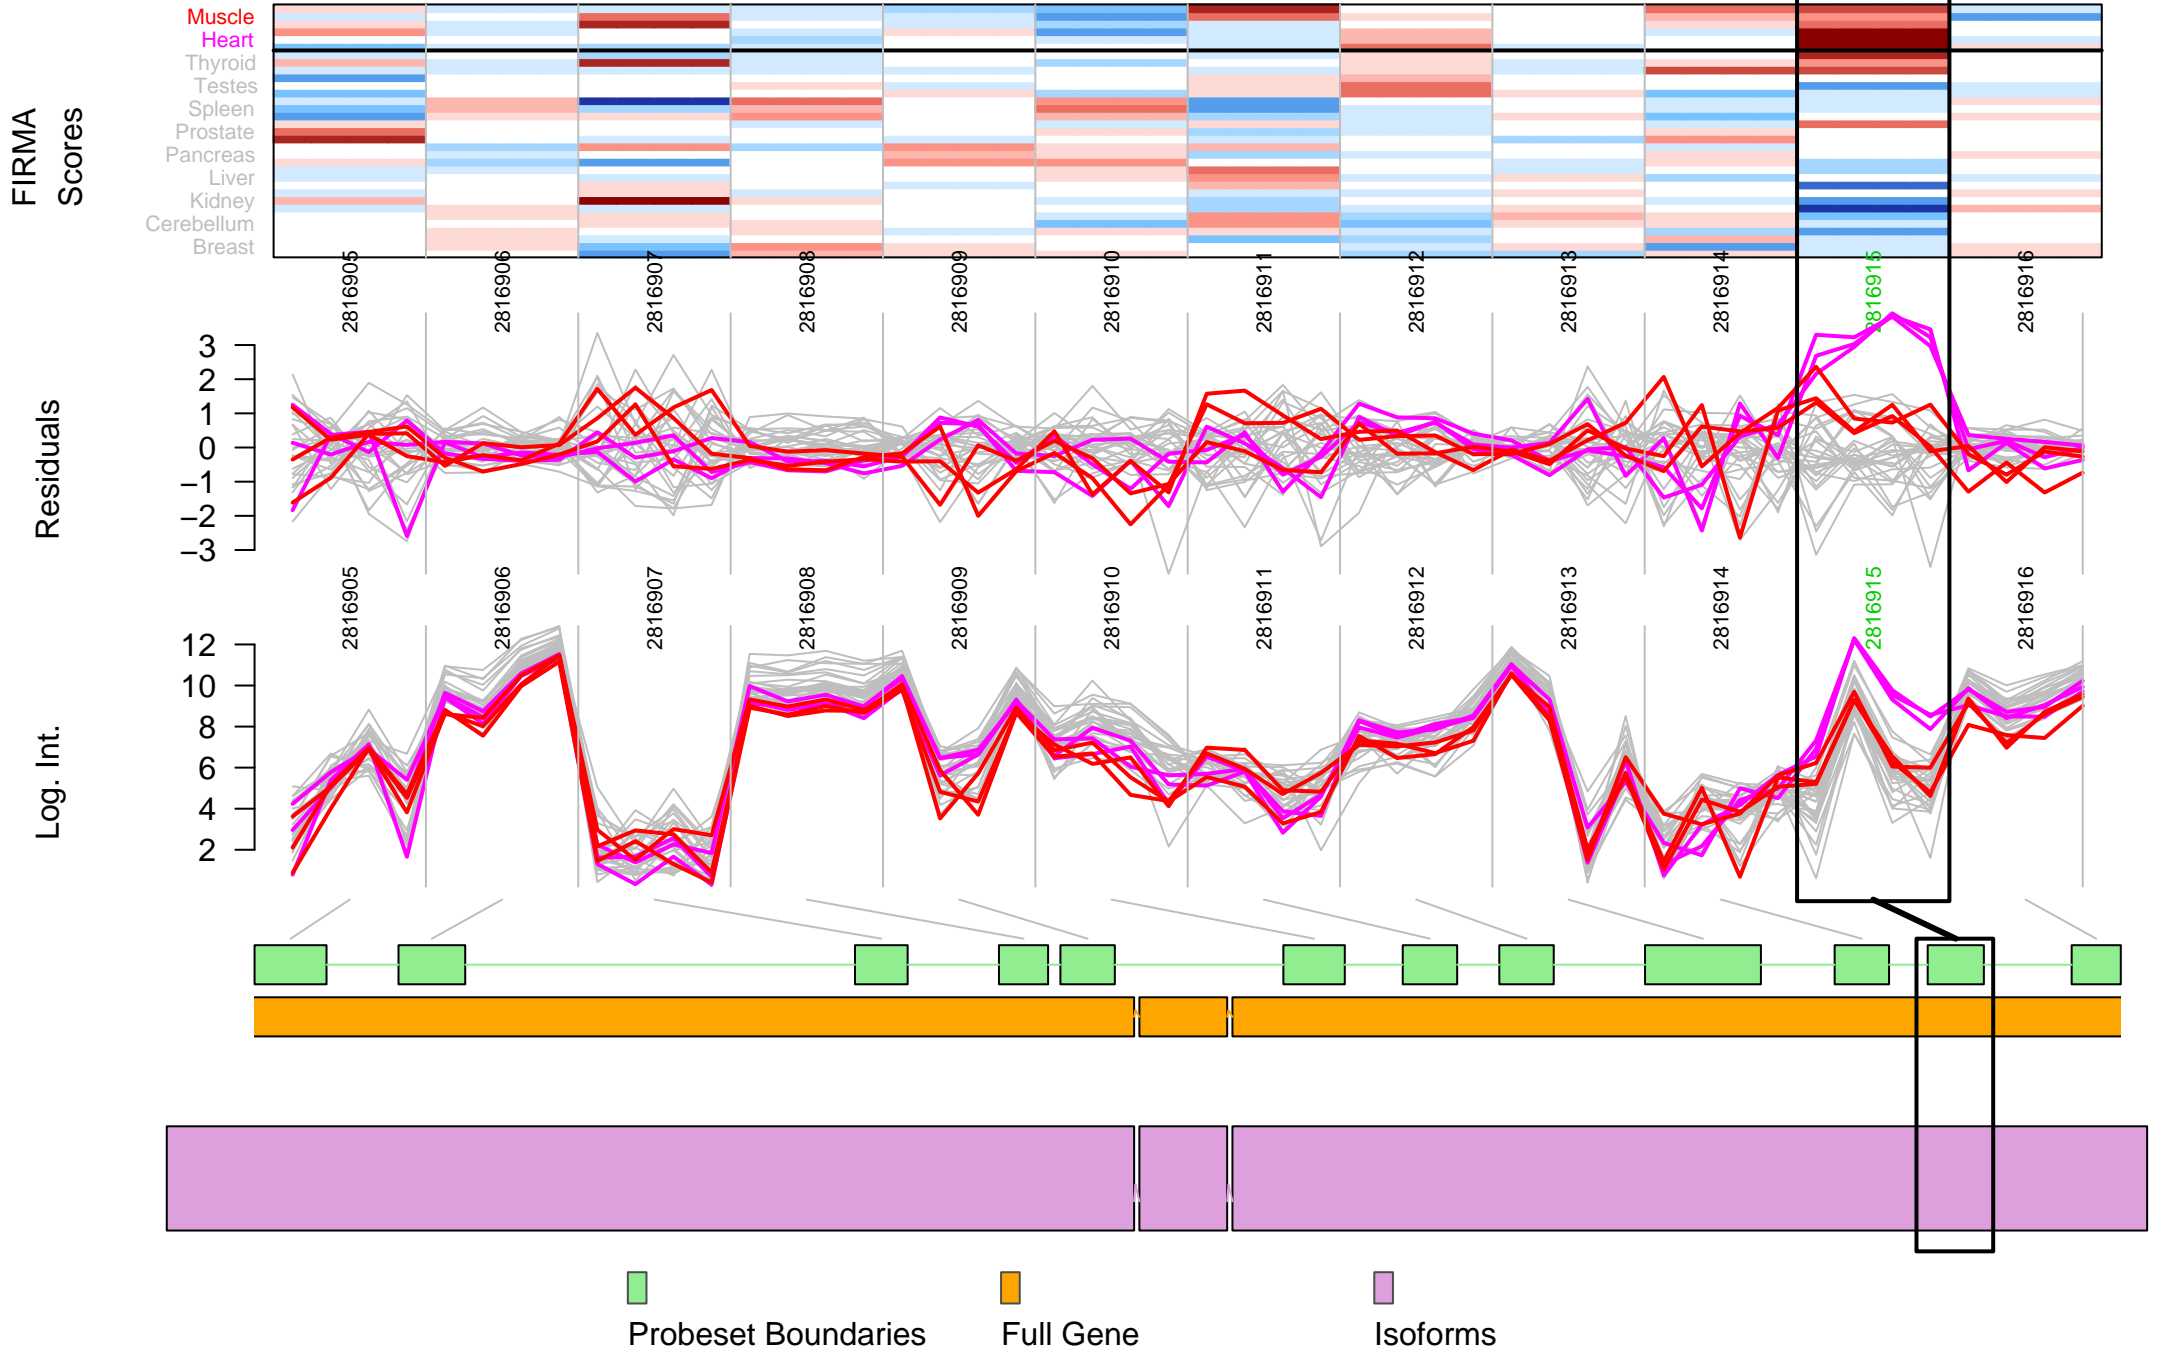

ENSG00000175224 – KIAA0652

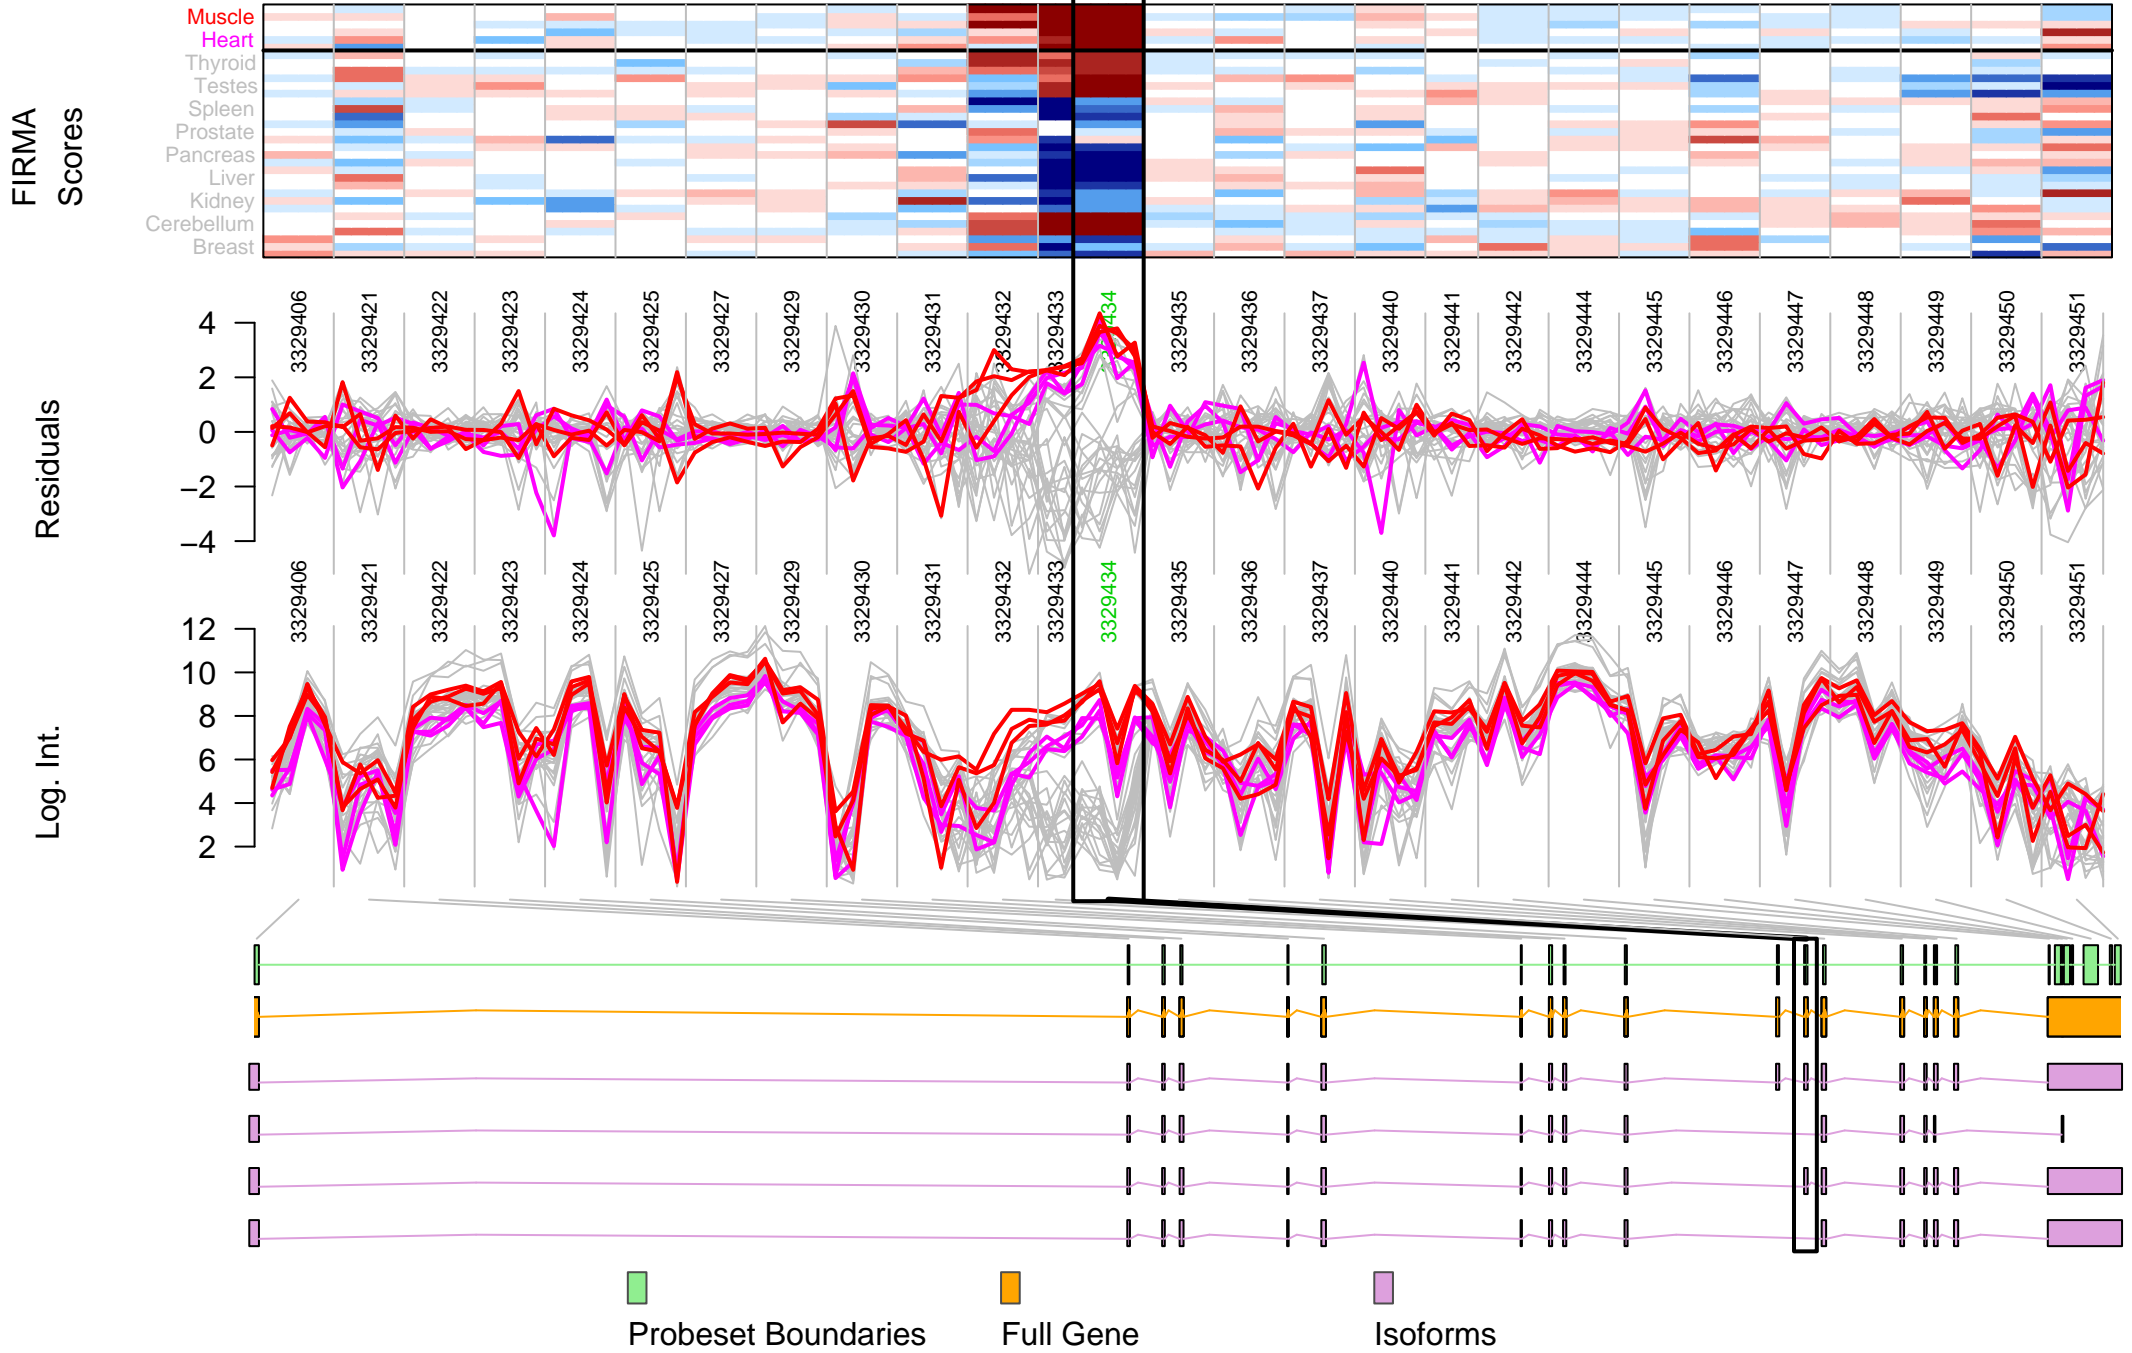

Supplement: btn284_2.pdf [file btn284_2.pdf]
