# Supplementary material for: FIRMA: a method for detection of alternative splicing from exon array data
Source: PubMed Central journal article supplement — Bioinformatics. 2008 Jun 23;24(15):1707–14. doi: 10.1093/bioinformatics/btn284 (PMC2638867; doi:10.1093/bioinformatics/btn284), 2008-06-23

# FIRMA Scores of ENSG0000099204 – ABLIM1

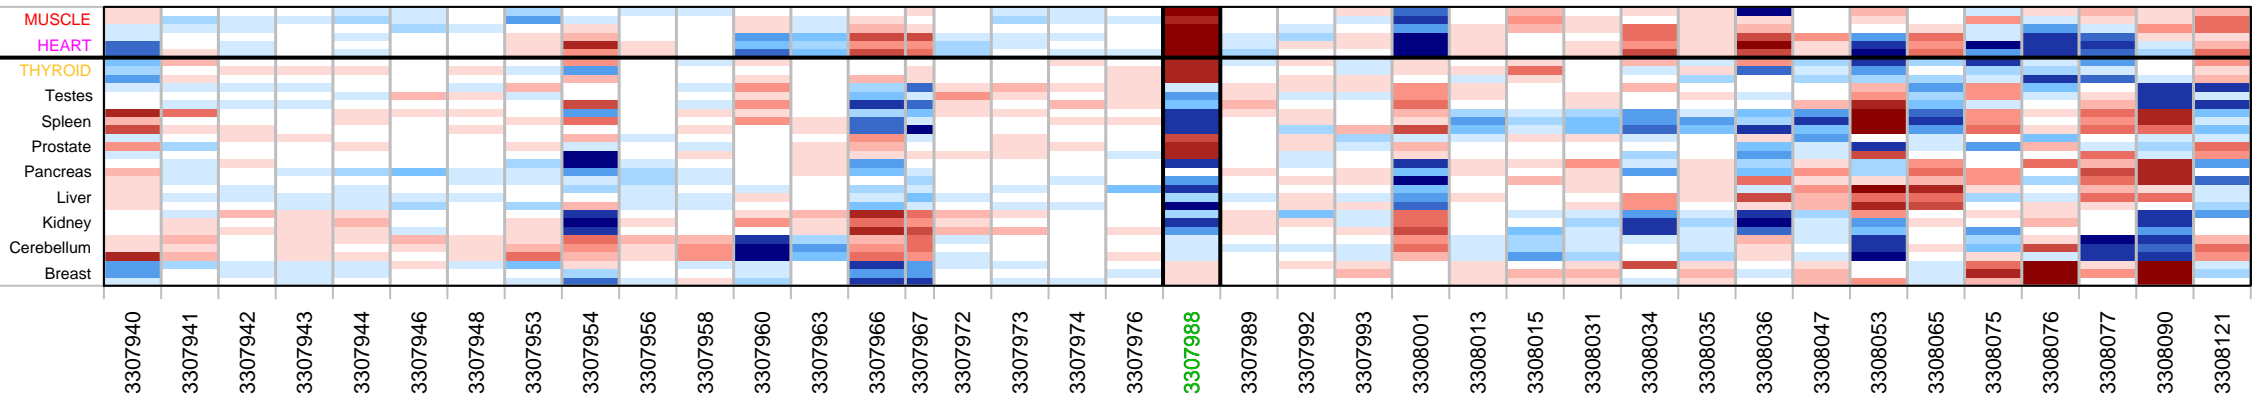

## Residuals

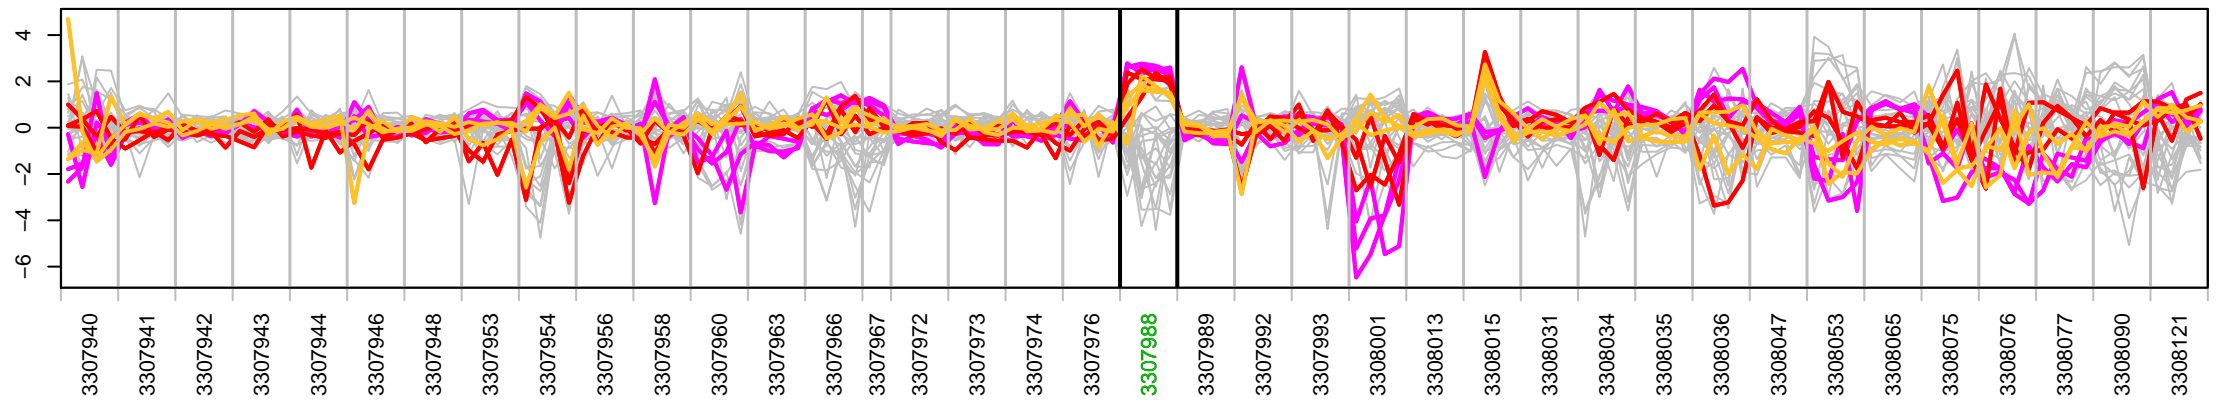

## Normalized Log Intensities

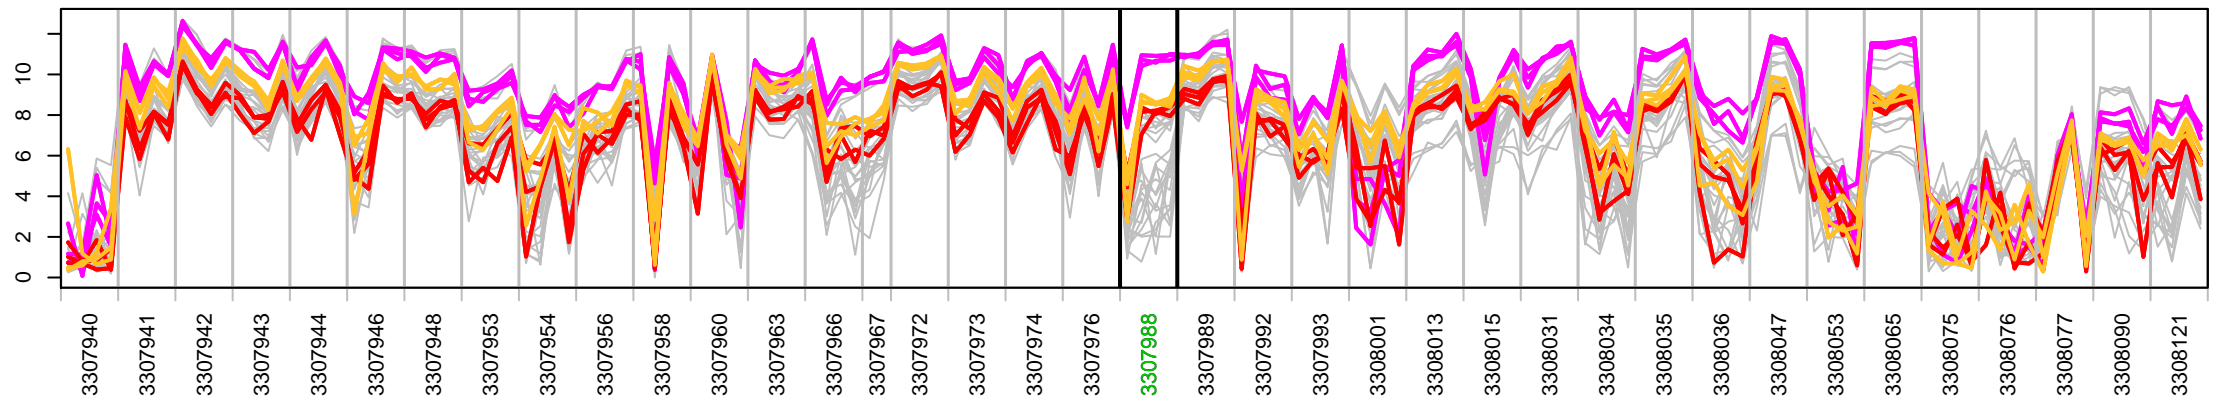

# FIRMA Scores of ENSG0000131069 – ACAS2

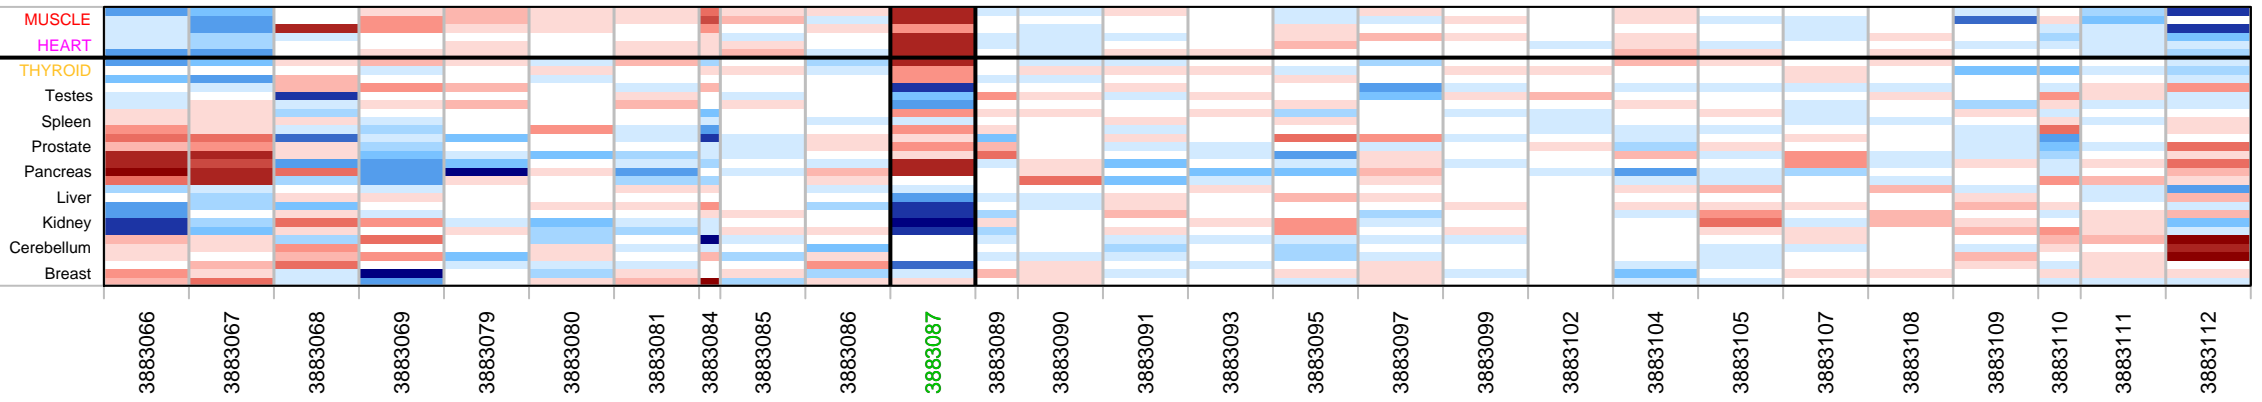

## Residuals

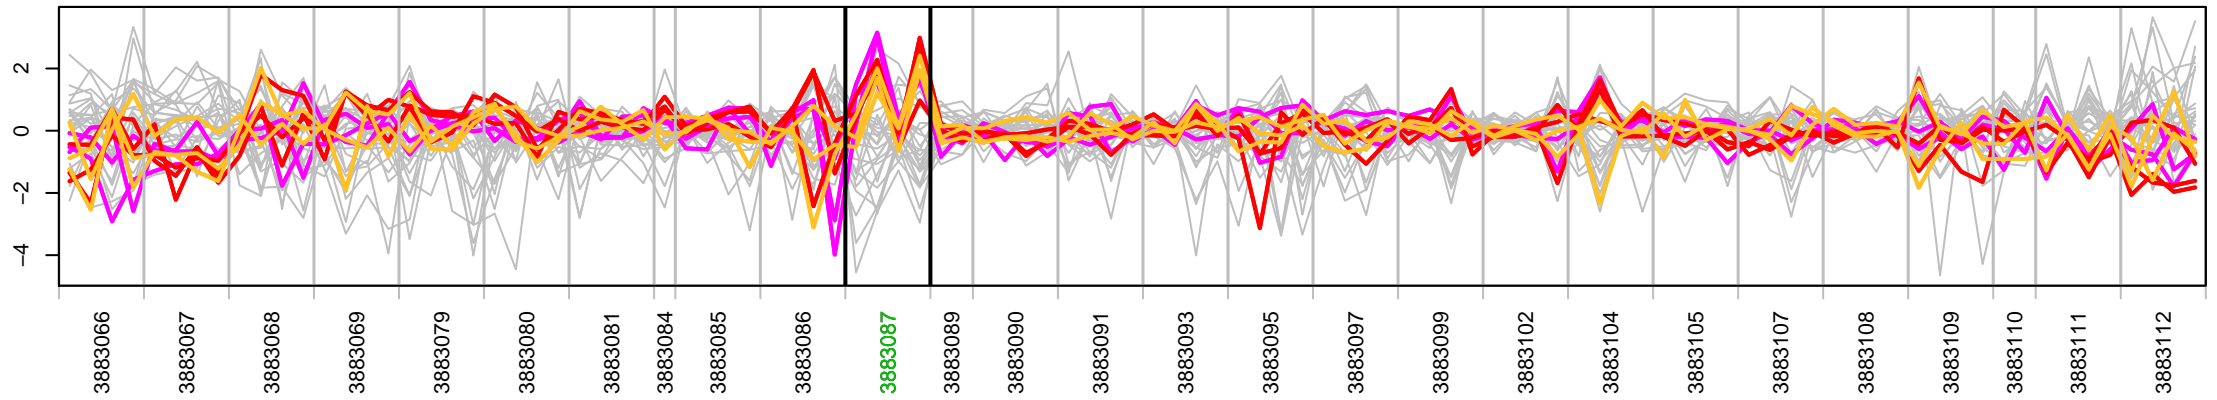

## Normalized Log Intensities

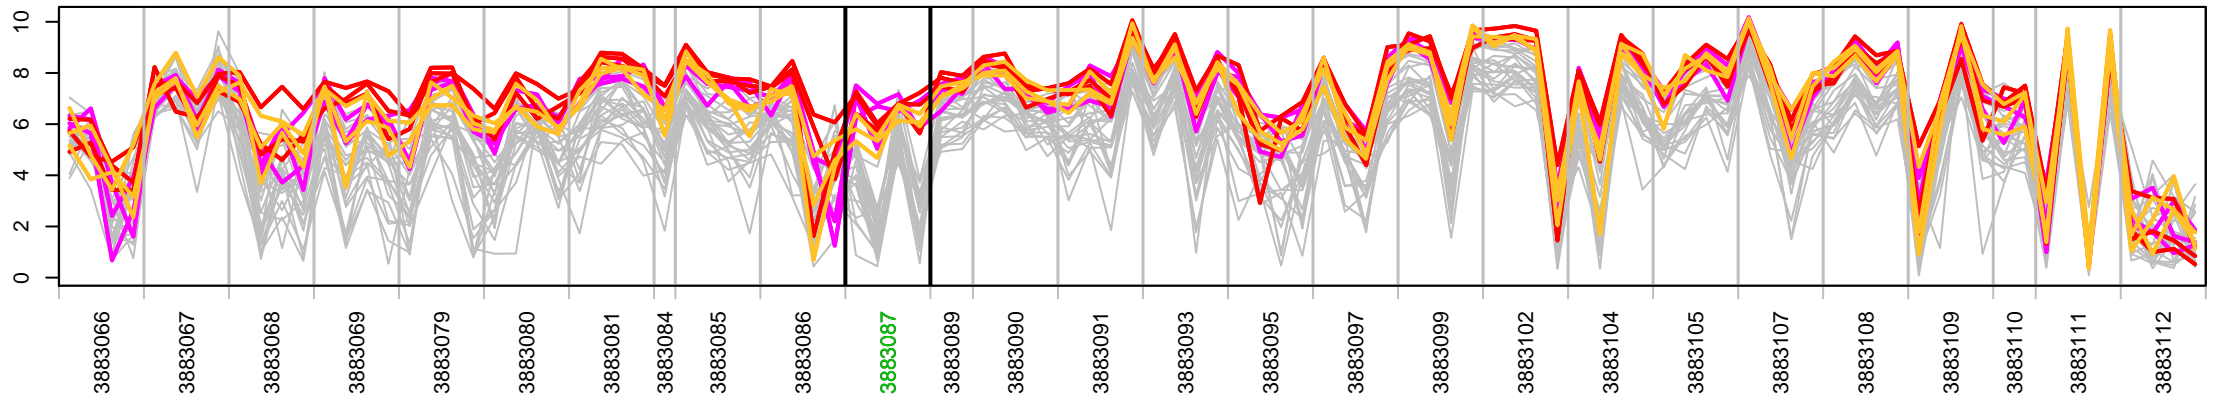

# FIRMA Scores of ENSG0000067191 – CACNB1

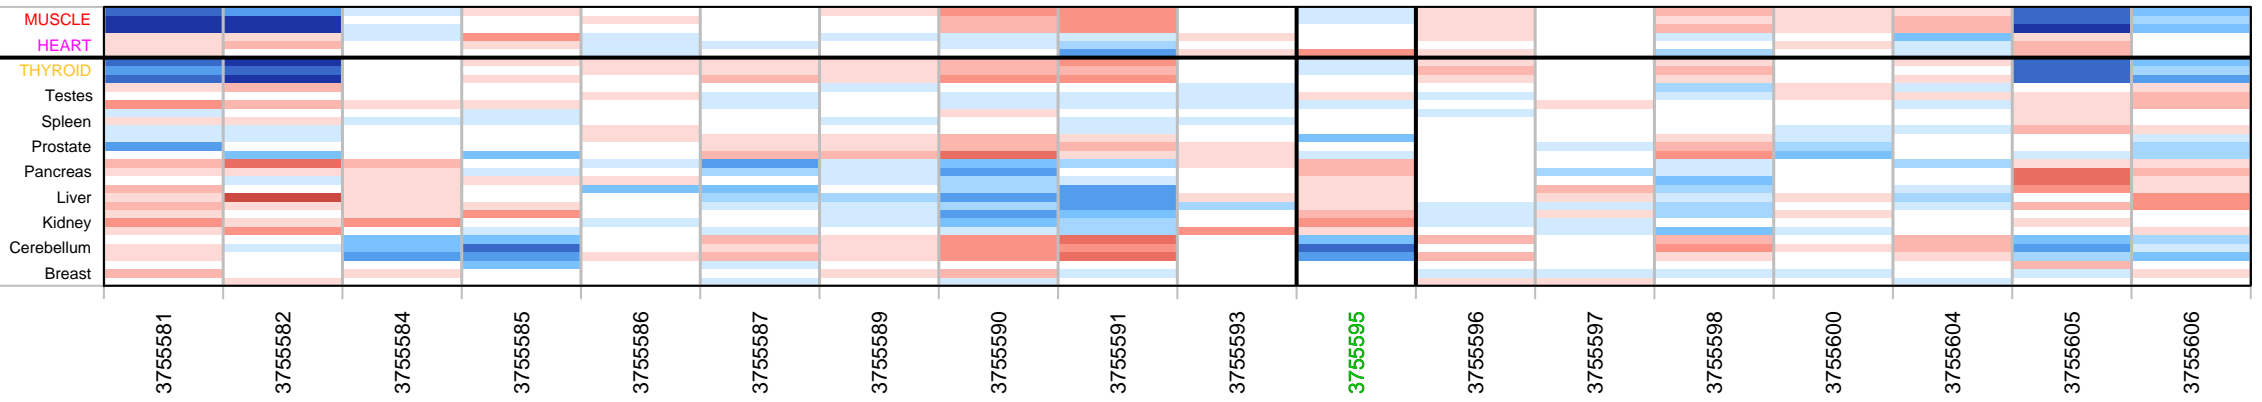

## Residuals

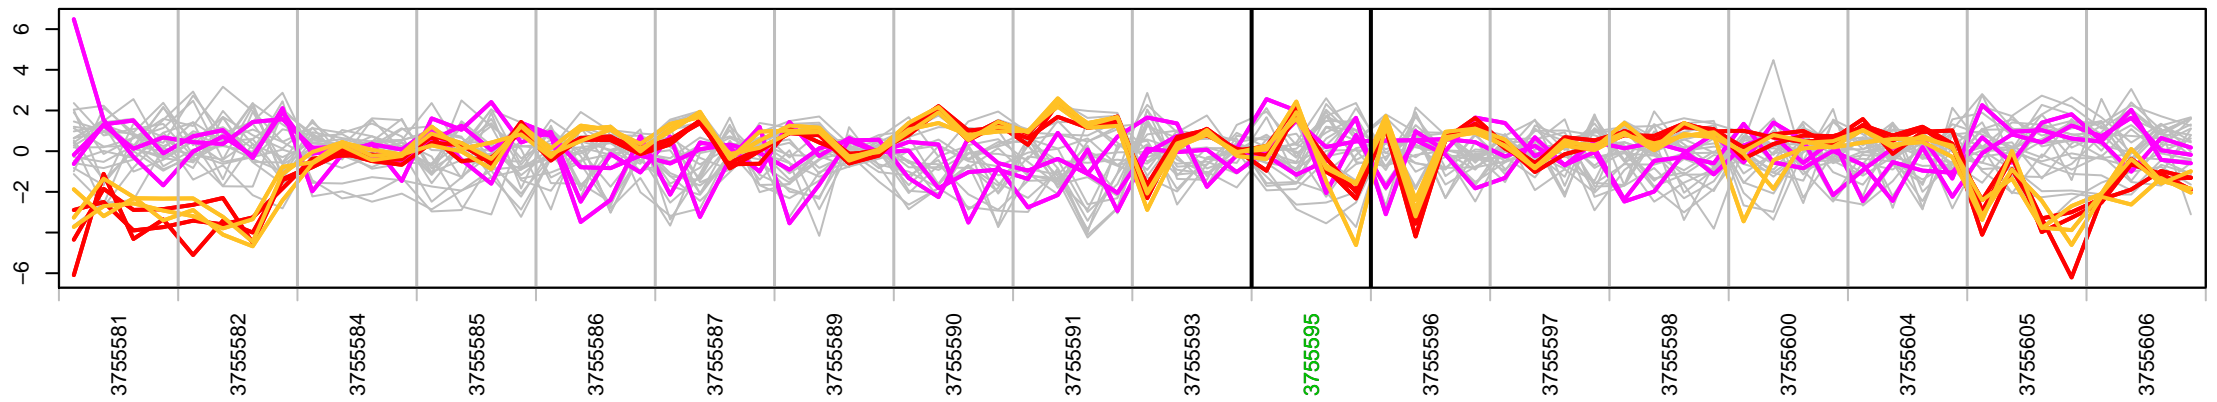

## Normalized Log Intensities

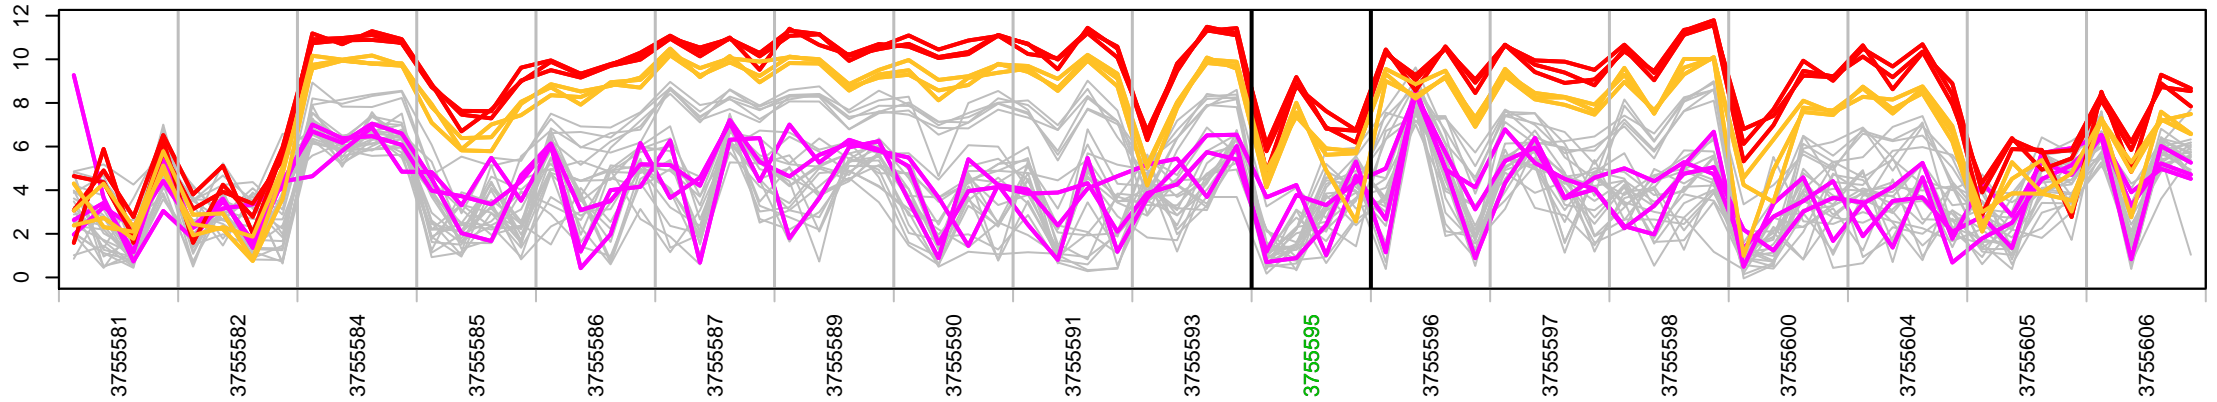

# FIRMA Scores of ENSG0000135636 – DYSF

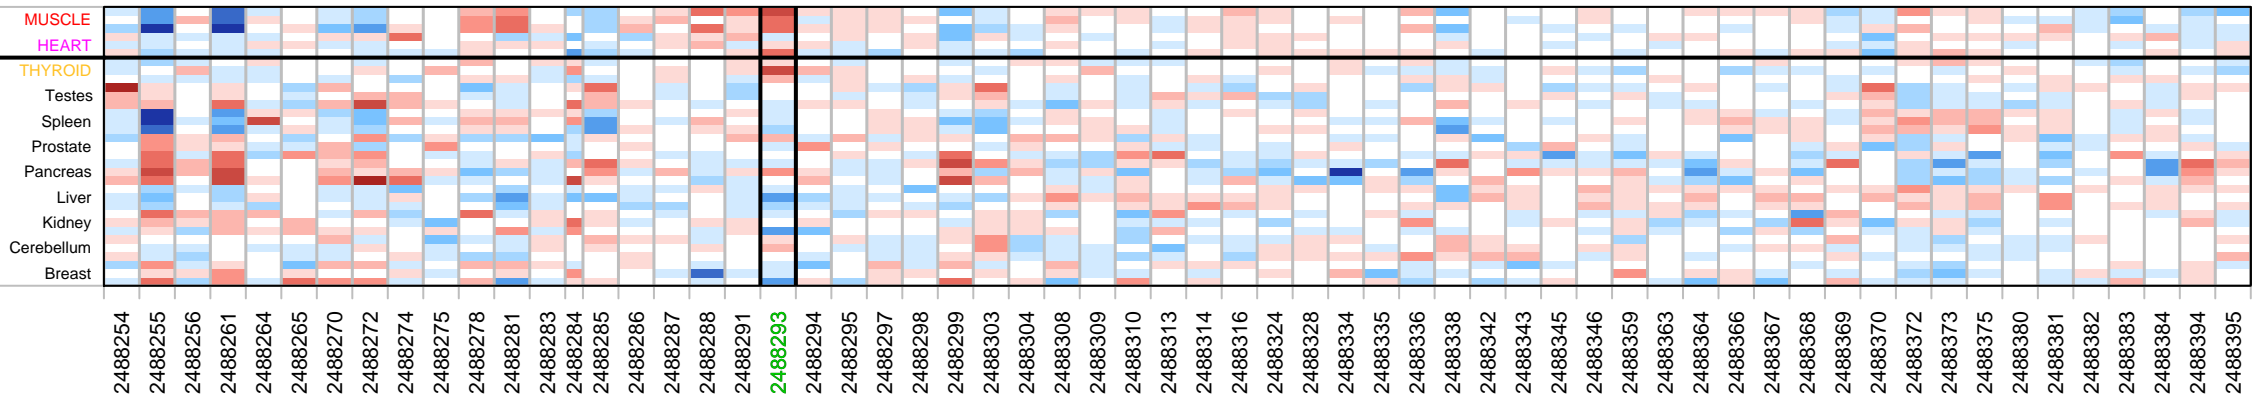

## Residuals

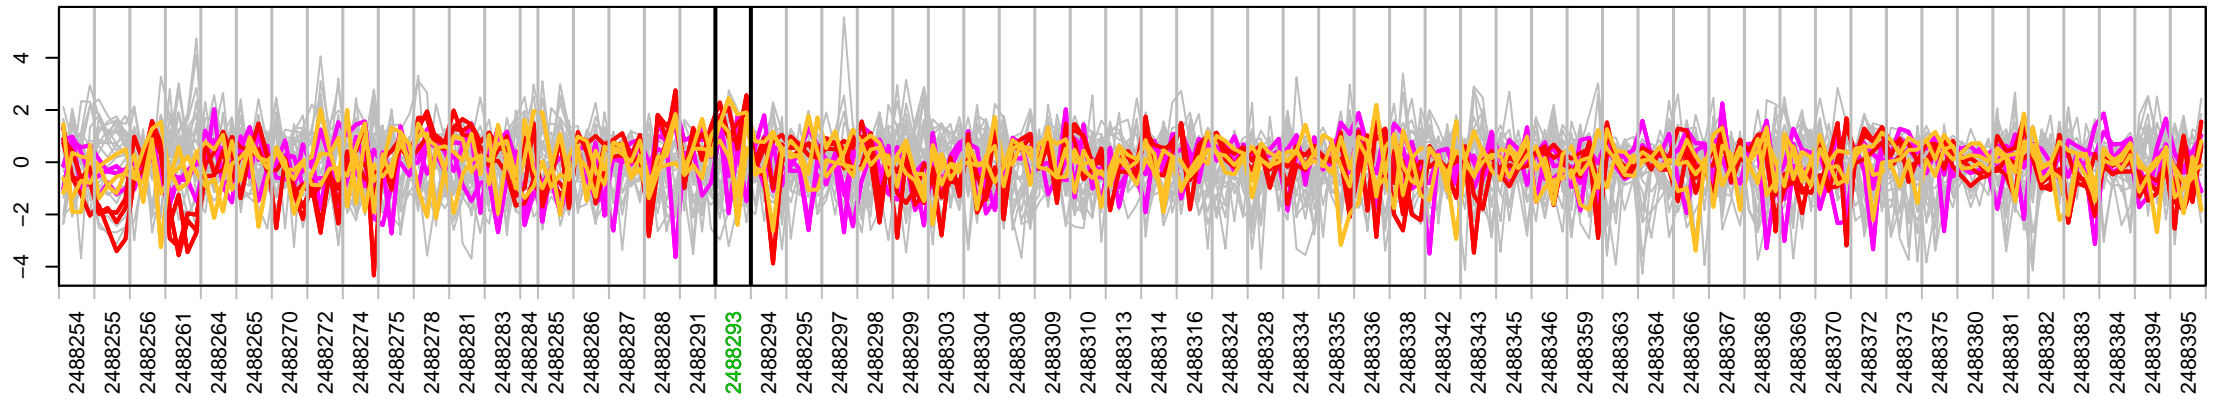

## Normalized Log Intensities

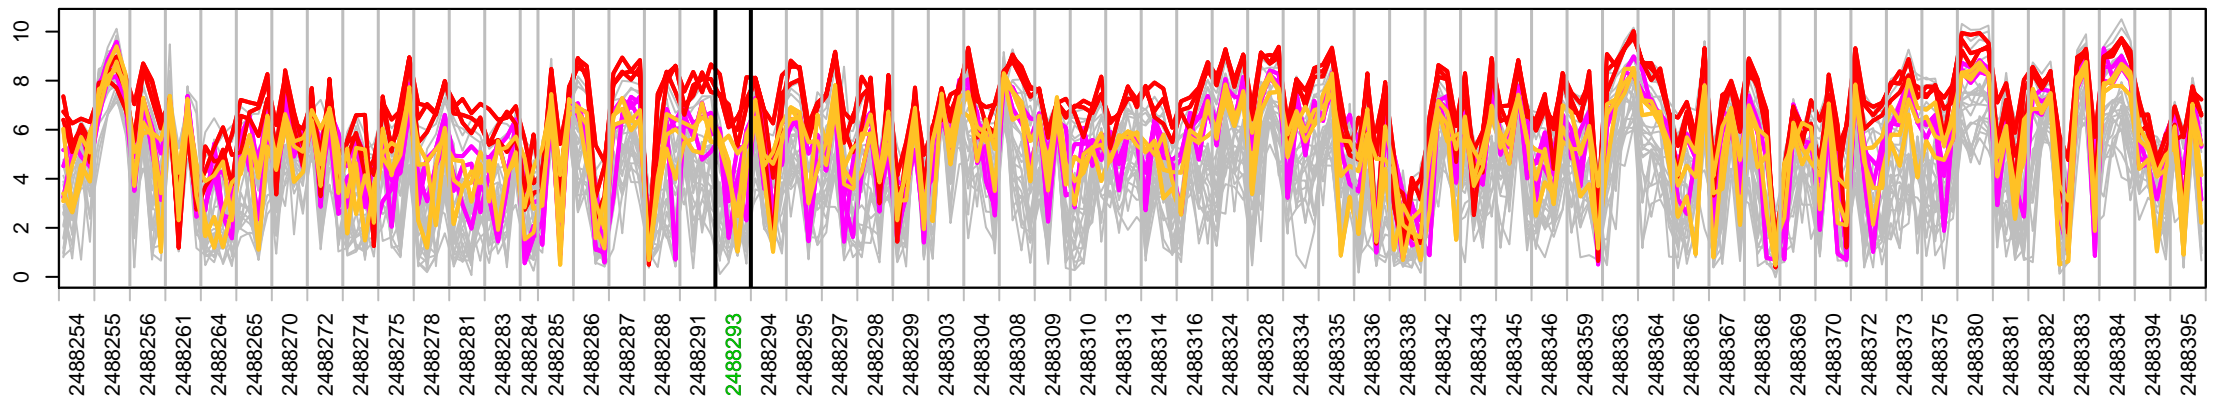

# FIRMA Scores of ENSG0000150093 – ITGB1

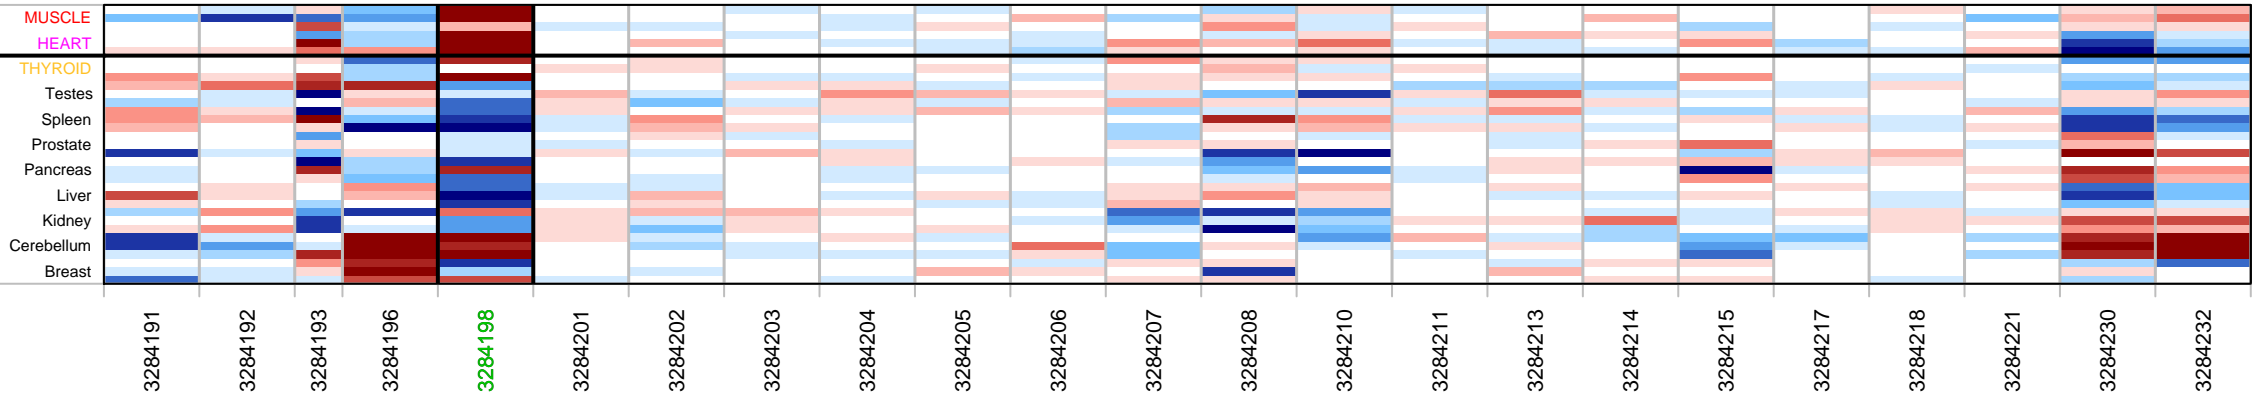

## Residuals

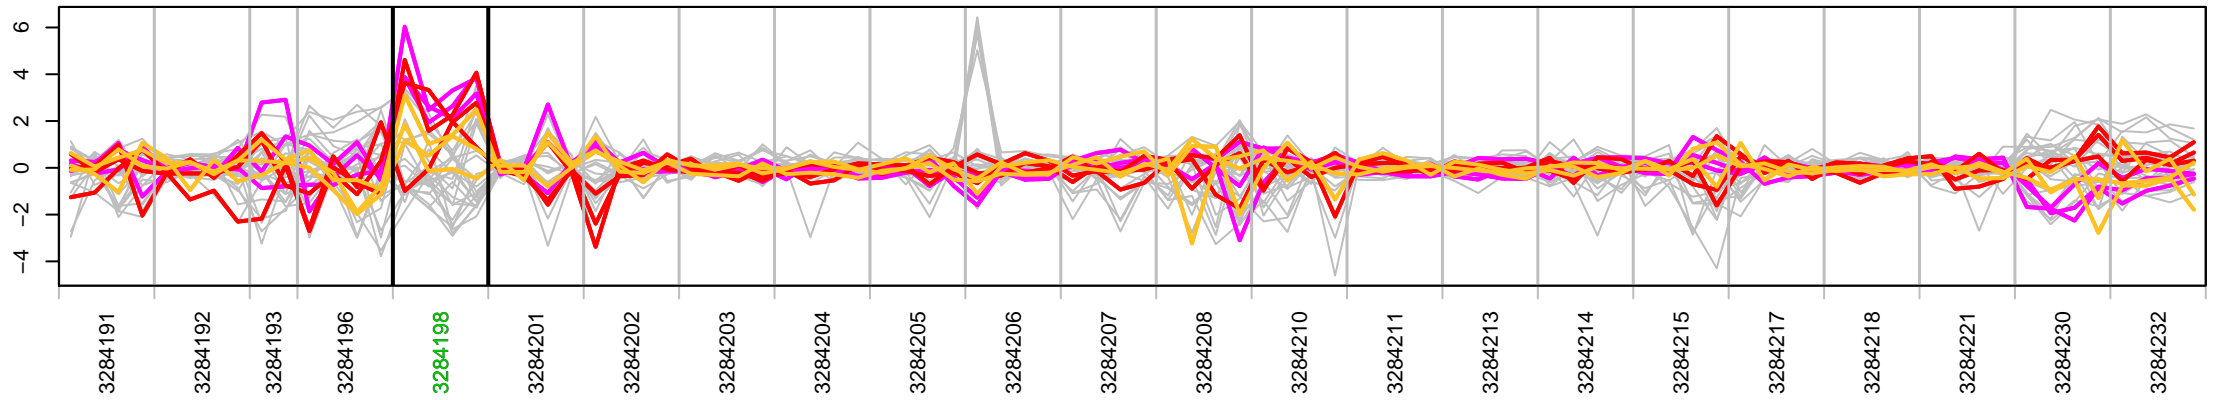

## Normalized Log Intensities

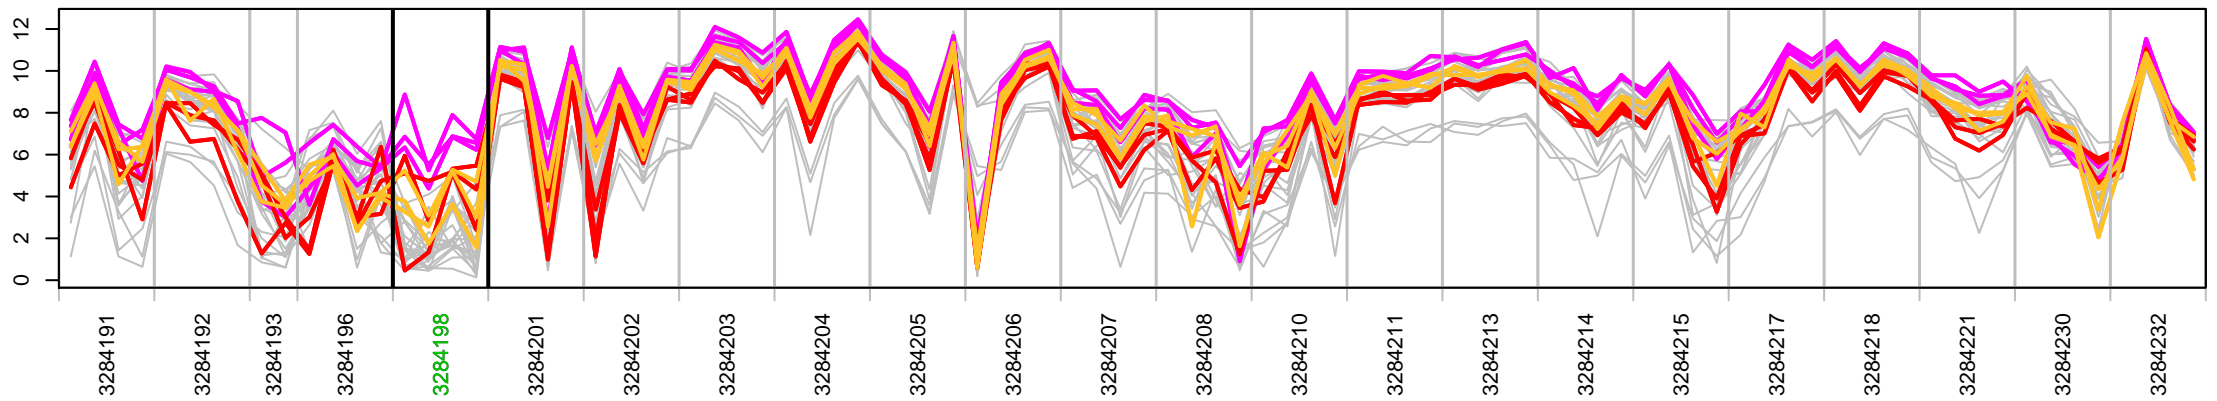

# FIRMA Scores of ENSG00000124831 – LRRFIP1

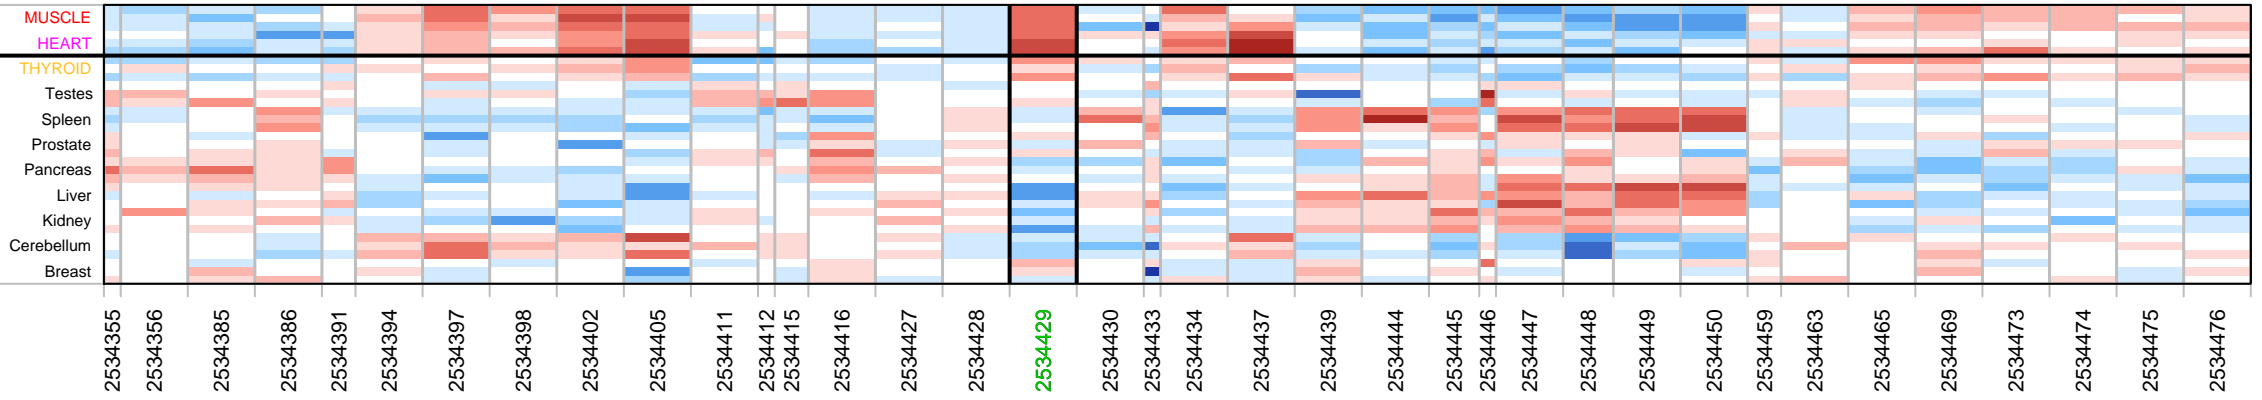

## Residuals

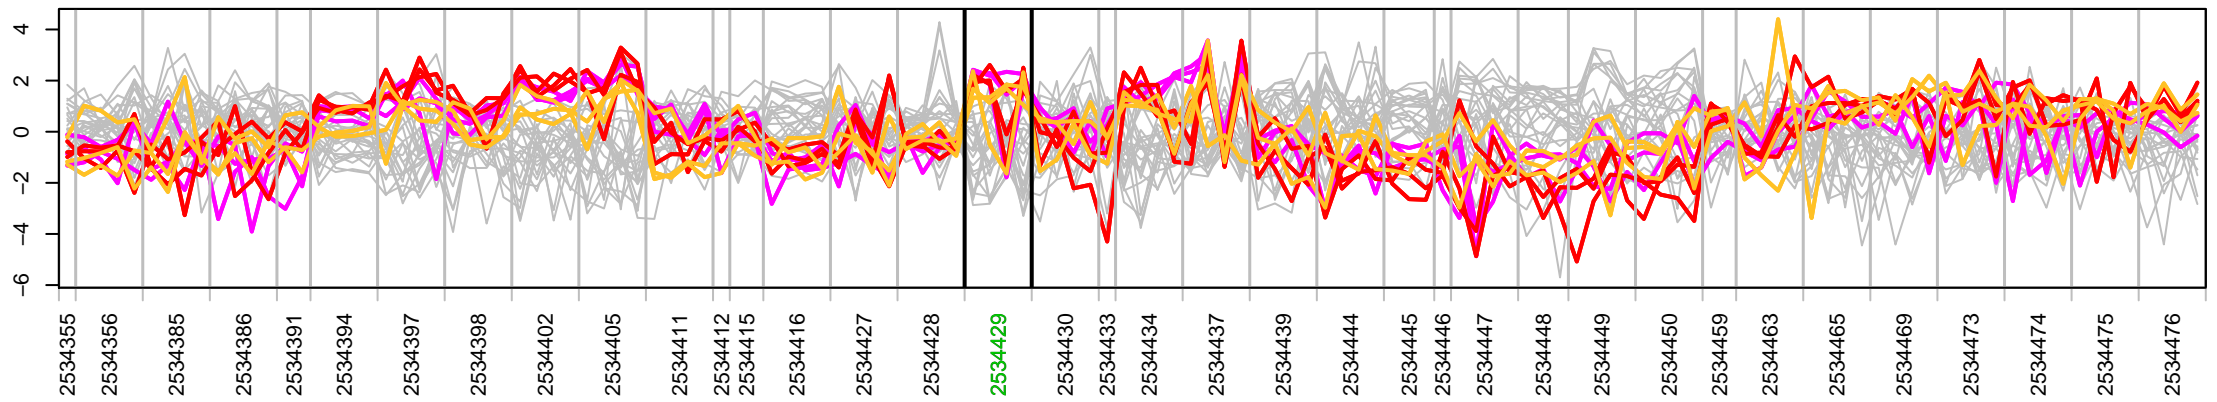

## Normalized Log Intensities

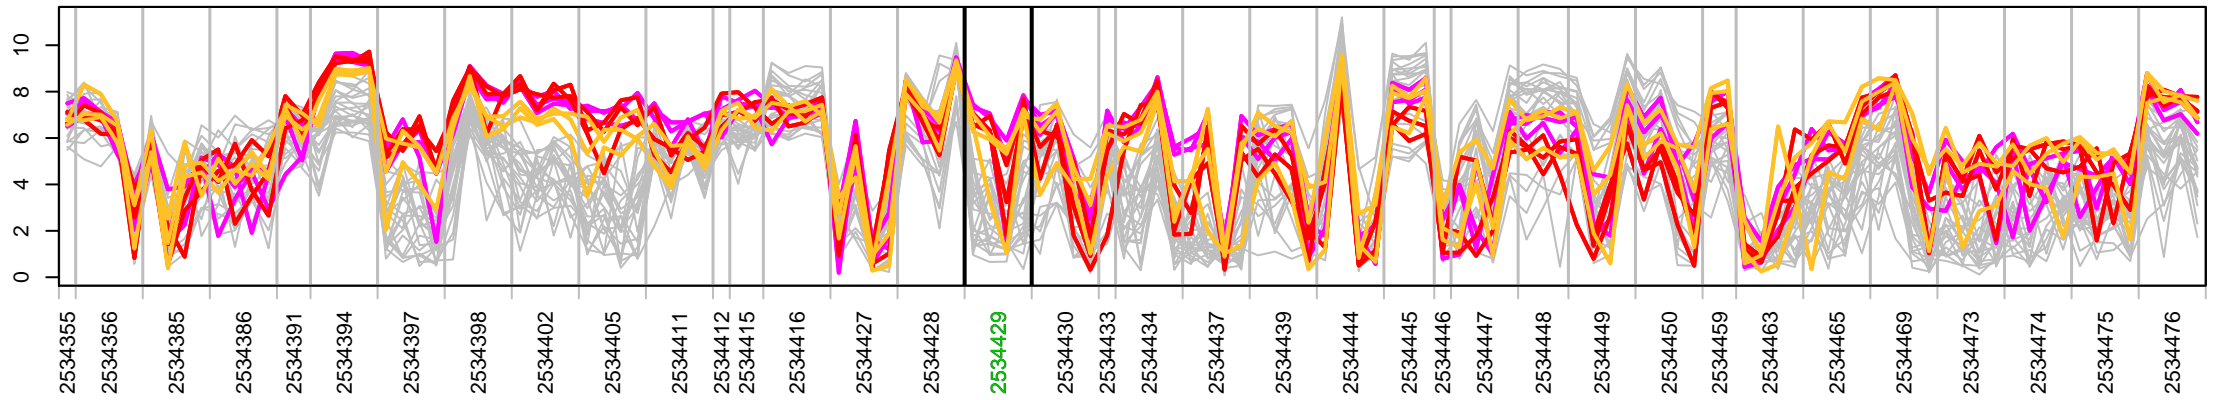

# FIRMA Scores of ENSG0000093167 – LRRFIP2

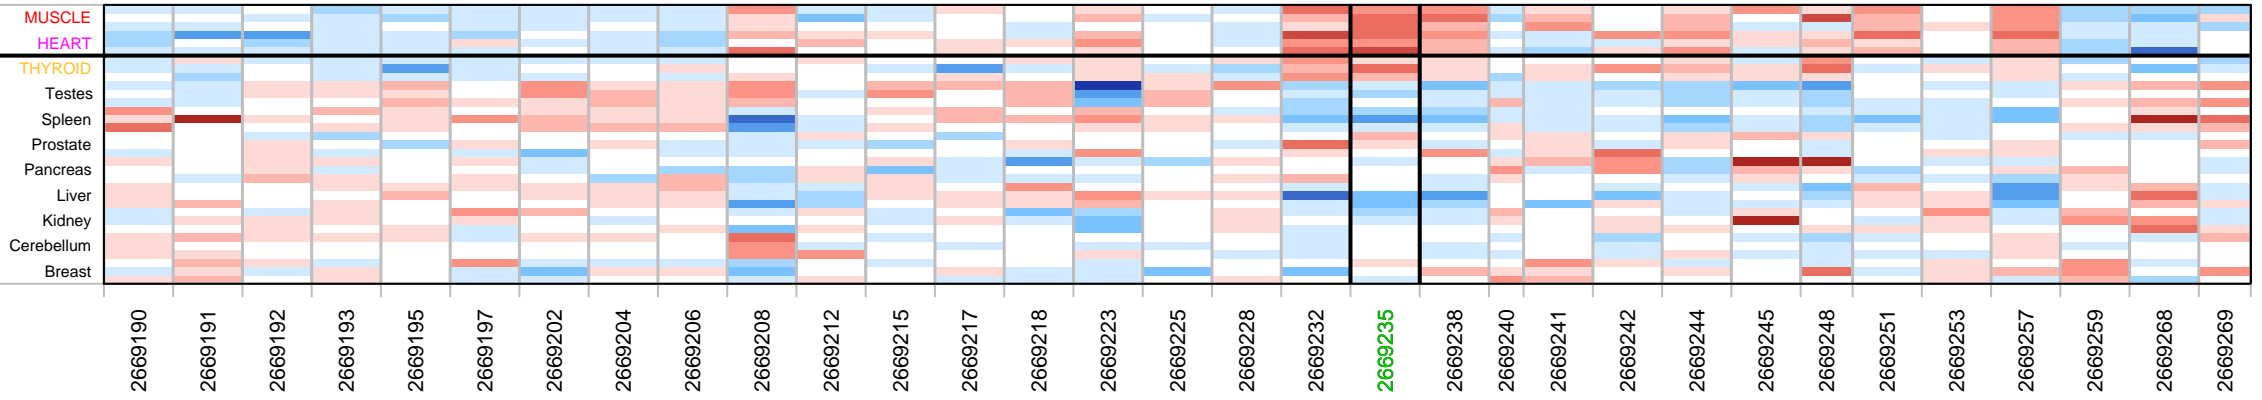

## Residuals

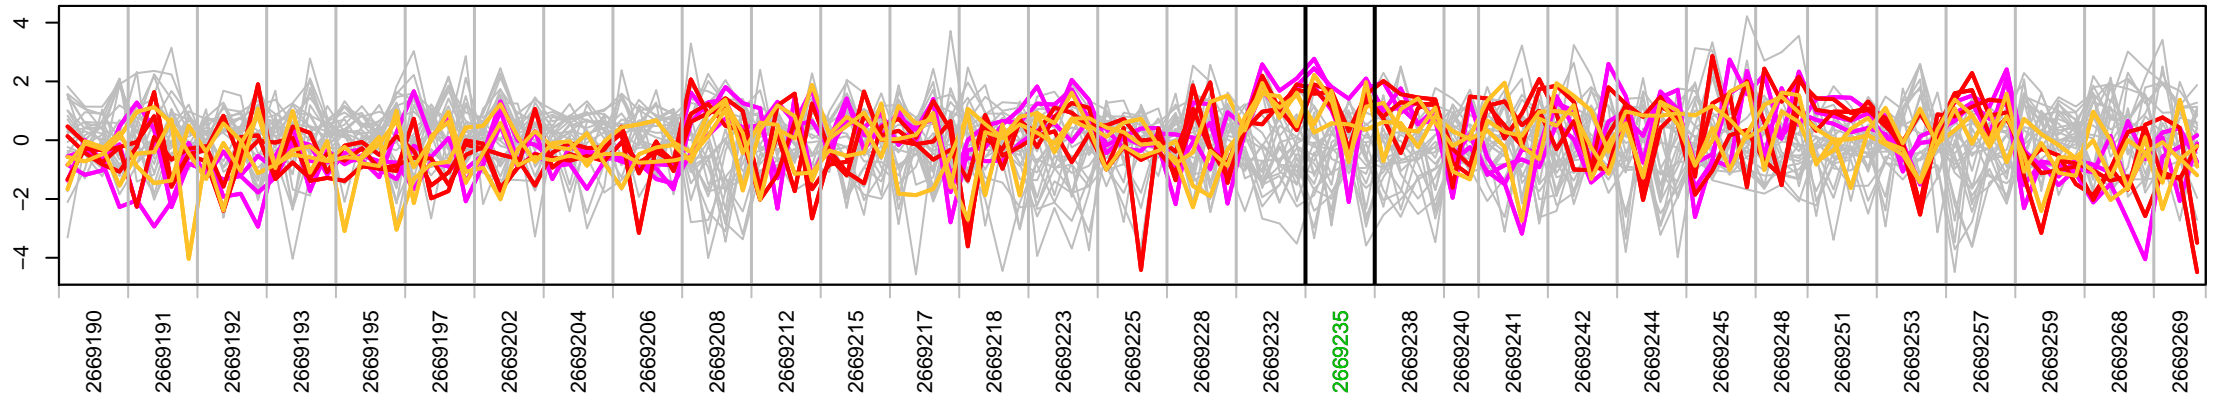

## Normalized Log Intensities

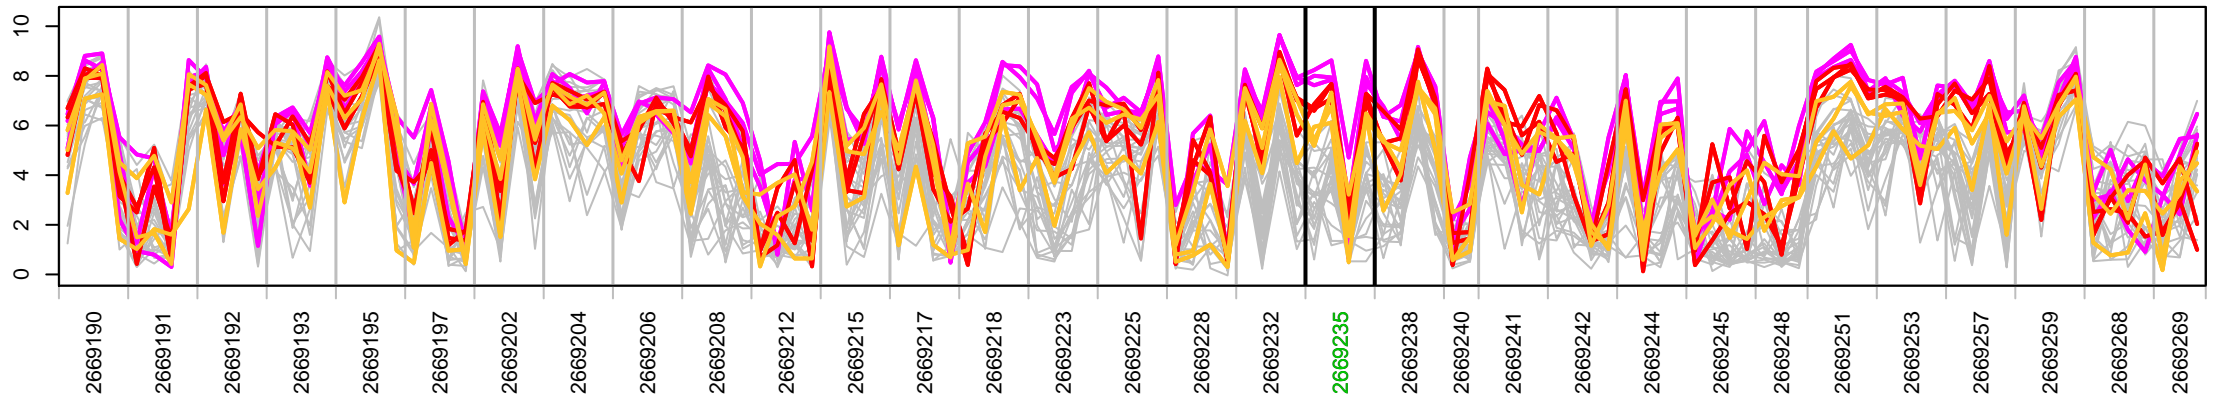

# FIRMA Scores of ENSG0000100330 – MTMR3

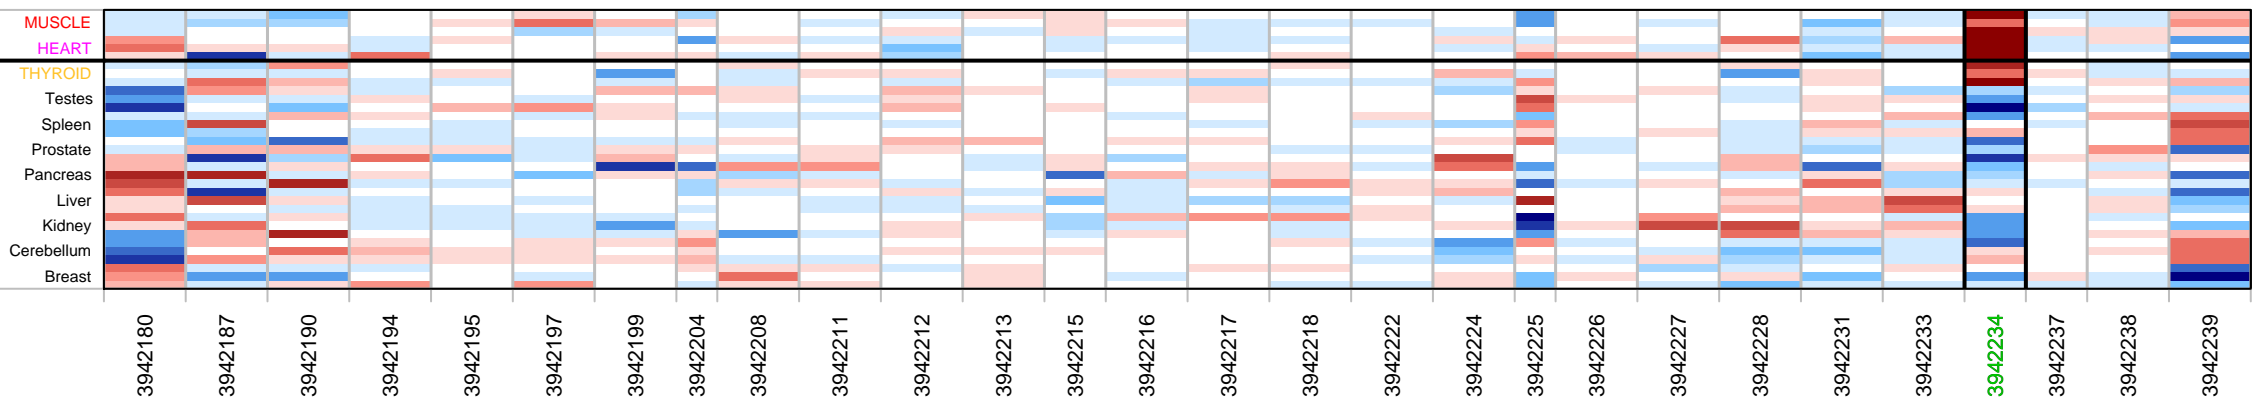

## Residuals

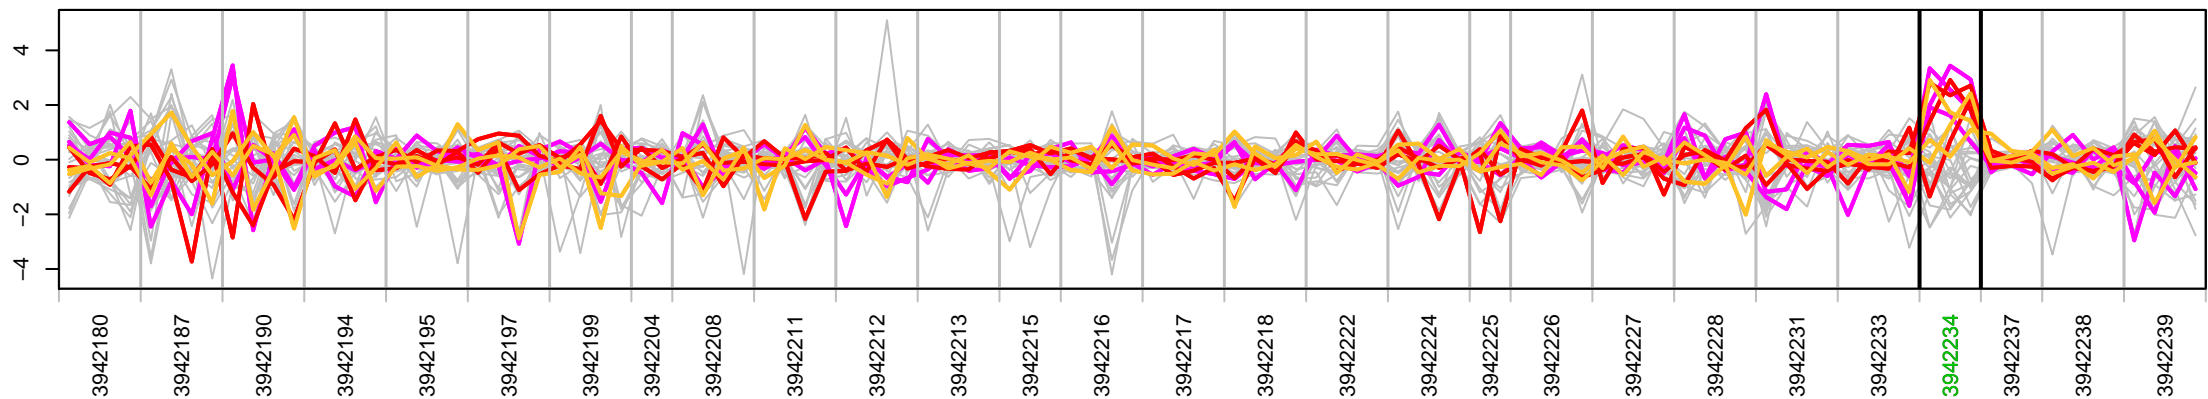

## Normalized Log Intensities

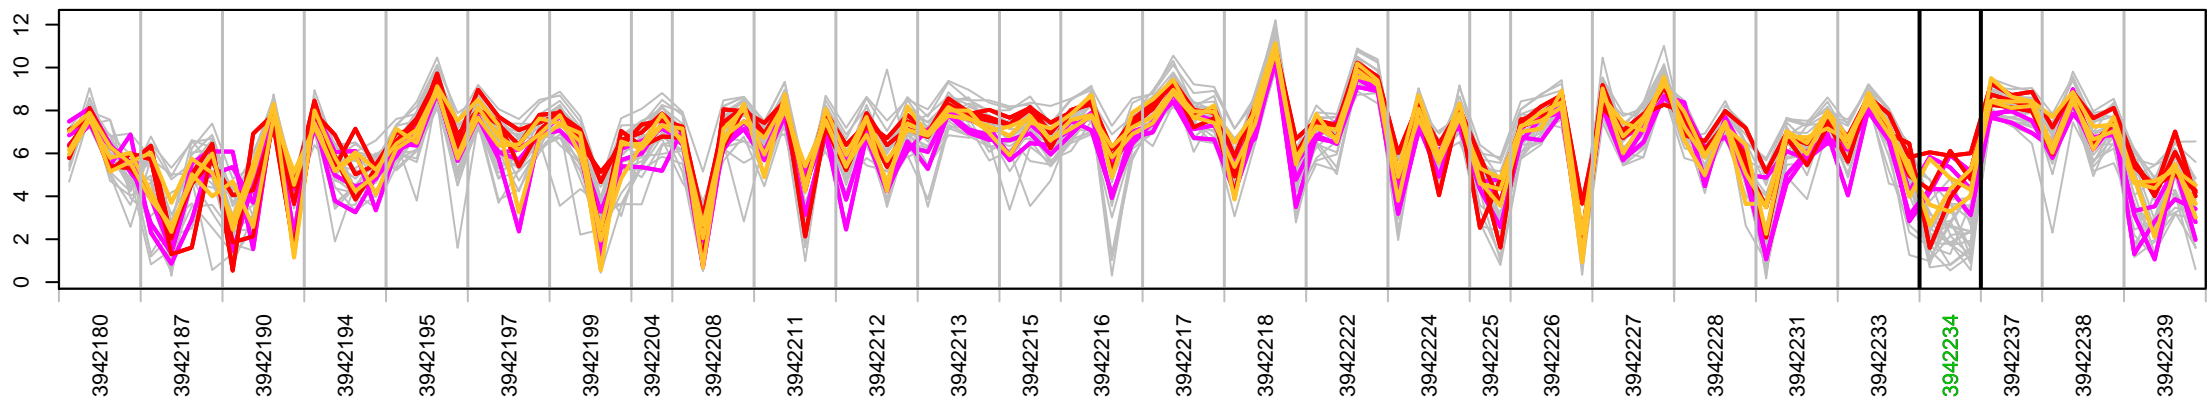



# FIRMA Scores of ENSG00000197321 – SVIL

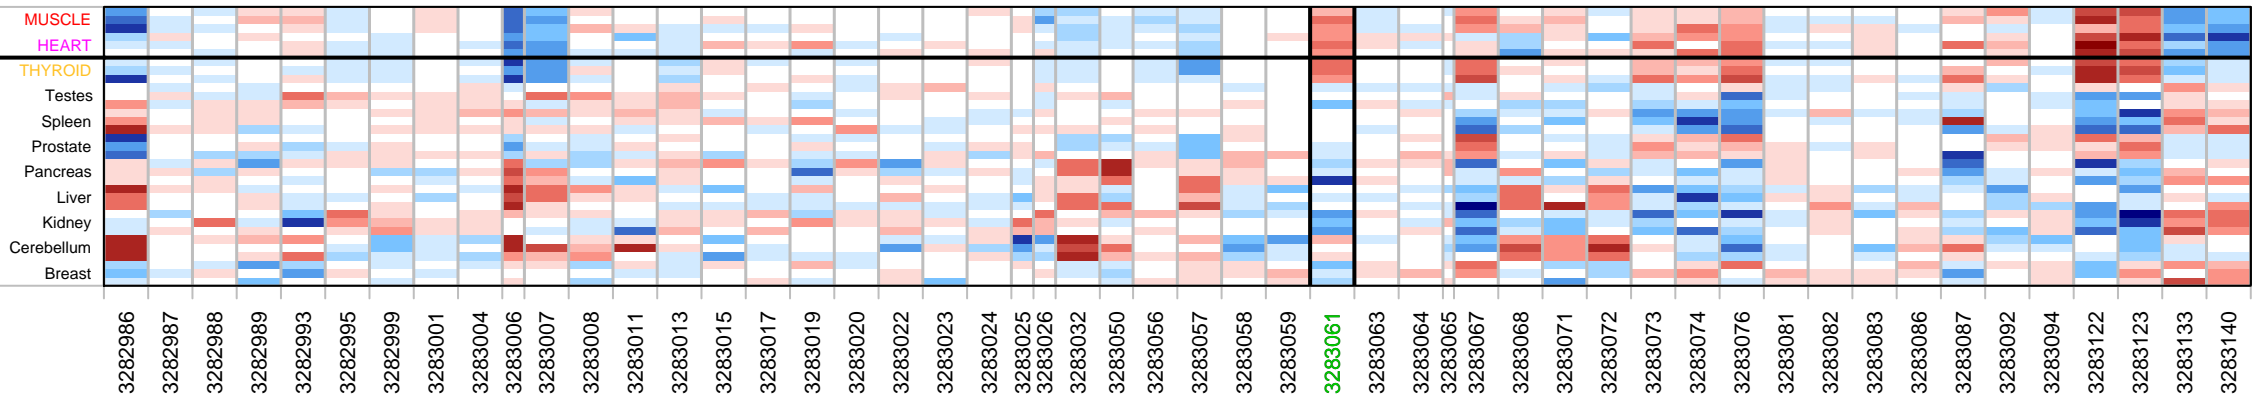

## Residuals

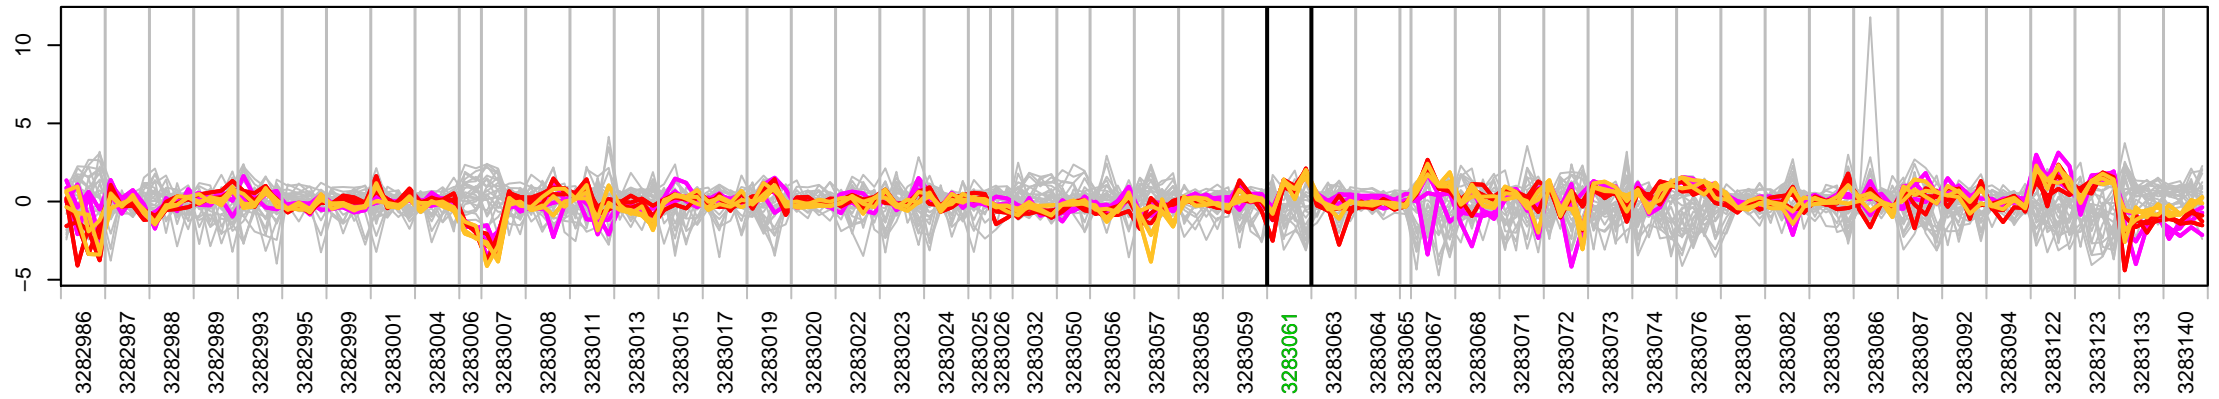

## Normalized Log Intensities

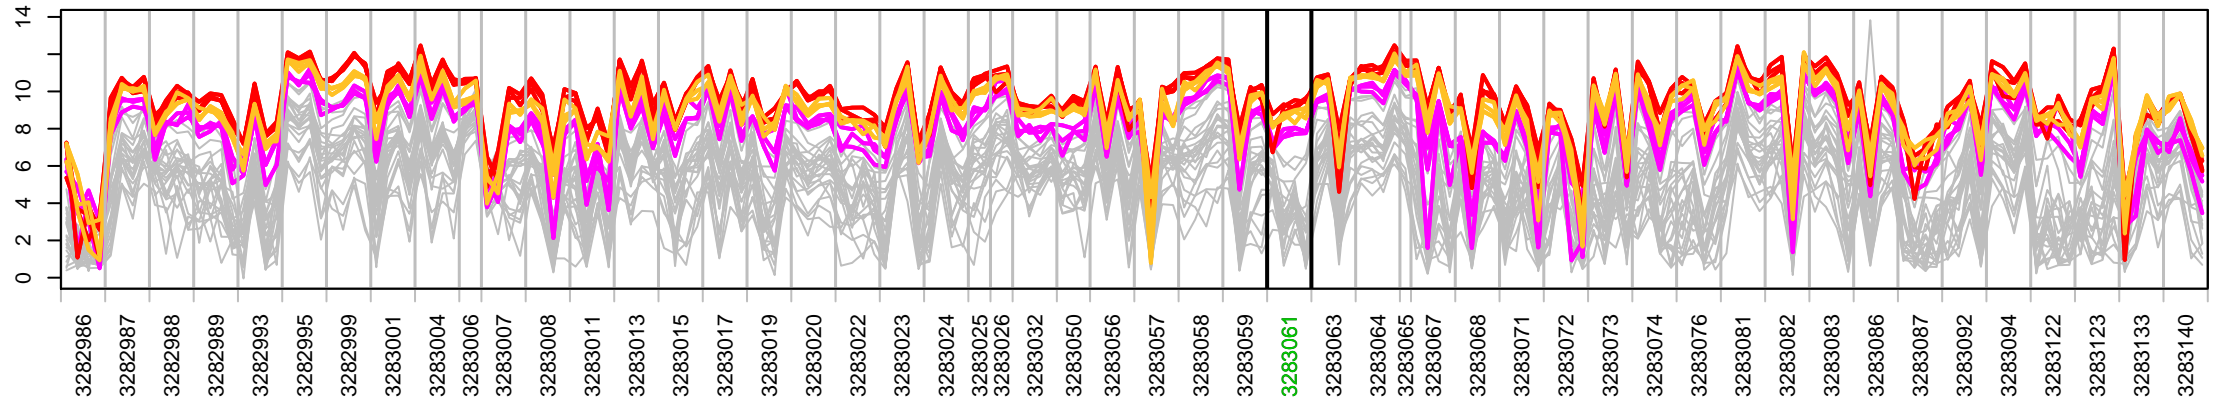

# FIRMA Scores of ENSG00000171714 - TMEM16E

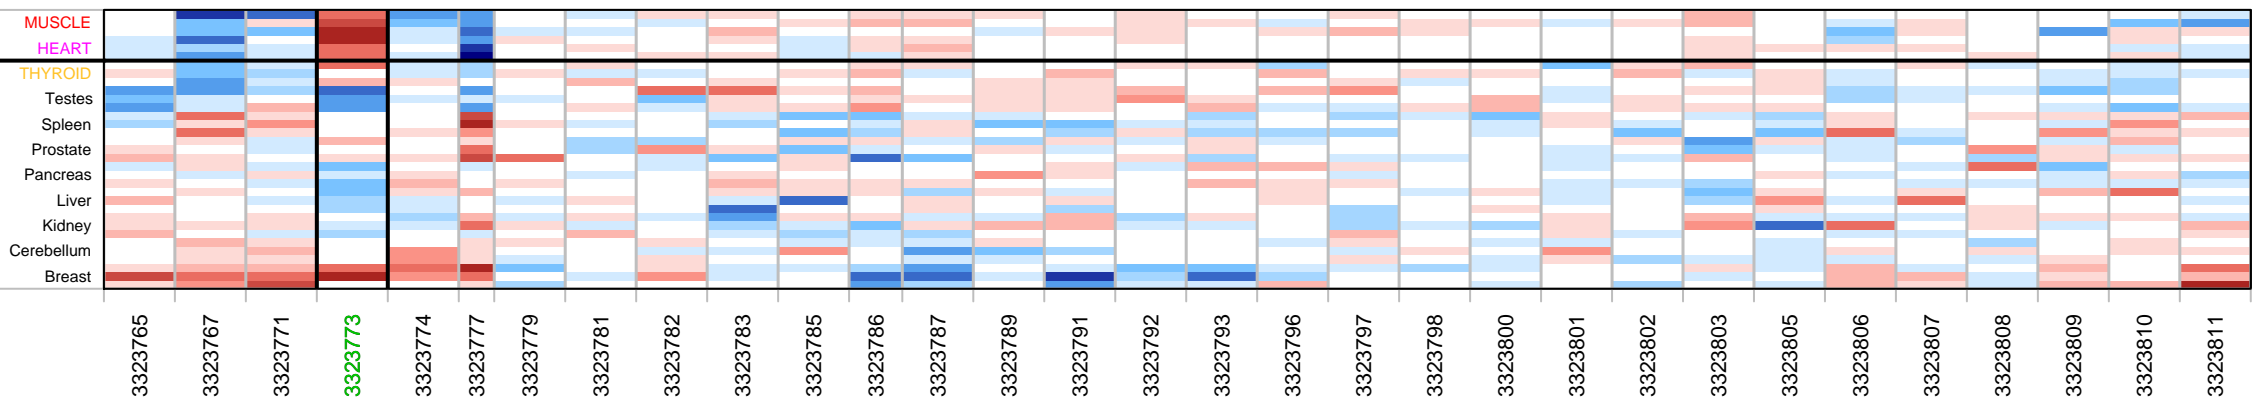

## Residuals

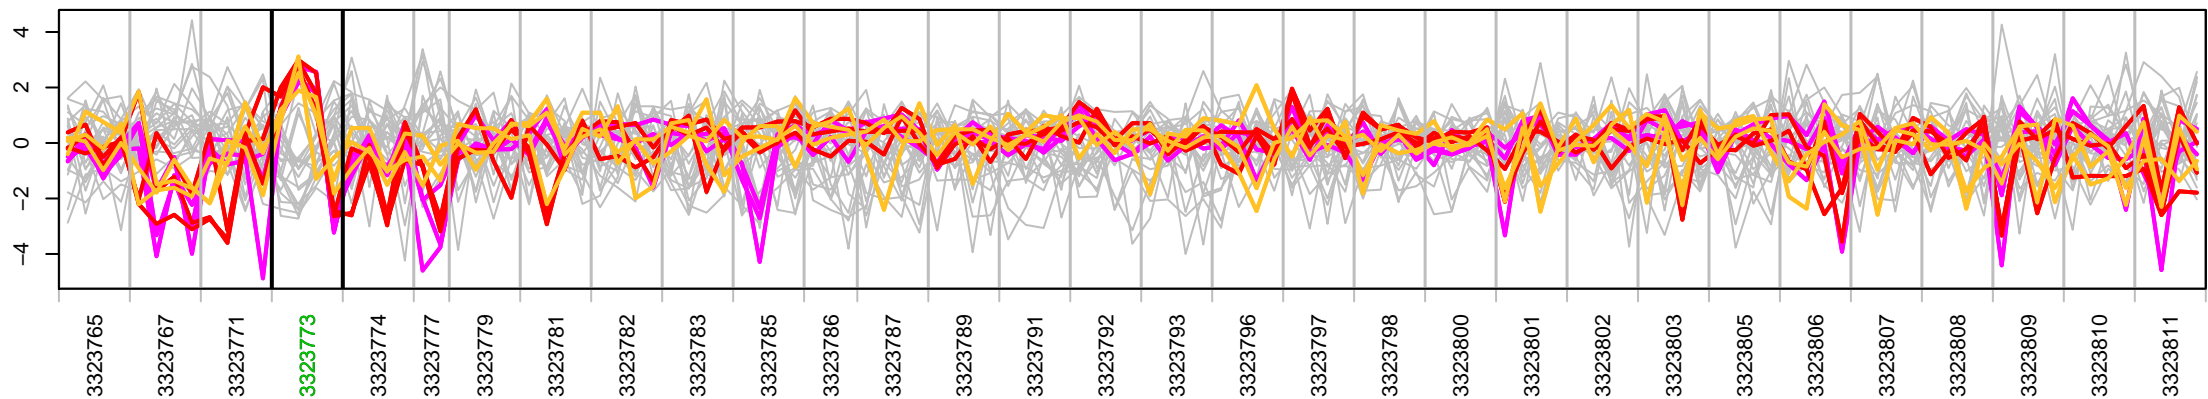

## Normalized Log Intensities

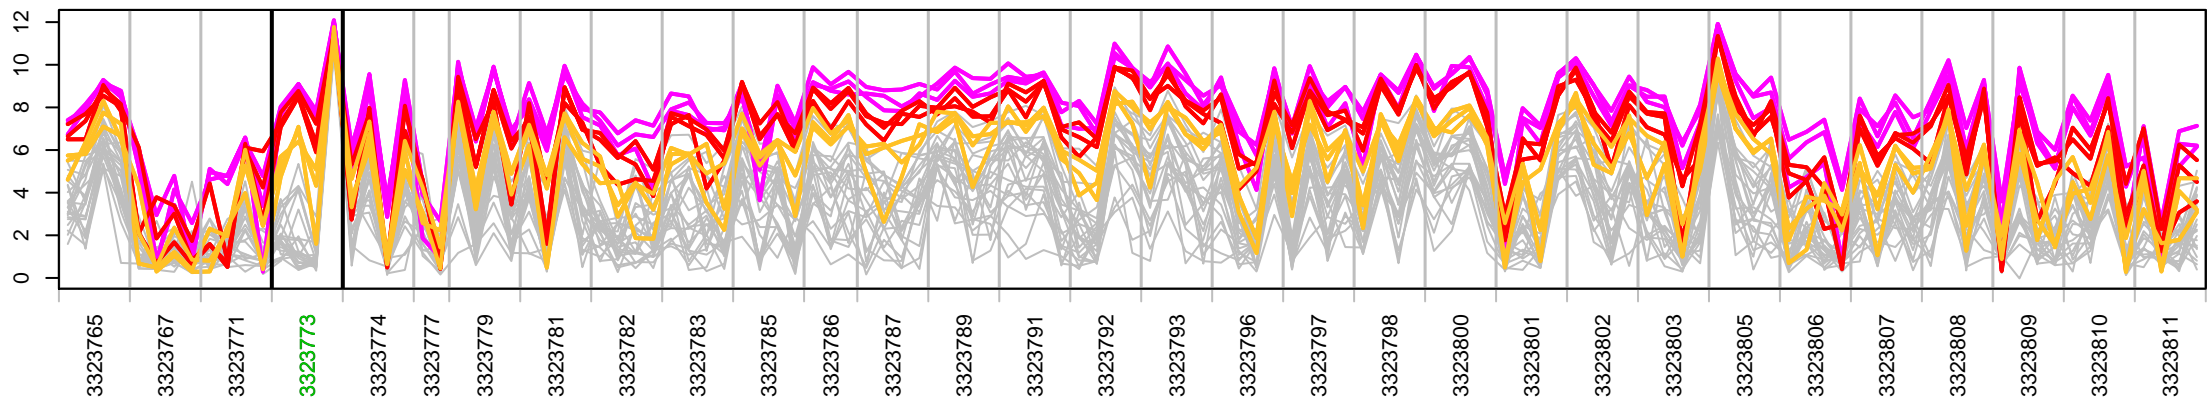

# FIRMA Scores of ENSG0000009307 – UNR

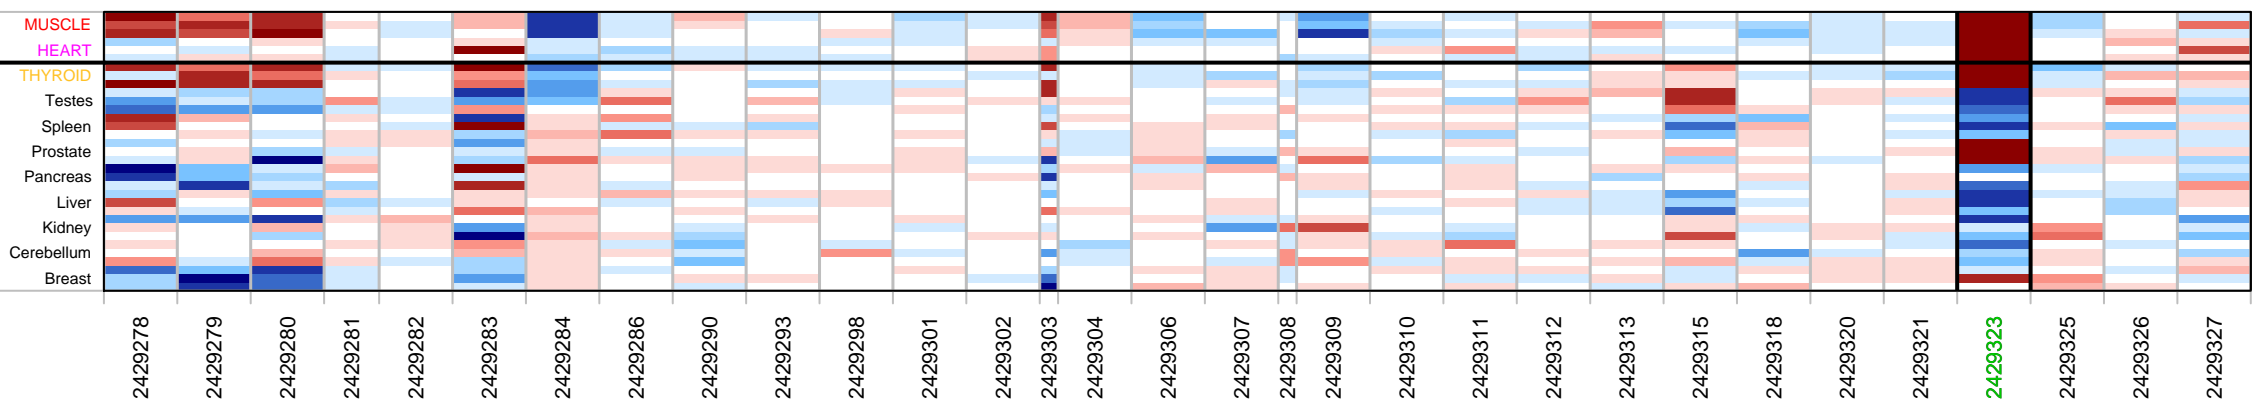

## Residuals

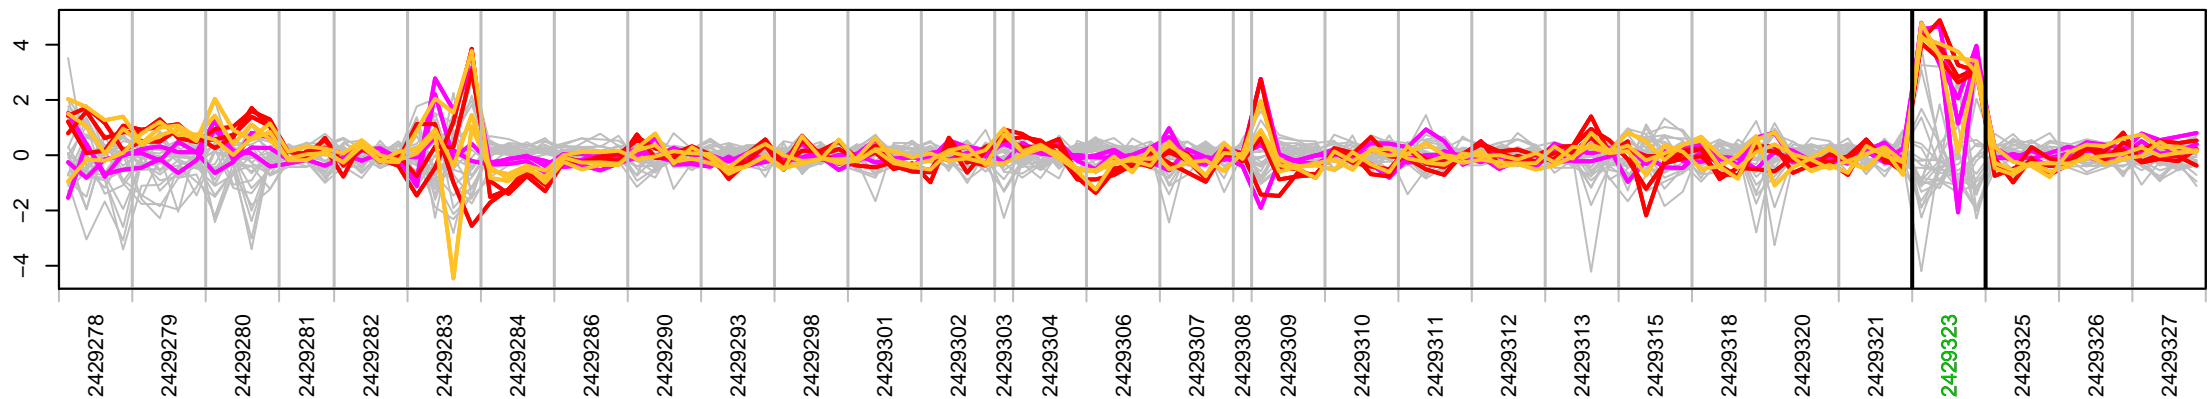

## Normalized Log Intensities

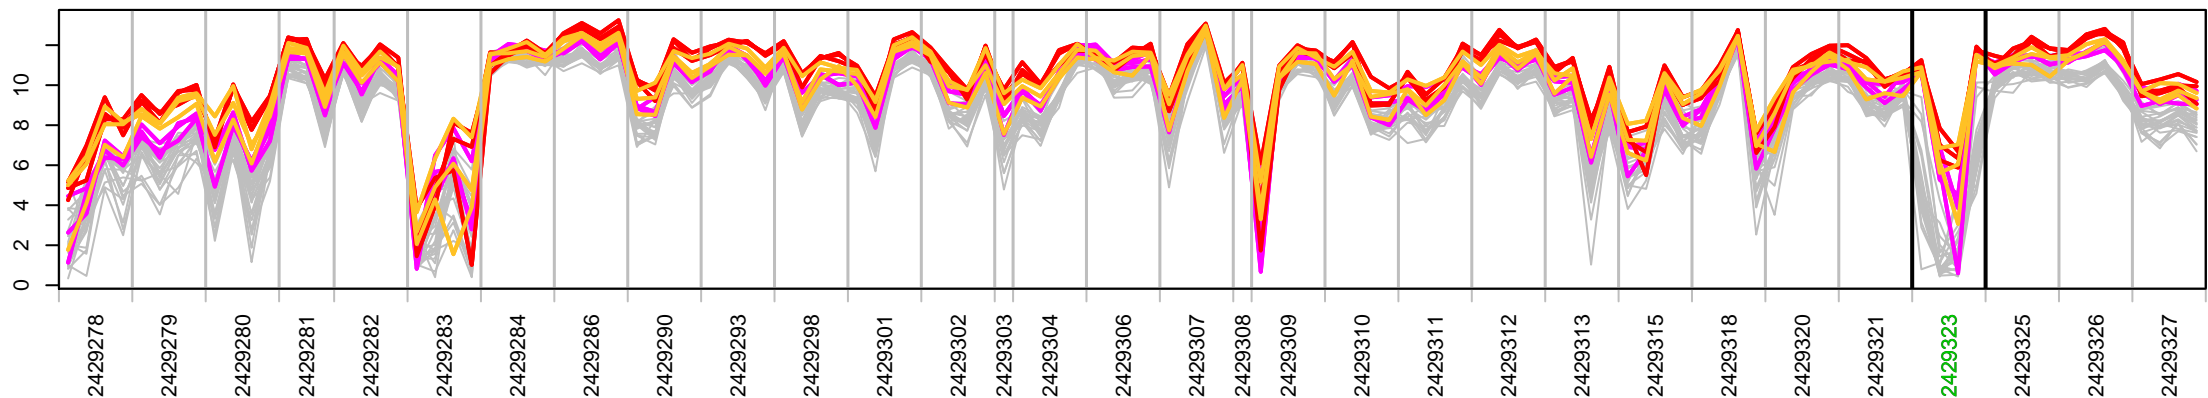

Supplement: btn284_3.pdf [file btn284_3.pdf]
